# Supplementary material for: Standardization of in situ coral bleaching measurements highlights the variability in responses across genera, morphologies, and regions
Source: PeerJ. 2023 Oct 2;11:e16100. doi: 10.7717/peerj.16100 (PMC10552771; doi:10.7717/peerj.16100)
Supplement: Supplemental Information 1 — Compiled coral bleaching observations by taxon and standardized bleaching severity scores. [file peerj-11-16100-s001.xlsx]

## Sheet: Metadata
Study location	Geographic region	Reef habitat / depth	Bleaching event(s) studied	Time of sampling with regard to bleaching event	Bleaching response metric	Method of determining bleaching	Citation	Article title
Gulf of California, Mexico	Pacific	1-12m depth	1997-08-03	After (1-4 months)	% of total colonies bleached (via point-transect)	in-situ surveys (i.e., by-eye)	Bonilla 2001	"Effects of the 1997–1998 El Niño–Southern Oscillation on coral communities of the Gulf of California, Mexico"
Palau, Western Pacific	Pacific	multiple reefs at shallower (3-5m depth) and deeper (10-12m depth) sites	1998	After (3-6 months)	either qualitative or (for limited # of taxa) % of colonies totally bleached	in-situ surveys	Bruno et al. 2001	"El Niño related coral bleaching in Palau, western Caroline Islands"
Farallon de Medinilla, Western Pacific	Pacific	<10m or 10-20m depth	2017	During	% of total colonies affected by bleaching	image analysis of quadrats	Carilli et al. 2017	"Coral bleaching variability during the 2017 global bleaching event on a remote, uninhabited island in the western Pacific: Farallon de Medinilla, Commonwealth of the Northern Mariana Islands"
Moorea, French Polynesia	Pacific	lagoon (0-2 or 2-4m) and outer reef slope (6-8 or 12-14m)	2002 & 2003	After (2 months later in both cases)	% of total colonies bleached	video surveys	Carroll et al. 2017	"Susceptibility of coral assemblages to successive bleaching events at Moorea, French Polynesia"
Singapore	Pacific	fringing reefs (2-7m depth)	2013	During	bleaching susceptibility, defined as the % of colonies that bleached relative to the total number of colonies of a particular genus	image analysis of quadrats	Chou et al. 2016	"Differential Response of Coral Assemblages to Thermal Stress Underscores the Complexity in Predicting Bleaching Susceptibility"
St. Croix, U.S. Virgin Islands	Atlantic	linear reefs, patch reefs, bedrock, pavement, and scattered coral/rock habitats (3-30m depth)	2005	During and after (within 1 year)	proportion of coral cover that was bleached	in-situ surveys	Clark et al. 2009	"Spatial and Temporal Patterns of Coral Bleaching Around Buck Island Reef National Monument, St. Croix, U.S. Virgin Islands"
Northwestern Hawaiian Islands	Pacific	fore reef (0-6m, 6-18m, or 18-30m) and back reef (0-6m or 6-18m)	2014	During / shortly after	% of total colonies bleached	in-situ surveys	Couch et al. 2017	"Mass coral bleaching due to unprecedented marine heatwave in Papahānaumokuākea Marine National Monument (Northwestern Hawaiian Islands)"
Lord Howe Island, Australia	Pacific	shallow lagoon sites to deeper reef slope sites	2010 & 2011	During and after	bleaching susceptibility index	in-situ surveys	Dalton et al. 2020	"Successive marine heatwaves cause disproportionate coral bleaching during a fast phase transition from El Niño to La Niña"
Kenya, Eastern Africa	Indian	multiple sites with varying depths	1998	Before, during, and after (time series)	bleaching sensitivity (based on frequency and severity)	in-situ surveys	Darling et al. 2013	"Life histories predict coral community disassembly under multiple stressors"
Papua New Guinea	Indian	reef flat and reef slopes (7-12m depth)	1996	After (~4 months later)	% of colonies along a transect totally or partially bleached	in-situ surveys	Davies et al. 1997	"Coral bleaching and elevated sea-water temperature in Milne Bay Province, Papua New Guinea, 1996"
Mayotte Island (Indian Ocean)	Indian	fringing and barrier reefs (1-15m depth)	2010	After (2 months later)	qualitative: estimated susceptibility to bleaching based on ﬁeld observations	"manta tows" / in-situ surveys	Eriksson et al. 2012	"Coral Bleaching and Associated Mortality at Mayotte, Western Indian Ocean"
Sodwana Bay, South Africa	Indian	reef complex (8-18m depth)	2000	During and after (1 year)	% of total colonies slightly, moderately, or severely bleached	in-situ surveys	Floros et al. 2004	"Taxonomic patterns of bleaching within a South African coral assemblage"
Great Barrier Reef, Australia	Pacific	shallow or mesophotic reefs (5 and 10m, 25m, or 40m depth)	2015-16	During	bleaching impact (proportion of colonies found to be bleached)	video transects	Frade et al. 2018	"Deep reefs of the Great Barrier Reef offer limited thermal refuge during mass coral bleaching"
Florida Keys	Atlantic	shallow inshore patch reef (2-6m depth)	2014 & 2015	During and after (6 months or 1 year later)	% of total colonies bleached, partially bleached, or pale	image analysis of mosaics	Gintert et al. 2018	"Marked annual coral bleaching resilience of an inshore patch reef in the Florida Keys: A nugget of hope, aberrance, or last man standing?"
Moorea, French Polynesia	Pacific	backreef (1-2m depth) and fore reef (10m depth)	1991	Shortly after (within 1 month)	bleaching scores (1-5) from none to paling, partial bleaching, or complete bleaching for % of colonies affected	in-situ surveys	Gleason 1993	"Effects of disturbance on coral communities: bleaching in Moorea, French Polynesia"
Panama, mainland Ecuador, and the Galápagos Islands	Pacific	shallow (1-10m) or deeper (12-18m) habitats; several sites per location	1997-08-03	During	condition assessments (% pale, bleached, or dead) for areas within single colonies	in-situ surveys	Glynn et al. 2001	"Coral bleaching and mortality in Panama and Ecuador during the 1997-1998 El Niño-Southern Oscillation event: Spatial/temporal patterns and comparisons with the 1982-1983 event"
3 locations in South East Asia: Indonesia, Singapore, and Malaysia	Pacific	1-6m depth	2010	After (5-6 months)	bleaching mortality index (BMI)	in-situ surveys	Guest et al. 2012	"Contrasting Patterns of Coral Bleaching Susceptibility in 2010 Suggest an Adaptive Response to Thermal Stress"
Singapore	Pacific	between ~2 and 5m along the reef flat and upper reef slope	2010	During and shortly after (within a month)	% of total colonies moderately or severely bleached; bleaching index (BI)	in-situ surveys	Guest et al. 2016	"Coral community response to bleaching on a highly disturbed reef"
Rodrigues, Western Indian	Indian	shallow reef flats (0.5-2m), reef slopes (5-6m depth), and patch reefs within a lagoon	2005	During and after (1 year)	% of total colonies bleached	in-situ surveys	Hardman et al. 2007	"The impacts of coral bleaching in Rodrigues, Western Indian Ocean"
Moorea, French Polynesia	Pacific	fore reefs (12m depth)	2016	During	bleaching severity categories	in-situ surveys & video transects	Hédouin et al. 2020	"Contrasting patterns of mortality in Polynesian coral reefs following the third global coral bleaching event in 2016"
Moorea, French Polynesia	Pacific	along the reef slope at 5-15m depth	1994	During	% of total colonies completely or partly bleached	in-situ surveys & image analysis	Hoegh-Guldberg & Salvat 1995	"Periodic mass-bleaching and elevated sea temperatures: bleaching of outer reef slope communities in Moorea, French Polynesia"
Grande Island, eastern Arabian Sea	Indian	patch reefs (2-4 or 4-8m depth)	2015	During / shortly after	bleaching severity categories	in-situ surveys	Hussain & Ingole 2020	"Massive coral bleaching in the patchy reef of Grande Island, along the eastern Arabian Sea during the 2015/16 global bleaching event"
Maldives	Indian	fore reef, reef flat, and reef slope (<7m or >7-13m depth)	2016	During	bleaching index (BI)	in-situ surveys	Ibrahim et al. 2017	"Status of Coral Bleaching in the Maldives in 2016"
Costa Rica, Eastern Pacific	Pacific	sites from 4-12m, 4-8m, or 3-6m depth	1997-08-01	Before, During, and After (time series)	% of total colonies affected by bleaching	in-situ surveys	Jiménez et al. 2001	"Coral bleaching and mortality associated with the 1997-98 El Niño in an upwelling environment in the eastern Pacific (Gulf of Papagayo, Costa Rica)"
Flower Garden Banks National Marine Sanctuary, Gulf of Mexico	Atlantic	18-24 or 24-40m	2016	During / shortly after (within 1 month)	% of total colonies bleached	image analysis of photostations	Johnston et al. 2019	"Coral bleaching and recovery from 2016 to 2017 at East and West Flower Garden Banks, Gulf of Mexico"
Kaneohe Bay, Oahu	Pacific	reef slopes (~1m depth)	1996 / 2002	During	qualitative: estimated sensitivity to bleaching based on ﬁeld observations	in-situ surveys	Jokiel & Brown 2004	"Global warming, regional trends and inshore environmental conditions inﬂuence coral bleaching in Hawaii"
Great Barrier Reef, Australia	Pacific	fringing reefs at 4-6m depth	2002	During / shortly after (within 1-2 weeks)	% of total colonies bleached	image analysis (small-scale)	Jones 2008	"Coral bleaching, bleaching-induced mortality, and the adaptive significance of the bleaching response"
Persian Gulf	Indian	nearshore (2-6m depth)	2012	During	% of total colonies affected by bleaching	in-situ surveys	Kavousi et al. 2014	"Mass coral bleaching in the northern Persian Gulf, 2012"
Ryukyu Islands, Japan	Pacific	across the reef flat	1998	Before, during, and after (2-year time series)	% of total colonies completely or partly bleached	in-situ surveys	Kayanne et al. 2002	"Recovery of coral populations after the 1998 bleaching on Shiraho Reef, in the southern Ryukyus, NW Pacific"
Keppel Islands, Southern Great Barrier Reef, Australia	Pacific	shallow fringing reef flats (2-5m) and reef slopes (6-9m)	2016	Shortly after (1 month later)	% of total colonies bleached	image analysis of quadrats	Kennedy et al. 2017	"Coral bleaching in the southern inshore Great Barrier Reef: a case study from the Keppel Islands"
Northwestern Hawaiian Islands	Pacific	shallow backreef and lagoon (1-10m depth)	2004	During	% of total colonies bleached	in-situ surveys	Kenyon & Brainard 2006	"Second recorded episode of mass coral bleaching in the Northwestern Hawaiian Islands"
Eastern Australia	Pacific	multiple sites from 3-13m depth	2016	During	bleaching index (BI)	in-situ surveys	Kim et al. 2019	"Refugia under threat: Mass bleaching of coral assemblages in high‐latitude eastern Australia"
Turks and Caicos Islands	Atlantic	fringing reefs >10m depth	2014-17	Before, during, and after (7-year time series)	Cross-correlation coefficients (between discrete average Coral Watch health scores and SST anomaly) computed for each species	in-situ surveys	Knipp et al. 2020	"Contrasting color loss and restoration in survivors of the 2014–2017 coral bleaching event in the Turks and Caicos Islands"
Bahamas, Florida, St. Croix, and Venezuela (Western Atlantic)	Atlantic	buttress or spur-and-groove fore reefs (3-13m depth)	1987	After (3-4 months)	relative % bleached via point-counts	in-situ surveys	Lang et al. 1992	"Spatial and Temporal Variability during Periods of 'Recovery' after Mass Bleaching on Western Atlantic Coral Reefs"
Moorea, French Polynesia	Pacific	lagoon (2-4m depth) on the seafloor, short, or tall bommies	2003	During (within a week)	% of total colonies bleached	in-situ surveys	Lenihan et al. 2008	"Reef structure regulates small-scale spatial variation in coral bleaching"
Sanya Bay, China	Pacific	fringing reef (1.5-4.5m depth)	2010	Shortly after (within 1 month)	% of total colonies bleached	in-situ surveys	Li et al. 2012	"Coral bleaching caused by an abnormal water temperature rise at Luhuitou fringing reef, Sanya Bay, China"
Sesoko Island, Japan	Pacific	reef flat at 2m depth	1998	Before and after	qualitative: estimated susceptibility to bleaching based on ﬁeld observations	in-situ surveys	Loya et al. 2001	"Coral bleaching: the winners and the losers"
Great Barrier Reef, Australia	Pacific	inshore fringing reefs at 2-4m and 5-8m depth	1998	Shortly after (6 weeks later)	% of colonies severely bleached, affected by bleaching, or dead	in-situ surveys	Marshall & Baird 2000	"Bleaching of corals on the Great Barrier Reef: differential susceptibilities among taxa"
Kaneohe Bay, Oahu	Pacific	inner and outer lagoon patch reefs (1-3m depth)	2015	During and up to 1.5 years after	bleaching prevalence (proportion of live coral affected by severe to moderate bleaching)	image analysis of quadrats	Matsuda et al. 2020	"Coral Bleaching Susceptibility Is Predictive of Subsequent Mortality Within but Not Between Coral Species"
Kenya, Eastern Africa	Indian	fringing back-reef lagoon (1-6m depth)	1998	Before (4 months prior) and during	bleaching index (BI) calculated as (0c1 + 1c2 + 2c3 + 3c4 + 4c5 + 5c6)/5 where c1 through c6 are categories of bleaching by colony	in-situ surveys	McClanahan 2004	"The relationship between bleaching and mortality of common corals"
Mauritius (Indian Ocean)	Indian	fringing reef at 2m depth	2004	Shortly after (within 1 month)	bleaching index (BI)	in-situ surveys	McClanahan et al. 2005	"Effects of geography, taxa, water flow, and temperature variation on coral bleaching intensity in Mauritius"
Kenya, Tanzania, Mozambique, South Africa, Madagascar, Réunion [France], the Seychelles, and the Maldives (Western Indian Ocean)	Indian	mostly shallow lagoon or reef edge sites (<3m depth) and some reef slopes (10m depth)	2005	During	bleaching response (BR) calculated as (0c1 + 1c2 + 2c3 + 3c4 + 4c5 + 5c6 + 6c7)/6 where c1 through c7 are categories of bleaching intensity by colony	in-situ surveys	McClanahan et al. 2007	"Western Indian Ocean coral communities: bleaching responses and susceptibility to extinction"
Belize (Caribbean)	Atlantic	back reef (<1.5m depth), fore reef (6-15m depth), and patch reef (1-3m depth)	1995	During and after (within a few months to 1 year)	% of total colonies affected by bleaching	in-situ surveys	McField 1999	"Coral response during and after mass bleaching in Belize"
Navassa Island (Caribbean)	Atlantic	deeper sites (18-37m) and shallow sites (<10m)	2005	After (1 year later)	% of total colonies bleached	in-situ surveys	Miller et al. 2011	"Coral mass bleaching and reef temperatures at Navassa Island, 2006"
Saudi Arabia, Red Sea	Indian	offshore, inshore, and midshelf reefs (5, 10, and 15m depth)	2015-16	During / shortly after (within a month)	% bleaching for a given taxon within a transect	in-situ surveys	Monroe et al. 2018	"In situ observations of coral bleaching in the central Saudi Arabian Red Sea during the 2015/2016 global coral bleaching event"
Kenya	Indian	lagoon patches (1-6m depth)	2007	Before, during, and after (1-year time series)	frequency of bleaching across colonies	in-situ surveys	Montano et al. 2010	"Assessing coral bleaching and recovery with a colour reference card in Watamu Marine Park, Kenya"
Great Barrier Reef, Australia	Pacific	nearshore turbid-zone reefs ~2m depth	2015-16	Before and shortly after	% of total colonies bleached and bleaching index (BI)	video surveys / image analysis	Morgan et al. 2017	"Nearshore Turbid-Zone Corals Exhibit High Bleaching Tolerance on the Great Barrier Reef Following the 2016 Ocean Warming Event"
Alacranes Reef, Southern Gulf of Mexico	Atlantic	platform reefs inside the lagoon (1-21.6m depth)	2015	During	bleaching index (BI)	in-situ surveys	Muñiz-Castillo & Arias-González 2021	"Drivers of coral bleaching in a Marine Protected Area of the Southern Gulf of Mexico during the 2015 event"
Singapore	Pacific	reef crest (~3m depth)	2016	3 months before, during, and 4 months after	bleaching index (BI), susceptibility, and resilience	image analysis of quadrats	Ng et al. 2020	"Responses of urban reef corals during the 2016 mass bleaching event"
Southern Great Barrier Reef, Australia	Pacific	lagoon / reef flat (unknown depth)	2020	During	% of total colonies bleached	video transects	Nolan et al. 2021	"Widespread bleaching in the One Tree Island lagoon (Southern Great Barrier Reef) during record‑breaking temperatures in 2020"
Kenya, Tanzania, Mozambique, and Madagascar (East Africa)	Indian	multiple sites from shallow subtidal to 20m depth	1997-08-02	During or shortly after (0-2 months)	% of total colonies completely bleached	in-situ surveys	Obura 2001	"Can differential bleaching and mortality among coral species offer useful indicators for assessment and management of reefs under stress?"
Mayotte Island (Indian Ocean)	Indian	inner or outer barrier; fringing; or bank reefs, mostly 8-12m depth; some at 4-7m or 16-20m	2010	After (2 months later)	% of total colonies bleached or pale	in-situ surveys	Obura et al. 2018	"Coral responses to a repeat bleaching event in Mayotte in 2010"
Barbados, Southeastern Caribbean	Atlantic	nearshore (<10 m depth) fringing and patch reefs; offshore (>15m) bank reefs	2005	Shortly after (within 1 month)	% of total colonies bleached	in-situ surveys	Oxenford et al. 2008	"Quantitative observations of a major coral bleaching event in Barbados, Southeastern Caribbean"
Majuro Atoll and Guam (Micronesia)	Pacific	fore reef, fringing, lagoonal, or patch reefs	1992 & 1994	During	qualitative estimates of % colonies affected based on ﬁeld surveys	in-situ surveys	Paulay & Benayahu 1999	"Patterns and consequences of coral bleaching in Micronesia (Majuro and Guam) in 1992-1994"
Gulf of Thailand	Pacific	1-6m depth	2010 & 2011	During / shortly after	bleaching index (BI)	in-situ surveys	Pengsakun et al. 2019	"Monitoring of coral communities in the inner Gulf of Thailand influenced by the elevated seawater temperature and flooding"
Maputaland, South Africa	Indian	6-19m depth	2016	5 months before, during, and 4 months after	bleaching index (BI)	in-situ surveys & video transects	Porter et al. 2021	"The Third Global Coral Bleaching Event on the Marginal Coral Reefs of the Southwestern Indian Ocean and Factors That Contribute to Their Resistance and Resilience"
Bolinao-Anda Reef Complex, northwestern Philippines	Pacific	3-5m depth	2016	During	bleaching prevalence (# of individual colonies bleached divided by total # of colonies)	in-situ surveys	Quimpo et al. 2020	"Low coral bleaching prevalence at the Bolinao-Anda Reef Complex, northwestern Philippines during the 2016 thermal stress event"
Guam, Micronesia	Pacific	shallow seaward slope (5m depth) and deeper reef flat sites (12m)	2017	After (3-4 months)	% of total observed colonies recorded as pale or bleached	image analysis of photo-transects	Raymundo et al. 2019	"Successive bleaching events cause mass coral mortality in Guam, Micronesia"
Southeastern Gulf (UAE and Qatar)	Indian	3.5-8.5m depth	2010	During / shortly after	% of total colonies bleached	image analysis of photo-transects	Riegl et al. 2012	"Coral Bleaching and Mortality Thresholds in the SE Gulf: Highest in the World"
Kaneohe Bay, Oahu	Pacific	patch reefs (0.5 and 2m depth)	2014 & 2015	Shortly after (1 month later)	proportion bleached (# of individual colonies bleached divided by total # of colonies counted for each site)	video transects	Ritson-Williams & Gates 2020	"Coral community resilience to successive years of bleaching in Kāneʻohe Bay, Hawai‘i"
Hanauma Bay Nature Preserve, Oahu	Pacific	inshore reefs (1m depth)	2015	During / shortly after	bleaching prevalence	in-situ surveys	Rodgers et al. 2017	"Patterns of bleaching and mortality following widespread warming events in 2014 and 2015 at the Hanauma Bay Nature Preserve, Hawai‘i"
Sesoko Island, Japan	Pacific	shallow reef flat (2m depth)	2016	After (2 months later)	% of total colonies bleached (within fixed plots)	in-situ surveys	Sakai et al. 2019	"Bleaching and post-bleaching mortality of Acropora corals on a heat-susceptible reef in 2016"
Southern Mozambique and South Africa	Indian	shallow (4-8m) and deeper (11-18m) sites	2005	During / shortly after (within a month)	bleaching response (BR)	in-situ surveys	Sebastián et al. 2009	"Bleaching response of corals and their Symbiodinium communities in southern Africa"
Arabian/Persian Gulf	Indian	5-8.5m depth	2012	During	% of total colonies bleached	in-situ surveys	Shuail et al. 2016	"Local bleaching thresholds established by remote sensing techniques vary among reefs with deviating bleaching patterns during the 2012 event in the Arabian/Persian Gulf"
Southern Seychelles and Aldabra Atoll (Western Indian Ocean)	Indian	fringing reefs, platform reefs, or atolls (5-20m depth)	1997-08-03	During / shortly after	qualitative: estimated colony bleaching based on ﬁeld observations	in-situ surveys & video transects	Spencer et al. 2000	"Coral Bleaching in the Southern Seychelles During the 1997–1998 Indian Ocean Warm Event"
Okinawa, Japan	Pacific	shallow reef flats ~2m depth	1997-08-03	After (5-10 months)	qualitative: estimated susceptibility to bleaching based on ﬁeld observations	in-situ surveys	Stimson et al. 2002	"Interspecific comparison of the symbiotic relationship in corals with high and low rates of bleaching-induced mortality"
Brazil	Atlantic	pinnacles: flat "tops" (1-10m) and steep "walls" (5-25m) as well as a deeper site (12-30m depth)	2016-17	During	% of total colonies heavily or partially bleached	image analysis of transects and quadrats	Teixeira et al. 2019	"Sustained mass coral bleaching (2016–2017) in Brazilian turbid-zone reefs: taxonomic, cross-shelf and habitat-related trends"
Palk Bay	Indian	nearshore fringing reef (~3m depth)	2016	2 months before, during, and 2 months after	bleaching prevalence	in-situ surveys	Thinesh et al. 2019	"Differential bleaching and recovery pattern of southeast Indian coral reef to 2016 global mass bleaching event: Occurrence of stress-tolerant symbiont Durusdinium (Clade D) in corals of Palk Bay"
Dongsha Atoll, South China Sea	Pacific	lagoon patch reefs; outer fore reefs at shallow (2-6m) and deeper (12-15m) zones	2015-16	During / shortly after	qualitative: 'thermally-susceptible' vs. 'thermally-resistant'	image analysis of transects and quadrats	Tkachenko & Soong 2017	"Dongsha Atoll: A potential thermal refuge for reef-building corals in the South China Sea"
Buluan Island, southern Philippines	Pacific	fringing reefs (8m depth)	2016	During	bleaching index (BI)	image analysis of quadrats	Valino et al. 2021	"Responses of Buluan Island turbid fringing reefs, southern Philippines to the 2016 thermal anomaly"
Palau, Western Pacific	Pacific	bay, patch, or outer reefs (2-5m depth)	2010	During	bleaching prevalence	image analysis of quadrats	Van Woesik et al. 2012	"Climate-change refugia in the sheltered bays of Palau: analogs of future reefs"
Phoenix Islands (Baker and Howland), Central Pacific	Pacific	10-15m depth	2010	During / shortly after	% of total colonies bleached	in-situ surveys (towed-diver)	Vargas-Ángel et al. 2011	"Severe, widespread El Niño–associated coral bleaching in the US Phoenix islands"
Con Dao Islands, Southern Vietnam (South China Sea)	Pacific	3-5m or 6-8m depth	2019	During	% of total colonies bleached	in-situ surveys	Vo et al. 2020	"Genus-specific bleaching at Con Dao Islands, Southern Vietnam, June 2019"
Palmyra Atoll, Central Pacific	Pacific	backreef, terrace (1.5-4m depth) and fore reef (9.5m depth)	2009	During	bleaching prevalence (% of individuals displaying signs of bleaching)	in-situ surveys	Williams et al. 2010	"Modeling patterns of coral bleaching at a remote Central Pacific atoll"

## Sheet: Bleaching dataset
Coral taxon (current)	Genus (current)	Species (current)	Coral taxon (as listed in study)	Genus (as listed in study)	Species (as listed in study)	Morphology	Geographic region	Bleaching susceptibility (by study)	Bleaching severity score (standardized)	Quantified response (by study)	Citation
Palauastrea ramosa	Palauastrea	ramosa	Palauastrea ramosa	Palauastrea	ramosa	branching	Pacific	Low	1	n/a (qualitative)	Bruno et al. 2001
Pocillopora damicornis	Pocillopora	damicornis	Pocillopora damicornis	Pocillopora	damicornis	branching	Pacific	Mixed	n/a	n/a (qualitative)	Bruno et al. 2001
Pocillopora grandis	Pocillopora	grandis	Pocillopora eydouxi	Pocillopora	eydouxi	branching	Pacific	High	3	n/a (qualitative)	Bruno et al. 2001
Pocillopora	Pocillopora	spp.	Pocillopora spp.	Pocillopora	spp.	branching	Pacific	High	3	n/a (qualitative)	Bruno et al. 2001
Seriatopora	Seriatopora	spp.	Seriatopora spp.	Seriatopora	spp.	branching	Pacific	High	3	n/a (qualitative)	Bruno et al. 2001
Stylophora	Stylophora	spp.	Stylophora spp.	Stylophora	spp.	branching	Pacific	High	3	n/a (qualitative)	Bruno et al. 2001
Acropora echinata	Acropora	echinata	Acropora echinata	Acropora	echinata	branching	Pacific	Severe	4	n/a (qualitative)	Bruno et al. 2001
Acropora muricata	Acropora	muricata	Acropora formosa	Acropora	formosa	branching	Pacific	High	3	n/a (qualitative)	Bruno et al. 2001
Acropora	Acropora	spp.	Acropora spp. (branching)	Acropora	spp.	branching	Pacific	Mixed	n/a	32% bleached	Bruno et al. 2001
Acropora hyacinthus	Acropora	hyacinthus	Acropora hyacinthus	Acropora	hyacinthus	table / branching	Pacific	Severe	4	n/a (qualitative)	Bruno et al. 2001
Acropora	Acropora	spp.	Acropora spp. (table)	Acropora	spp.	table / branching	Pacific	High	3	n/a (qualitative)	Bruno et al. 2001
Astreopora	Astreopora	spp.	Astreopora spp.	Astreopora	spp.	massive / encrusting	Pacific	Moderate	2	50% bleached	Bruno et al. 2001
Montipora	Montipora	spp.	Montipora spp.	Montipora	spp.	encrusting / plating	Pacific	Mixed	n/a	5% bleached	Bruno et al. 2001
Alveopora	Alveopora	spp.	Alveopora spp.	Alveopora	spp.	massive	Pacific	Low	1	n/a (qualitative)	Bruno et al. 2001
Goniopora stokesi	Goniopora	stokesi	Goniopora stokesi	Goniopora	stokesii	massive	Pacific	Mixed	n/a	n/a (qualitative)	Bruno et al. 2001
Goniopora	Goniopora	spp.	Goniopora spp.	Goniopora	spp.	massive	Pacific	Mixed	n/a	0% bleached	Bruno et al. 2001
Porites lobata / lutea	Porites	lobata / lutea	Porites lobata / lutea	Porites	lobata / lutea	massive	Pacific	Moderate	2	n/a (qualitative)	Bruno et al. 2001
Porites rus	Porites	rus	Porites rus	Porites	rus	branching / encrusting	Pacific	Moderate	2	n/a (qualitative)	Bruno et al. 2001
Porites cylindrica	Porites	cylindrica	Porites cylindrica	Porites	cylindrica	branching	Pacific	High	3	n/a (qualitative)	Bruno et al. 2001
Porites nigrescens	Porites	nigrescens	Porites nigrescens	Porites	nigrescens	branching	Pacific	Severe	4	n/a (qualitative)	Bruno et al. 2001
Psammocora contigua	Psammocora	contigua	Psammocora contigua	Psammocora	contigua	branching / plating	Pacific	Moderate	2	n/a (qualitative)	Bruno et al. 2001
Psammocora digitata	Psammocora	digitata	Psammocora digitata	Psammocora	digitata	columnar	Pacific	High	3	n/a (qualitative)	Bruno et al. 2001
Leptoseris gardineri	Leptoseris	gardineri	Leptoseris gardineri	Leptoseris	gardineri	branching / plating	Pacific	High	3	n/a (qualitative)	Bruno et al. 2001
Leptoseris papyracea	Leptoseris	papyracea	Leptoseris papyracea	Leptoseris	papyracea	branching / plating	Pacific	High	3	n/a (qualitative)	Bruno et al. 2001
Pachyseris rugosa	Pachyseris	rugosa	Pachyseris rugosa	Pachyseris	rugosa	encrusting / plating	Pacific	High	3	n/a (qualitative)	Bruno et al. 2001
Pachyseris speciosa	Pachyseris	speciosa	Pachyseris speciosa	Pachyseris	speciosa	plating	Pacific	High	3	58% bleached	Bruno et al. 2001
Pavona cactus	Pavona	cactus	Pavona cactus	Pavona	cactus	plating	Pacific	High	3	n/a (qualitative)	Bruno et al. 2001
Pavona clavus	Pavona	clavus	Pavona clavus	Pavona	clavus	branching	Pacific	High	3	n/a (qualitative)	Bruno et al. 2001
Pavona minuta	Pavona	minuta	Pavona minuta	Pavona	minuta	plating	Pacific	High	3	n/a (qualitative)	Bruno et al. 2001
Cycloseris	Cycloseris	spp.	Cycloseris spp.	Cycloseris	spp.	free-living	Pacific	None	0	n/a (qualitative)	Bruno et al. 2001
Cycloseris	Cycloseris	sp.	Diaseris spp.	Diaseris	spp.	free-living	Pacific	None	0	n/a (qualitative)	Bruno et al. 2001
Fungia	Fungia	spp.	Fungia spp.	Fungia	spp.	free-living	Pacific	Mixed	n/a	51% bleached	Bruno et al. 2001
Heliofungia actiniformis	Heliofungia	actiniformis	Heliofungia actiniformis	Heliofungia	actiniformis	free-living	Pacific	None	0	0% bleached	Bruno et al. 2001
Podabacia crustacea	Podabacia	crustacea	Podabacia crustacea	Podabacia	crustacea	encrusting	Pacific	Moderate	2	n/a (qualitative)	Bruno et al. 2001
Galaxea astreata	Galaxea	astreata	Galaxea astreata	Galaxea	astreata	massive	Pacific	High	3	20% bleached	Bruno et al. 2001
Mycedium elephantotus	Mycedium	elephantotus	Mycedium elephantotus	Mycedium	elephantotus	plating	Pacific	Moderate	2	n/a (qualitative)	Bruno et al. 2001
Pectinia lactuca	Pectinia	lactuca	Pectinia lactuca	Pectinia	lactuca	plating	Pacific	High	3	n/a (qualitative)	Bruno et al. 2001
Pectinia paeonia	Pectinia	paeonia	Pectinia paeonia	Pectinia	paeonia	plating	Pacific	High	3	53% bleached	Bruno et al. 2001
Cynarina lacrymalis	Cynarina	lacrymalis	Cynarina lacrymalis	Cynarina	lacrymalis	free-living	Pacific	High	3	n/a (qualitative)	Bruno et al. 2001
Lobophyllia corymbosa	Lobophyllia	corymbosa	Lobophyllia corymbosa	Lobophyllia	corymbosa	encrusting	Pacific	High	3	n/a (qualitative)	Bruno et al. 2001
Lobophyllia hataii	Lobophyllia	hataii	Lobophyllia hataii	Lobophyllia	hataii	encrusting	Pacific	High	3	n/a (qualitative)	Bruno et al. 2001
Lobophyllia hemprichii	Lobophyllia	hemprichii	Lobophyllia hemprichii	Lobophyllia	hemprichii	encrusting	Pacific	High	3	n/a (qualitative)	Bruno et al. 2001
Acanthastrea pachysepta	Acanthastrea	pachysepta	Lobophyllia pachysepta	Lobophyllia	pacysepta	encrusting	Pacific	High	3	n/a (qualitative)	Bruno et al. 2001
Lobophyllia	Lobophyllia	spp.	Symphyllia spp.	Symphyllia	spp.	encrusting	Pacific	High	3	n/a (qualitative)	Bruno et al. 2001
Hydnophora	Hydnophora	spp.	Hydnophora spp.	Hydnophora	spp.	massive	Pacific	Low	1	n/a (qualitative)	Bruno et al. 2001
Merulina	Merulina	spp.	Merulina spp.	Merulina	spp.	plating	Pacific	Moderate	2	n/a (qualitative)	Bruno et al. 2001
Dipsastraea amicorum	Dipsastraea	amicorum	Barabattoia amicorum	Barabattoia	amicorum	massive	Pacific	Low	1	n/a (qualitative)	Bruno et al. 2001
Caulastraea furcata	Caulastraea	furcata	Caulastrea furcata	Caulastrea	furcata	massive	Pacific	None	0	n/a (qualitative)	Bruno et al. 2001
Diploastrea heliopora	Diploastrea	heliopora	Diploastrea heliopora	Diploastrea	heliopora	massive	Pacific	Mixed	n/a	n/a (qualitative)	Bruno et al. 2001
Favia	Favia	spp.	Favia spp.	Favia	spp.	massive	Pacific	Mixed	n/a	71% bleached	Bruno et al. 2001
Favites	Favites	spp.	Favites spp.	Favites	spp.	massive	Pacific	Mixed	n/a	61% bleached	Bruno et al. 2001
Goniastrea	Goniastrea	spp.	Goniastrea	Goniastrea	spp.	massive	Pacific	Mixed	n/a	n/a (qualitative)	Bruno et al. 2001
Leptoria	Leptoria	spp.	Leptoria spp.	Leptoria	spp.	massive	Pacific	Mixed	n/a	n/a (qualitative)	Bruno et al. 2001
Oulophyllia	Oulophyllia	spp.	Oulophyllia spp.	Oulophyllia	spp.	massive	Pacific	High	3	n/a (qualitative)	Bruno et al. 2001
Platygyra	Platygyra	spp.	Platygyra spp.	Platygyra	spp.	massive	Pacific	High	3	55% bleached	Bruno et al. 2001
Turbinaria bifrons	Turbinaria	bifrons	Turbinaria bifrons	Turbinaria	bifrons	plating	Pacific	High	3	n/a (qualitative)	Bruno et al. 2001
Turbinaria peltata	Turbinaria	peltata	Turbinaria peltata	Turbinaria	peltata	plating	Pacific	High	3	n/a (qualitative)	Bruno et al. 2001
Porites	Porites	spp.	Porites	Porites	spp.	branching / massive	Pacific	None	0	0% bleached	Carroll et al. 2017
Porites	Porites	spp.	Porites	Porites	spp.	branching / massive	Pacific	None	0	0% bleached	Carroll et al. 2017
Pocillopora	Pocillopora	spp.	Pocillopora	Pocillopora	spp.	branching	Pacific	Low	1	0-10% bleached	Carroll et al. 2017
Pocillopora	Pocillopora	spp.	Pocillopora	Pocillopora	spp.	branching	Pacific	Low	1	0-20% bleached	Carroll et al. 2017
Acropora	Acropora	spp.	Acropora	Acropora	spp.	branching	Pacific	High	3	50-90% bleached	Carroll et al. 2017
Acropora	Acropora	spp.	Acropora	Acropora	spp.	branching	Pacific	Mixed	n/a	0-100% bleached	Carroll et al. 2017
Montipora	Montipora	spp.	Montipora	Montipora	spp.	encrusting / plating	Pacific	Moderate	2	20-50% bleached	Carroll et al. 2017
Montipora	Montipora	spp.	Montipora	Montipora	spp.	encrusting / plating	Pacific	Moderate	2	20-50% bleached	Carroll et al. 2017
Pachyseris	Pachyseris	sp.	Pachyseris	Pachyseris	sp.	plating	Pacific	High	3	31% bleaching susceptibility	Chou et al. 2016
Podabacia	Podabacia	sp.	Podabacia	Podabacia	sp.	encrusting / plating	Pacific	High	3	30.8% bleaching susceptibility	Chou et al. 2016
Lithophyllon	Lithophyllon	sp.	Lithophyllon	Lithophyllon	sp.	free-living	Pacific	Moderate	2	16.7% bleaching susceptibility	Chou et al. 2016
Goniastrea	Goniastrea	sp.	Goniastrea	Goniastrea	sp.	massive	Pacific	Moderate	2	14.3% bleaching susceptibility	Chou et al. 2016
Platygyra	Platygyra	sp.	Platygyra	Platygyra	sp.	massive	Pacific	Moderate	2	10.6% bleaching susceptibility	Chou et al. 2016
Porites	Porites	sp.	Porites	Porites	sp.	branching / massive	Pacific	Moderate	2	9.5% bleaching susceptibility	Chou et al. 2016
Diploastrea	Diploastrea	sp.	Diploastrea	Diploastrea	sp.	massive	Pacific	Low	1	8.3% bleaching susceptibility	Chou et al. 2016
Goniopora	Goniopora	sp.	Goniopora	Goniopora	sp.	massive	Pacific	Low	1	7.2% bleaching susceptibility	Chou et al. 2016
Pectinia	Pectinia	sp.	Pectinia	Pectinia	sp.	branching / plating	Pacific	Low	1	6.4% bleaching susceptibility	Chou et al. 2016
Coscinaraea	Coscinaraea	sp.	Coscinaraea	Coscinaraea	sp.	encrusting / plating	Pacific	Low	1	6.1% bleaching susceptibility	Chou et al. 2016
Lobophyllia	Lobophyllia	sp.	Lobophyllia	Lobophyllia	sp.	encrusting	Pacific	Low	1	5.3% bleaching susceptibility	Chou et al. 2016
Dipsastraea	Dipsastraea	sp.	Dipsastraea	Dipsastraea	sp.	massive	Pacific	Low	1	4.7% bleaching susceptibility	Chou et al. 2016
Pavona	Pavona	sp.	Pavona	Pavona	sp.	massive / encrusting	Pacific	Low	1	4.2% bleaching susceptibility	Chou et al. 2016
Lobophyllia	Lobophyllia	sp.	Symphyllia	Symphyllia	sp.	encrusting	Pacific	Low	1	4.2% bleaching susceptibility	Chou et al. 2016
Hydnophora	Hydnophora	sp.	Hydnophora	Hydnophora	sp.	massive	Pacific	Low	1	4.2% bleaching susceptibility	Chou et al. 2016
Turbinaria	Turbinaria	sp.	Turbinaria	Turbinaria	sp.	plating	Pacific	Low	1	2.9% bleaching susceptibility	Chou et al. 2016
Montipora	Montipora	sp.	Montipora	Montipora	sp.	encrusting / plating	Pacific	Low	1	2.6% bleaching susceptibility	Chou et al. 2016
Fungia	Fungia	sp.	Fungia	Fungia	sp.	free-living	Pacific	Low	1	2.2% bleaching susceptibility	Chou et al. 2016
Merulina	Merulina	sp.	Merulina	Merulina	sp.	plating	Pacific	Low	1	2.1% bleaching susceptibility	Chou et al. 2016
Astreopora	Astreopora	sp.	Astreopora	Astreopora	sp.	massive / encrusting	Pacific	Low	1	1.8% bleaching susceptibility	Chou et al. 2016
Echinopora	Echinopora	sp.	Echinopora	Echinopora	sp.	plating	Pacific	Low	1	1.6% bleaching susceptibility	Chou et al. 2016
Leptoria	Leptoria	sp.	Leptoria	Leptoria	sp.	massive	Pacific	Low	1	1.5% bleaching susceptibility	Chou et al. 2016
Favites	Favites	sp.	Favites	Favites	sp.	massive	Pacific	Low	1	1.2% bleaching susceptibility	Chou et al. 2016
Alveopora	Alveopora	sp.	Alveopora	Alveopora	sp.	massive	Pacific	None	0	0% bleaching susceptibility	Chou et al. 2016
Galaxea	Galaxea	sp.	Galaxea	Galaxea	sp.	massive	Pacific	None	0	0% bleaching susceptibility	Chou et al. 2016
Cyphastrea	Cyphastrea	sp.	Cyphastrea	Cyphastrea	sp.	massive	Pacific	None	0	0% bleaching susceptibility	Chou et al. 2016
Ctenactis	Ctenactis	sp.	Ctenactis	Ctenactis	sp.	free-living	Pacific	None	0	0% bleaching susceptibility	Chou et al. 2016
Oxypora	Oxypora	sp.	Oxypora	Oxypora	sp.	plating	Pacific	None	0	0% bleaching susceptibility	Chou et al. 2016
Mycedium	Mycedium	sp.	Mycedium	Mycedium	sp.	plating	Pacific	None	0	0% bleaching susceptibility	Chou et al. 2016
Acropora	Acropora	sp.	Acropora	Acropora	sp.	table / branching	Pacific	None	0	0% bleaching susceptibility	Chou et al. 2016
Oulastrea	Oulastrea	sp.	Oulastrea	Oulastrea	sp.	encrusting	Pacific	None	0	0% bleaching susceptibility	Chou et al. 2016
Pocillopora	Pocillopora	sp.	Pocillopora	Pocillopora	sp.	branching	Pacific	None	0	0% bleaching susceptibility	Chou et al. 2016
Herpolitha	Herpolitha	sp.	Herpolitha	Herpolitha	sp.	free-living	Pacific	None	0	0% bleaching susceptibility	Chou et al. 2016
Psammocora	Psammocora	sp.	Psammocora	Psammocora	sp.	encrusting	Pacific	None	0	0% bleaching susceptibility	Chou et al. 2016
Acropora cervicornis	Acropora	cervicornis	Acropora cervicornis	Acropora	cervicornis	branching	Atlantic	None	0	0% bleaching	Clark et al. 2009
Eusmilia fastigiata	Eusmilia	fastigiata	Eusmilia fastigiata	Eusmilia	fastigiata	massive	Atlantic	None	0	0% bleaching	Clark et al. 2009
Dendrogyra cylindrus	Dendrogyra	cylindrus	Dendrogyra cylindrus	Dendrogyra	cylindrus	columnar	Atlantic	None	0	0% bleaching	Clark et al. 2009
Madracis decactis	Madracis	decactis	Madracis decactis	Madracis	decactis	columnar	Atlantic	None	0	0% bleaching	Clark et al. 2009
Scolymia	Scolymia	spp.	Scolymia spp.	Scolymia	spp.	free-living	Atlantic	None	0	0% bleaching	Clark et al. 2009
Agaricia	Agaricia	spp.	Agaricia spp.	Agaricia	spp.	plating	Atlantic	Severe	4	96% bleaching	Clark et al. 2009
Siderastrea radians	Siderastrea	radians	Siderastrea radians	Siderastrea	radians	massive	Atlantic	Low	1	35% bleaching	Clark et al. 2009
Porites astreoides	Porites	astreoides	Porites astreoides	Porites	astreoides	massive	Atlantic	Moderate	2	42% bleaching	Clark et al. 2009
Diploria labyrinthiformis	Diploria	labyrinthiformis	Diploria labyrinthiformis	Diploria	labyrinthiformis	massive	Atlantic	High	3	>75% bleaching	Clark et al. 2009
Mycetophyllia ferox	Mycetophyllia	ferox	Mycetophyllia ferox	Mycetophyllia	ferox	plating	Atlantic	High	3	>75% bleaching	Clark et al. 2009
Isophyllia rigida	Isophyllia	rigida	Isophyllia rigida	Isophyllia	rigida	massive	Atlantic	High	3	>75% bleaching	Clark et al. 2009
Mycetophyllia	Mycetophyllia	spp.	Mycetophyllia spp.	Mycetophyllia	spp.	plating / massive	Atlantic	High	3	>75% bleaching	Clark et al. 2009
Orbicella annularis	Orbicella	annularis	Montastrea annularis	Montastrea	annularis	massive	Atlantic	High	3	>75% bleaching	Clark et al. 2009
Porites porites	Porites	porites	Porites porites	Porites	porites	branching	Atlantic	High	3	>75% bleaching	Clark et al. 2009
Isophyllia sinuosa	Isophyllia	sinuosa	Isophyllia sinuosa	Isophyllia	sinuosa	massive	Atlantic	High	3	>75% bleaching	Clark et al. 2009
Montipora patula	Montipora	patula	Montipora patula	Montipora	patula	encrusting	Pacific	Low	1	~15% bleaching	Couch et al. 2017
Montipora capitata	Montipora	capitata	Montipora capitata	Montipora	capitata	branching / encrusting	Pacific	Moderate	2	40% bleaching	Couch et al. 2017
Pocillopora damicornis	Pocillopora	damicornis	Pocillopora damicornis	Pocillopora	damicornis	branching	Pacific	Low	1	10% bleaching	Couch et al. 2017
Pocillopora meandrina	Pocillopora	meandrina	Pocillopora meandrina	Pocillopora	meandrina	branching	Pacific	Low	1	~5% bleaching	Couch et al. 2017
Pocillopora lingulata	Pocillopora	lingulata	Pocillopora lingulata	Pocillopora	lingulata	branching	Pacific	Low	1	10% bleaching	Couch et al. 2017
Porites lutea	Porites	lutea	Porites lutea	Porites	lutea	massive	Pacific	None	0	0% bleaching	Couch et al. 2017
Porites lobata / lichen	Porites	lobata / lichen	Porites lobata / lichen	Porites	lobata	massive	Pacific	None	0	0% bleaching	Couch et al. 2017
Porites compressa	Porites	compressa	Porites compressa	Porites	compressa	branching	Pacific	None	0	0% bleaching	Couch et al. 2017
Montipora dilatata	Montipora	dilatata	Montipora dilatata	Montipora	dilatata	encrusting	Pacific	Severe	4	90% bleaching	Couch et al. 2017
Montipora patula	Montipora	patula	Montipora patula	Montipora	patula	encrusting	Pacific	High	3	~60% bleaching	Couch et al. 2017
Montipora capitata	Montipora	capitata	Montipora capitata	Montipora	capitata	branching / encrusting	Pacific	Low	1	~30% bleaching	Couch et al. 2017
Pocillopora damicornis	Pocillopora	damicornis	Pocillopora damicornis	Pocillopora	damicornis	branching	Pacific	High	3	~65% bleaching	Couch et al. 2017
Pocillopora meandrina	Pocillopora	meandrina	Pocillopora meandrina	Pocillopora	meandrina	branching	Pacific	Moderate	2	~45% bleaching	Couch et al. 2017
Pocillopora lingulata	Pocillopora	lingulata	Pocillopora lingulata	Pocillopora	lingulata	branching	Pacific	Low	1	35% bleaching	Couch et al. 2017
Porites lutea	Porites	lutea	Porites lutea	Porites	lutea	massive	Pacific	Moderate	2	~55% bleaching	Couch et al. 2017
Porites lobata / lichen	Porites	lobata / lichen	Porites lobata / lichen	Porites	lobata	massive	Pacific	Low	1	20% bleaching	Couch et al. 2017
Porites compressa	Porites	compressa	Porites compressa	Porites	compressa	branching	Pacific	Low	1	~15% bleaching	Couch et al. 2017
Montipora dilatata	Montipora	dilatata	Montipora dilatata	Montipora	dilatata	encrusting	Pacific	Low	1	~35% bleaching	Couch et al. 2017
Montipora patula	Montipora	patula	Montipora patula	Montipora	patula	encrusting	Pacific	None	0	0% bleaching	Couch et al. 2017
Montipora capitata	Montipora	capitata	Montipora capitata	Montipora	capitata	branching / encrusting	Pacific	Low	1	30% bleaching	Couch et al. 2017
Pocillopora damicornis	Pocillopora	damicornis	Pocillopora damicornis	Pocillopora	damicornis	branching	Pacific	Low	1	~10% bleaching	Couch et al. 2017
Pocillopora meandrina	Pocillopora	meandrina	Pocillopora meandrina	Pocillopora	meandrina	branching	Pacific	Low	1	5% bleaching	Couch et al. 2017
Pocillopora lingulata	Pocillopora	lingulata	Pocillopora lingulata	Pocillopora	lingulata	branching	Pacific	Low	1	~10% bleaching	Couch et al. 2017
Porites lobata / lichen	Porites	lobata / lichen	Porites lobata / lichen	Porites	lobata	massive	Pacific	None	0	0% bleaching	Couch et al. 2017
Montipora dilatata	Montipora	dilatata	Montipora dilatata	Montipora	dilatata	encrusting	Pacific	High	3	70% bleaching	Couch et al. 2017
Montipora patula	Montipora	patula	Montipora patula	Montipora	patula	encrusting	Pacific	High	3	~65% bleaching	Couch et al. 2017
Montipora capitata	Montipora	capitata	Montipora capitata	Montipora	capitata	branching / encrusting	Pacific	Moderate	2	40% bleaching	Couch et al. 2017
Pocillopora damicornis	Pocillopora	damicornis	Pocillopora damicornis	Pocillopora	damicornis	branching	Pacific	Low	1	~25% bleaching	Couch et al. 2017
Pocillopora meandrina	Pocillopora	meandrina	Pocillopora meandrina	Pocillopora	meandrina	branching	Pacific	Low	1	10% bleaching	Couch et al. 2017
Pocillopora lingulata	Pocillopora	lingulata	Pocillopora lingulata	Pocillopora	lingulata	branching	Pacific	Low	1	~15% bleaching	Couch et al. 2017
Porites lutea	Porites	lutea	Porites lutea	Porites	lutea	massive	Pacific	Low	1	10% bleaching	Couch et al. 2017
Porites lobata / lichen	Porites	lobata / lichen	Porites lobata / lichen	Porites	lobata	massive	Pacific	Low	1	<5% bleaching	Couch et al. 2017
Porites compressa	Porites	compressa	Porites compressa	Porites	compressa	branching	Pacific	None	0	0% bleaching	Couch et al. 2017
Astrea	Astrea	sp.	Astrea	Astrea	sp.	massive	Pacific	Low	1	8 Bleaching Susceptibility Index	Dalton et al. 2020
Platygyra	Platygyra	sp.	Platygyra	Platygyra	sp.	massive	Pacific	None	0	1 Bleaching Susceptibility Index	Dalton et al. 2020
Favites	Favites	sp.	Favites	Favites	sp.	massive	Pacific	None	0	2 Bleaching Susceptibility Index	Dalton et al. 2020
Isopora	Isopora	sp.	Isopora	Isopora	sp.	columnar	Pacific	Low	1	9 Bleaching Susceptibility Index	Dalton et al. 2020
Cyphastrea	Cyphastrea	sp.	Cyphastrea	Cyphastrea	sp.	massive	Pacific	Low	1	3 Bleaching Susceptibility Index	Dalton et al. 2020
Acropora	Acropora	sp.	Acropora	Acropora	sp.	branching	Pacific	Low	1	5 Bleaching Susceptibility Index	Dalton et al. 2020
Pocillopora	Pocillopora	sp.	Pocillopora	Pocillopora	sp.	branching	Pacific	Moderate	2	28 Bleaching Susceptibility Index	Dalton et al. 2020
Seriatopora	Seriatopora	sp.	Seriatopora	Seriatopora	sp.	branching	Pacific	Moderate	2	22 Bleaching Susceptibility Index	Dalton et al. 2020
Stylophora	Stylophora	sp.	Stylophora	Stylophora	sp.	branching	Pacific	High	3	29 Bleaching Susceptibility Index	Dalton et al. 2020
Montipora	Montipora	sp.	Montipora	Montipora	sp.	encrusting / plating	Pacific	High	3	45 Bleaching Susceptibility Index	Dalton et al. 2020
Porites	Porites	sp.	Porites	Porites	sp.	massive	Pacific	High	3	36 Bleaching Susceptibility Index	Dalton et al. 2020
Acropora	Acropora	sp.	Acropora	Acropora	sp.	branching	Indian	High	3	20.98 bleaching sensitivity	Darling et al. 2013
Alveopora	Alveopora	sp.	Alveopora	Alveopora	sp.	massive	Indian	High	3	30.83 bleaching sensitivity	Darling et al. 2013
Astreopora	Astreopora	sp.	Astreopora	Astreopora	sp.	massive / encrusting	Indian	Moderate	2	14.31 bleaching sensitivity	Darling et al. 2013
Coscinaraea	Coscinaraea	sp.	Coscinarea	Coscinarea	sp.	encrusting / plating	Indian	Moderate	2	16.04 bleaching sensitivity	Darling et al. 2013
Cyphastrea	Cyphastrea	sp.	Cyphastrea	Cyphastrea	sp.	massive	Indian	Moderate	2	12.03 bleaching sensitivity	Darling et al. 2013
Echinopora	Echinopora	sp.	Echinopora	Echinopora	sp.	plating	Indian	Moderate	2	12.06 bleaching sensitivity	Darling et al. 2013
Echinophyllia	Echinophyllia	sp.	Echinophyllia	Echinophyllia	sp.	plating	Indian	Low	1	6.47 bleaching sensitivity	Darling et al. 2013
Favia	Favia	sp.	Favia	Favia	sp.	massive	Indian	Moderate	2	17.89 bleaching sensitivity	Darling et al. 2013
Favites	Favites	sp.	Favites	Favites	sp.	massive	Indian	Moderate	2	15.73 bleaching sensitivity	Darling et al. 2013
Fungia	Fungia	sp.	Fungia	Fungia	sp.	free-living	Indian	Moderate	2	13.01 bleaching sensitivity	Darling et al. 2013
Galaxea	Galaxea	sp.	Galaxea	Galaxea	sp.	massive	Indian	Moderate	2	11.5 bleaching sensitivity	Darling et al. 2013
Gardineroseris	Gardineroseris	sp.	Gardineroseris	Gardineroseris	sp.	massive	Indian	Low	1	9.64 bleaching sensitivity	Darling et al. 2013
Goniastrea	Goniastrea	sp.	Goniastrea	Goniastrea	sp.	massive	Indian	Moderate	2	17.34 bleaching sensitivity	Darling et al. 2013
Goniopora	Goniopora	sp.	Goniopora	Goniopora	sp.	massive	Indian	Moderate	2	16.15 bleaching sensitivity	Darling et al. 2013
Herpolitha	Herpolitha	sp.	Herpolitha	Herpolitha	sp.	free-living	Indian	Low	1	4.42 bleaching sensitivity	Darling et al. 2013
Hydnophora	Hydnophora	sp.	Hydnophora	Hydnophora	sp.	massive	Indian	Moderate	2	10.37 bleaching sensitivity	Darling et al. 2013
Leptastrea	Leptastrea	sp.	Leptastrea	Leptastrea	sp.	encrusting	Indian	Low	1	9.12 bleaching sensitivity	Darling et al. 2013
Leptoria	Leptoria	sp.	Leptoria	Leptoria	sp.	massive	Indian	Moderate	2	17.95 bleaching sensitivity	Darling et al. 2013
Lobophyllia	Lobophyllia	sp.	Lobophyllia	Lobophyllia	sp.	encrusting	Indian	Moderate	2	14.89 bleaching sensitivity	Darling et al. 2013
Montastraea	Montastraea	sp.	Montastrea	Montastrea	sp.	massive	Indian	Low	1	6.79 bleaching sensitivity	Darling et al. 2013
Montipora	Montipora	sp.	Montipora	Montipora	sp.	encrusting / plating	Indian	High	3	27.76 bleaching sensitivity	Darling et al. 2013
Pavona	Pavona	sp.	Pavona	Pavona	sp.	massive / encrusting	Indian	Low	1	8.21 bleaching sensitivity	Darling et al. 2013
Platygyra	Platygyra	sp.	Platygyra	Platygyra	sp.	massive	Indian	Moderate	2	13.48 bleaching sensitivity	Darling et al. 2013
Plesiastrea	Plesiastrea	sp.	Plesiastrea	Plesiastrea	sp.	encrusting	Indian	Moderate	2	17.26 bleaching sensitivity	Darling et al. 2013
Pocillopora	Pocillopora	sp.	Pocillopora	Pocillopora	sp.	branching	Indian	High	3	23.43 bleaching sensitivity	Darling et al. 2013
Porites	Porites	sp.	Porites (branching)	Porites	sp.	branching	Indian	High	3	21.85 bleaching sensitivity	Darling et al. 2013
Porites	Porites	sp.	Porites (massive)	Porites	sp.	massive	Indian	Moderate	2	11.5 bleaching sensitivity	Darling et al. 2013
Psammocora	Psammocora	sp.	Psammocora	Psammocora	sp.	encrusting	Indian	Low	1	5.58 bleaching sensitivity	Darling et al. 2013
Seriatopora	Seriatopora	sp.	Seriatopora	Seriatopora	sp.	branching	Indian	Moderate	2	16.71 bleaching sensitivity	Darling et al. 2013
Stylophora	Stylophora	sp.	Stylophora	Stylophora	sp.	branching	Indian	High	3	30.34 bleaching sensitivity	Darling et al. 2013
Turbinaria	Turbinaria	sp.	Turbinaria	Turbinaria	sp.	plating	Indian	Moderate	2	12.97 bleaching sensitivity	Darling et al. 2013
Acropora	Acropora	spp.	Acropora	Acropora	spp.	branching	Indian	Severe	4	29% totally bleached; 54% partially bleached	Davies et al. 1997
Montipora	Montipora	spp.	Montipora	Montipora	spp.	encrusting / plating	Indian	High	3	39% totally bleached; 15% partially bleached	Davies et al. 1997
Pocillopora	Pocillopora	spp.	Pocillopora	Pocillopora	spp.	branching	Indian	Moderate	2	21% totally bleached; 10% partially bleached	Davies et al. 1997
Porites	Porites	spp.	Porites	Porites	spp.	massive	Indian	Low	1	0% totally bleached; 7% partially bleached	Davies et al. 1997
Pocillopora	Pocillopora	spp.	Pocillopora	Pocillopora	spp.	branching	Indian	Severe	4	n/a (qualitative)	Eriksson et al. 2012
Acropora	Acropora	spp.	Acropora (table)	Acropora	spp.	table / branching	Indian	High	3	n/a (qualitative)	Eriksson et al. 2012
Galaxea	Galaxea	spp.	Galaxea	Galaxea	spp.	massive	Indian	High	3	n/a (qualitative)	Eriksson et al. 2012
Fungia	Fungia	spp.	Fungia	Fungia	spp.	free-living	Indian	High	3	n/a (qualitative)	Eriksson et al. 2012
Acropora	Acropora	spp.	Acropora (branching)	Acropora	spp.	branching	Indian	Moderate	2	n/a (qualitative)	Eriksson et al. 2012
Acropora	Acropora	spp.	Acropora (digitate)	Acropora	spp.	digitate	Indian	Moderate	2	n/a (qualitative)	Eriksson et al. 2012
Porites	Porites	spp.	Porites	Porites	spp.	branching / massive	Indian	Low	1	n/a (qualitative)	Eriksson et al. 2012
Porites	Porites	sp.	Porites	Porites	sp.	massive	Pacific	Low	1	35% bleached or recently dead	Frade et al. 2018
Porites	Porites	sp.	Porites	Porites	sp.	massive	Pacific	Low	1	30% bleached or recently dead	Frade et al. 2018
Porites	Porites	sp.	Porites	Porites	sp.	massive	Pacific	Low	1	30% bleached or recently dead	Frade et al. 2018
Porites	Porites	sp.	Porites	Porites	sp.	massive	Pacific	Low	1	35% bleached or recently dead	Frade et al. 2018
Leptoseris	Leptoseris	sp.	Leptoseris	Leptoseris	sp.	encrusting	Pacific	None	0	0% bleached or recently dead	Frade et al. 2018
Leptoseris	Leptoseris	sp.	Leptoseris	Leptoseris	sp.	encrusting	Pacific	Moderate	2	50% bleached or recently dead	Frade et al. 2018
Leptoseris	Leptoseris	sp.	Leptoseris	Leptoseris	sp.	encrusting	Pacific	Low	1	30% bleached or recently dead	Frade et al. 2018
Leptoseris	Leptoseris	sp.	Leptoseris	Leptoseris	sp.	encrusting	Pacific	Low	1	30% bleached or recently dead	Frade et al. 2018
Acropora	Acropora	sp.	Acropora	Acropora	sp.	branching	Pacific	Severe	4	80% bleached or recently dead	Frade et al. 2018
Acropora	Acropora	sp.	Acropora	Acropora	sp.	branching	Pacific	High	3	70% bleached or recently dead	Frade et al. 2018
Acropora	Acropora	sp.	Acropora	Acropora	sp.	branching	Pacific	High	3	65% bleached or recently dead	Frade et al. 2018
Acropora	Acropora	sp.	Acropora	Acropora	sp.	branching	Pacific	Moderate	2	40% bleached or recently dead	Frade et al. 2018
Pocillopora	Pocillopora	sp.	Pocillopora	Pocillopora	sp.	branching	Pacific	Severe	4	85% bleached or recently dead	Frade et al. 2018
Pocillopora	Pocillopora	sp.	Pocillopora	Pocillopora	sp.	branching	Pacific	High	3	70% bleached or recently dead	Frade et al. 2018
Pocillopora	Pocillopora	sp.	Pocillopora	Pocillopora	sp.	branching	Pacific	Severe	4	80% bleached or recently dead	Frade et al. 2018
Pocillopora	Pocillopora	sp.	Pocillopora	Pocillopora	sp.	branching	Pacific	High	3	60% bleached or recently dead	Frade et al. 2018
Favites	Favites	sp.	Favites	Favites	sp.	massive	Pacific	Severe	4	90% bleached or recently dead	Frade et al. 2018
Favites	Favites	sp.	Favites	Favites	sp.	massive	Pacific	Severe	4	85% bleached or recently dead	Frade et al. 2018
Favites	Favites	sp.	Favites	Favites	sp.	massive	Pacific	Severe	4	80% bleached or recently dead	Frade et al. 2018
Favites	Favites	sp.	Favites	Favites	sp.	massive	Pacific	Moderate	2	60% bleached or recently dead	Frade et al. 2018
Goniastrea	Goniastrea	sp.	Goniastrea	Goniastrea	sp.	massive	Pacific	Severe	4	100% bleached or recently dead	Frade et al. 2018
Goniastrea	Goniastrea	sp.	Goniastrea	Goniastrea	sp.	massive	Pacific	Severe	4	85% bleached or recently dead	Frade et al. 2018
Goniastrea	Goniastrea	sp.	Goniastrea	Goniastrea	sp.	massive	Pacific	Severe	4	85% bleached or recently dead	Frade et al. 2018
Goniastrea	Goniastrea	sp.	Goniastrea	Goniastrea	sp.	massive	Pacific	Severe	4	85% bleached or recently dead	Frade et al. 2018
Lobophyllia	Lobophyllia	sp.	Lobophyllia	Lobophyllia	sp.	encrusting	Pacific	Severe	4	85% bleached or recently dead	Frade et al. 2018
Lobophyllia	Lobophyllia	sp.	Lobophyllia	Lobophyllia	sp.	encrusting	Pacific	Severe	4	95% bleached or recently dead	Frade et al. 2018
Lobophyllia	Lobophyllia	sp.	Lobophyllia	Lobophyllia	sp.	encrusting	Pacific	Severe	4	90% bleached or recently dead	Frade et al. 2018
Lobophyllia	Lobophyllia	sp.	Lobophyllia	Lobophyllia	sp.	encrusting	Pacific	Moderate	2	50% bleached or recently dead	Frade et al. 2018
Montipora	Montipora	sp.	Montipora	Montipora	sp.	encrusting / plating	Pacific	Severe	4	90% bleached or recently dead	Frade et al. 2018
Montipora	Montipora	sp.	Montipora	Montipora	sp.	encrusting / plating	Pacific	Severe	4	85% bleached or recently dead	Frade et al. 2018
Montipora	Montipora	sp.	Montipora	Montipora	sp.	encrusting / plating	Pacific	Severe	4	90% bleached or recently dead	Frade et al. 2018
Montipora	Montipora	sp.	Montipora	Montipora	sp.	encrusting / plating	Pacific	Severe	4	80% bleached or recently dead	Frade et al. 2018
Isopora	Isopora	sp.	Isopora	Isopora	sp.	columnar	Pacific	Severe	4	95% bleached or recently dead	Frade et al. 2018
Isopora	Isopora	sp.	Isopora	Isopora	sp.	columnar	Pacific	Severe	4	100% bleached or recently dead	Frade et al. 2018
Stylophora	Stylophora	sp.	Stylophora	Stylophora	sp.	branching	Pacific	Severe	4	95% bleached or recently dead	Frade et al. 2018
Stylophora	Stylophora	sp.	Stylophora	Stylophora	sp.	branching	Pacific	Severe	4	90% bleached or recently dead	Frade et al. 2018
Stylophora	Stylophora	sp.	Stylophora	Stylophora	sp.	branching	Pacific	Severe	4	85% bleached or recently dead	Frade et al. 2018
Stylophora	Stylophora	sp.	Stylophora	Stylophora	sp.	branching	Pacific	Severe	4	85% bleached or recently dead	Frade et al. 2018
Dipsastraea	Dipsastraea	sp.	Dipsastraea	Dipsastraea	sp.	massive	Pacific	Severe	4	85% bleached or recently dead	Frade et al. 2018
Dipsastraea	Dipsastraea	sp.	Dipsastraea	Dipsastraea	sp.	massive	Pacific	Severe	4	85% bleached or recently dead	Frade et al. 2018
Dipsastraea	Dipsastraea	sp.	Dipsastraea	Dipsastraea	sp.	massive	Pacific	Severe	4	85% bleached or recently dead	Frade et al. 2018
Dipsastraea	Dipsastraea	sp.	Dipsastraea	Dipsastraea	sp.	massive	Pacific	Moderate	2	40% bleached or recently dead	Frade et al. 2018
Pachyseris	Pachyseris	sp.	Pachyseris	Pachyseris	sp.	plating	Pacific	Severe	4	100% bleached or recently dead	Frade et al. 2018
Pachyseris	Pachyseris	sp.	Pachyseris	Pachyseris	sp.	plating	Pacific	Severe	4	90% bleached or recently dead	Frade et al. 2018
Pachyseris	Pachyseris	sp.	Pachyseris	Pachyseris	sp.	plating	Pacific	Moderate	2	45% bleached or recently dead	Frade et al. 2018
Seriatopora	Seriatopora	sp.	Seriatopora	Seriatopora	sp.	branching	Pacific	Severe	4	100% bleached or recently dead	Frade et al. 2018
Seriatopora	Seriatopora	sp.	Seriatopora	Seriatopora	sp.	branching	Pacific	Severe	4	100% bleached or recently dead	Frade et al. 2018
Seriatopora	Seriatopora	sp.	Seriatopora	Seriatopora	sp.	branching	Pacific	Severe	4	100% bleached or recently dead	Frade et al. 2018
Seriatopora	Seriatopora	sp.	Seriatopora	Seriatopora	sp.	branching	Pacific	Severe	4	85% bleached or recently dead	Frade et al. 2018
Orbicella faveolata	Orbicella	faveolata	Orbicella faveolata	Orbicella	faveolata	massive / encrusting	Atlantic	Moderate	2	36.1% bleached	Gintert et al. 2018
Siderastrea siderea	Siderastrea	siderea	Siderastrea siderea	Siderastrea	siderea	massive	Atlantic	Low	1	1% bleached	Gintert et al. 2018
Orbicella annularis	Orbicella	annularis	Orbicella annularis	Orbicella	annularis	massive	Atlantic	High	3	74.1% bleached	Gintert et al. 2018
Porites astreoides	Porites	astreoides	Porites astreoides	Porites	astreoides	massive / encrusting	Atlantic	Low	1	6.6% bleached	Gintert et al. 2018
Colpophyllia natans	Colpophyllia	natans	Colpophyllia natans	Colpophyllia	natans	massive / encrusting	Atlantic	Moderate	2	57.4% bleached	Gintert et al. 2018
Porites porites	Porites	porites	Porites porites	Porites	porites	branching	Atlantic	High	3	63.4% bleached	Gintert et al. 2018
Montastraea cavernosa	Montastraea	cavernosa	Montastraea cavernosa	Montastraea	cavernosa	massive	Atlantic	Moderate	2	36.7% bleached	Gintert et al. 2018
Diploria labyrinthiformis	Diploria	labyrinthiformis	Diploria labyrinthiformis	Diploria	labyrinthiformis	massive	Atlantic	Moderate	2	48.3% bleached	Gintert et al. 2018
Orbicella faveolata	Orbicella	faveolata	Orbicella faveolata	Orbicella	faveolata	massive / encrusting	Atlantic	Low	1	5.7% bleached	Gintert et al. 2018
Siderastrea siderea	Siderastrea	siderea	Siderastrea siderea	Siderastrea	siderea	massive	Atlantic	Low	1	1.6% bleached	Gintert et al. 2018
Orbicella annularis	Orbicella	annularis	Orbicella annularis	Orbicella	annularis	massive	Atlantic	Moderate	2	30.1% bleached	Gintert et al. 2018
Porites astreoides	Porites	astreoides	Porites astreoides	Porites	astreoides	massive / encrusting	Atlantic	Low	1	1.2% bleached	Gintert et al. 2018
Colpophyllia natans	Colpophyllia	natans	Colpophyllia natans	Colpophyllia	natans	massive / encrusting	Atlantic	Low	1	3.1% bleached	Gintert et al. 2018
Porites porites	Porites	porites	Porites porites	Porites	porites	branching	Atlantic	Low	1	7.5% bleached	Gintert et al. 2018
Montastraea cavernosa	Montastraea	cavernosa	Montastraea cavernosa	Montastraea	cavernosa	massive	Atlantic	None	0	0% bleached	Gintert et al. 2018
Diploria labyrinthiformis	Diploria	labyrinthiformis	Diploria labyrinthiformis	Diploria	labyrinthiformis	massive	Atlantic	Low	1	5.7% bleached	Gintert et al. 2018
Acropora hyacinthus	Acropora	hyacinthus	Acropora hyacinthus	Acropora	hyacinthus	table / branching	Pacific	High	3	~53% of colonies completely bleached	Gleason 1993
Acropora gemmifera	Acropora	gemmifera	Acropora gemmifera	Acropora	gemmifera	corymbose	Pacific	High	3	~57% of colonies completely bleached	Gleason 1993
Acropora	Acropora	spp.	Acropora spp.	Acropora	spp.	branching	Pacific	Severe	4	67% of total colonies completely bleached	Gleason 1993
Acropora verweyi	Acropora	verweyi	Acropora verweyii	Acropora	verweyii	branching	Pacific	None	0	unaffected	Gleason 1993
Acropora latistella	Acropora	latistella	Acropora latistella	Acropora	latistella	branching	Pacific	None	0	unaffected	Gleason 1993
Pocillopora meandrina	Pocillopora	meandrina	Pocillopora meandrina	Pocillopora	meandrina	branching	Pacific	Low	1	mostly unaffected or partially bleached	Gleason 1993
Pocillopora verrucosa	Pocillopora	verrucosa	Pocillopora verrucosa	Pocillopora	verrucosa	branching	Pacific	Low	1	mostly unaffected or partially bleached	Gleason 1993
Pocillopora grandis	Pocillopora	grandis	Pocillopora eydouxi	Pocillopora	eydouxi	branching	Pacific	Low	1	mostly unaffected or partially bleached	Gleason 1993
Pocillopora	Pocillopora	spp.	Pocillopora spp.	Pocillopora	spp.	branching	Pacific	Low	1	8% of total colonies completely bleached	Gleason 1993
Montastraea	Montastraea	sp.	Montastrea	Montastrea	sp.	massive	Pacific	Severe	4	88% of colonies completely bleached	Gleason 1993
Montipora	Montipora	sp.	Montipora	Montipora	sp.	encrusting / plating	Pacific	High	3	45% of colonies completely bleached	Gleason 1993
Porites	Porites	sp.	Porites	Porites	sp.	branching / massive	Pacific	Low	1	mostly unaffected	Gleason 1993
Pavona	Pavona	sp.	Pavona	Pavona	sp.	massive / encrusting	Pacific	None	0	unaffected	Gleason 1993
Leptastrea	Leptastrea	sp.	Leptastrea	Leptastrea	sp.	encrusting	Pacific	None	0	unaffected	Gleason 1993
Pocillopora damicornis	Pocillopora	damicornis	Pocillopora damicornis	Pocillopora	damicornis	branching	Pacific	Low	1	<20% bleached	Glynn et al. 2001
Pocillopora elegans	Pocillopora	elegans	Pocillopora elegans	Pocillopora	elegans	branching	Pacific	Low	1	0-10% bleached	Glynn et al. 2001
Pavona clavus	Pavona	clavus	Pavona clavus	Pavona	clavus	branching	Pacific	Moderate	2	~20-55% bleached	Glynn et al. 2001
Pavona gigantea	Pavona	gigantea	Pavona gigantea	Pavona	gigantea	massive	Pacific	Moderate	2	20-60% bleached	Glynn et al. 2001
Porites lobata	Porites	lobata	Porites lobata	Porites	lobata	massive	Pacific	High	3	40-85% bleached	Glynn et al. 2001
Pocillopora damicornis	Pocillopora	damicornis	Pocillopora damicornis	Pocillopora	damicornis	branching	Pacific	High	3	~25-75% bleached	Glynn et al. 2001
Pocillopora elegans	Pocillopora	elegans	Pocillopora elegans	Pocillopora	elegans	branching	Pacific	Moderate	2	0-50% bleached	Glynn et al. 2001
Pavona clavus	Pavona	clavus	Pavona clavus	Pavona	clavus	branching	Pacific	High	3	50-75% bleached	Glynn et al. 2001
Pavona gigantea	Pavona	gigantea	Pavona gigantea	Pavona	gigantea	massive	Pacific	High	3	40-90% bleached	Glynn et al. 2001
Porites lobata	Porites	lobata	Porites lobata	Porites	lobata	massive	Pacific	Mixed	n/a	0-100% bleached	Glynn et al. 2001
Pocillopora damicornis	Pocillopora	damicornis	Pocillopora damicornis	Pocillopora	damicornis	branching	Pacific	Moderate	2	0-50% bleached	Glynn et al. 2001
Pocillopora elegans	Pocillopora	elegans	Pocillopora elegans	Pocillopora	elegans	branching	Pacific	Moderate	2	0-50% bleached	Glynn et al. 2001
Pavona clavus	Pavona	clavus	Pavona clavus	Pavona	clavus	branching	Pacific	Low	1	0-35% bleached	Glynn et al. 2001
Pavona gigantea	Pavona	gigantea	Pavona gigantea	Pavona	gigantea	massive	Pacific	Moderate	2	0-50% bleached	Glynn et al. 2001
Acropora	Acropora	sp.	Acropora	Acropora	sp.	table / branching	Pacific	Severe	4	97 (Bleaching Mortality Index)	Guest et al. 2012
Pocillopora	Pocillopora	sp.	Pocillopora	Pocillopora	sp.	branching	Pacific	Severe	4	93 (Bleaching Mortality Index)	Guest et al. 2012
Hydnophora	Hydnophora	sp.	Hydnophora	Hydnophora	sp.	massive	Pacific	Severe	4	81 (Bleaching Mortality Index)	Guest et al. 2012
Echinopora	Echinopora	sp.	Echinopora	Echinopora	sp.	plating	Pacific	High	3	77 (Bleaching Mortality Index)	Guest et al. 2012
Favites	Favites	sp.	Favites	Favites	sp.	massive	Pacific	High	3	71 (Bleaching Mortality Index)	Guest et al. 2012
Lobophyllia	Lobophyllia	sp.	Symphyllia	Symphyllia	sp.	encrusting	Pacific	High	3	71 (Bleaching Mortality Index)	Guest et al. 2012
Platygyra	Platygyra	sp.	Platygyra	Platygyra	sp.	massive	Pacific	High	3	70 (Bleaching Mortality Index)	Guest et al. 2012
Galaxea	Galaxea	sp.	Galaxea	Galaxea	sp.	massive	Pacific	High	3	70 (Bleaching Mortality Index)	Guest et al. 2012
Favia	Favia	sp.	Favia	Favia	sp.	massive	Pacific	High	3	68 (Bleaching Mortality Index)	Guest et al. 2012
Porites	Porites	sp.	Porites (branching)	Porites	sp.	branching	Pacific	High	3	68 (Bleaching Mortality Index)	Guest et al. 2012
Fungia	Fungia	sp.	Fungia	Fungia	sp.	free-living	Pacific	High	3	62 (Bleaching Mortality Index)	Guest et al. 2012
Pavona	Pavona	sp.	Pavona	Pavona	sp.	massive / encrusting	Pacific	High	3	61 (Bleaching Mortality Index)	Guest et al. 2012
Goniastrea	Goniastrea	sp.	Goniastrea	Goniastrea	sp.	massive	Pacific	Moderate	2	51 (Bleaching Mortality Index)	Guest et al. 2012
Cyphastrea	Cyphastrea	sp.	Cyphastrea	Cyphastrea	sp.	massive	Pacific	Moderate	2	50 (Bleaching Mortality Index)	Guest et al. 2012
Goniopora	Goniopora	sp.	Goniopora	Goniopora	sp.	massive	Pacific	Moderate	2	48 (Bleaching Mortality Index)	Guest et al. 2012
Montastraea	Montastraea	sp.	Montastrea	Montastrea	sp.	massive	Pacific	Moderate	2	41 (Bleaching Mortality Index)	Guest et al. 2012
Montipora	Montipora	sp.	Montipora	Montipora	sp.	encrusting / plating	Pacific	Low	1	32 (Bleaching Mortality Index)	Guest et al. 2012
Porites	Porites	sp.	Porites (massive)	Porites	sp.	massive	Pacific	Low	1	31 (Bleaching Mortality Index)	Guest et al. 2012
Diploastrea	Diploastrea	sp.	Diploastrea	Diploastrea	sp.	massive	Pacific	Low	1	30 (Bleaching Mortality Index)	Guest et al. 2012
Acropora	Acropora	sp.	Acropora	Acropora	sp.	table / branching	Pacific	Low	1	5 (Bleaching Mortality Index)	Guest et al. 2012
Pocillopora	Pocillopora	sp.	Pocillopora	Pocillopora	sp.	branching	Pacific	Low	1	12 (Bleaching Mortality Index)	Guest et al. 2012
Hydnophora	Hydnophora	sp.	Hydnophora	Hydnophora	sp.	massive	Pacific	Low	1	11 (Bleaching Mortality Index)	Guest et al. 2012
Echinopora	Echinopora	sp.	Echinopora	Echinopora	sp.	plating	Pacific	Low	1	15 (Bleaching Mortality Index)	Guest et al. 2012
Favites	Favites	sp.	Favites	Favites	sp.	massive	Pacific	Low	1	8 (Bleaching Mortality Index)	Guest et al. 2012
Lobophyllia	Lobophyllia	sp.	Symphyllia	Symphyllia	sp.	encrusting	Pacific	Low	1	20 (Bleaching Mortality Index)	Guest et al. 2012
Platygyra	Platygyra	sp.	Platygyra	Platygyra	sp.	massive	Pacific	Low	1	11 (Bleaching Mortality Index)	Guest et al. 2012
Galaxea	Galaxea	sp.	Galaxea	Galaxea	sp.	massive	Pacific	None	0	0 (Bleaching Mortality Index)	Guest et al. 2012
Favia	Favia	sp.	Favia	Favia	sp.	massive	Pacific	Low	1	2 (Bleaching Mortality Index)	Guest et al. 2012
Porites	Porites	sp.	Porites (branching)	Porites	sp.	branching	Pacific	Moderate	2	50 (Bleaching Mortality Index)	Guest et al. 2012
Fungia	Fungia	sp.	Fungia	Fungia	sp.	free-living	Pacific	Low	1	17 (Bleaching Mortality Index)	Guest et al. 2012
Pavona	Pavona	sp.	Pavona	Pavona	sp.	massive / encrusting	Pacific	None	0	0 (Bleaching Mortality Index)	Guest et al. 2012
Goniastrea	Goniastrea	sp.	Goniastrea	Goniastrea	sp.	massive	Pacific	Low	1	6 (Bleaching Mortality Index)	Guest et al. 2012
Cyphastrea	Cyphastrea	sp.	Cyphastrea	Cyphastrea	sp.	massive	Pacific	None	0	0 (Bleaching Mortality Index)	Guest et al. 2012
Goniopora	Goniopora	sp.	Goniopora	Goniopora	sp.	massive	Pacific	Low	1	6 (Bleaching Mortality Index)	Guest et al. 2012
Montastraea	Montastraea	sp.	Montastrea	Montastrea	sp.	massive	Pacific	Low	1	17 (Bleaching Mortality Index)	Guest et al. 2012
Montipora	Montipora	sp.	Montipora	Montipora	sp.	encrusting / plating	Pacific	Low	1	14 (Bleaching Mortality Index)	Guest et al. 2012
Porites	Porites	sp.	Porites (massive)	Porites	sp.	massive	Pacific	Low	1	18 (Bleaching Mortality Index)	Guest et al. 2012
Diploastrea	Diploastrea	sp.	Diploastrea	Diploastrea	sp.	massive	Pacific	None	0	0 (Bleaching Mortality Index)	Guest et al. 2012
Acropora	Acropora	sp.	Acropora	Acropora	sp.	table / branching	Pacific	Low	1	28 (Bleaching Mortality Index)	Guest et al. 2012
Pocillopora	Pocillopora	sp.	Pocillopora	Pocillopora	sp.	branching	Pacific	Moderate	2	46 (Bleaching Mortality Index)	Guest et al. 2012
Hydnophora	Hydnophora	sp.	Hydnophora	Hydnophora	sp.	massive	Pacific	None	0	0 (Bleaching Mortality Index)	Guest et al. 2012
Echinopora	Echinopora	sp.	Echinopora	Echinopora	sp.	plating	Pacific	None	0	0 (Bleaching Mortality Index)	Guest et al. 2012
Favites	Favites	sp.	Favites	Favites	sp.	massive	Pacific	Low	1	3 (Bleaching Mortality Index)	Guest et al. 2012
Lobophyllia	Lobophyllia	sp.	Symphyllia	Symphyllia	sp.	encrusting	Pacific	Low	1	5 (Bleaching Mortality Index)	Guest et al. 2012
Platygyra	Platygyra	sp.	Platygyra	Platygyra	sp.	massive	Pacific	Low	1	7 (Bleaching Mortality Index)	Guest et al. 2012
Galaxea	Galaxea	sp.	Galaxea	Galaxea	sp.	massive	Pacific	Low	1	4 (Bleaching Mortality Index)	Guest et al. 2012
Favia	Favia	sp.	Favia	Favia	sp.	massive	Pacific	None	0	0 (Bleaching Mortality Index)	Guest et al. 2012
Porites	Porites	sp.	Porites (branching)	Porites	sp.	branching	Pacific	Moderate	2	46 (Bleaching Mortality Index)	Guest et al. 2012
Fungia	Fungia	sp.	Fungia	Fungia	sp.	free-living	Pacific	Low	1	20 (Bleaching Mortality Index)	Guest et al. 2012
Pavona	Pavona	sp.	Pavona	Pavona	sp.	massive / encrusting	Pacific	Low	1	23 (Bleaching Mortality Index)	Guest et al. 2012
Goniastrea	Goniastrea	sp.	Goniastrea	Goniastrea	sp.	massive	Pacific	Low	1	6 (Bleaching Mortality Index)	Guest et al. 2012
Cyphastrea	Cyphastrea	sp.	Cyphastrea	Cyphastrea	sp.	massive	Pacific	Low	1	4 (Bleaching Mortality Index)	Guest et al. 2012
Goniopora	Goniopora	sp.	Goniopora	Goniopora	sp.	massive	Pacific	None	0	0 (Bleaching Mortality Index)	Guest et al. 2012
Montastraea	Montastraea	sp.	Montastrea	Montastrea	sp.	massive	Pacific	Low	1	3 (Bleaching Mortality Index)	Guest et al. 2012
Montipora	Montipora	sp.	Montipora	Montipora	sp.	encrusting / plating	Pacific	Low	1	19 (Bleaching Mortality Index)	Guest et al. 2012
Porites	Porites	sp.	Porites (massive)	Porites	sp.	massive	Pacific	Low	1	9 (Bleaching Mortality Index)	Guest et al. 2012
Diploastrea	Diploastrea	sp.	Diploastrea	Diploastrea	sp.	massive	Pacific	None	0	0 (Bleaching Mortality Index)	Guest et al. 2012
Acropora	Acropora	spp.	Acropora	Acropora	spp.	table / branching	Pacific	Low	1	0% severely bleached; 9 Bleaching Index	Guest et al. 2016
Galaxea	Galaxea	spp.	Galaxea	Galaxea	spp.	massive	Pacific	Low	1	0% severely bleached; 10 Bleaching Index	Guest et al. 2016
Pavona	Pavona	spp.	Pavona	Pavona	spp.	massive / encrusting	Pacific	Low	1	0% severely bleached; 11 Bleaching Index	Guest et al. 2016
Merulina	Merulina	spp.	Merulina	Merulina	spp.	plating	Pacific	Low	1	0% severely bleached; 17 Bleaching Index	Guest et al. 2016
Favites	Favites	spp.	Favites	Favites	spp.	massive	Pacific	Low	1	12% severely bleached; 37 Bleaching Index	Guest et al. 2016
Echinopora	Echinopora	spp.	Echinopora	Echinopora	spp.	plating	Pacific	Moderate	2	7% severely bleached; 39 Bleaching Index	Guest et al. 2016
Favia	Favia	spp.	Favia	Favia	spp.	massive	Pacific	Moderate	2	17% severely bleached; 46 Bleaching Index	Guest et al. 2016
Platygyra	Platygyra	spp.	Platygyra	Platygyra	spp.	massive	Pacific	Moderate	2	33% severely bleached; 47 Bleaching Index	Guest et al. 2016
Goniastrea	Goniastrea	spp.	Goniastrea	Goniastrea	spp.	massive	Pacific	Moderate	2	15% severely bleached; 34 Bleaching Index	Guest et al. 2016
Porites	Porites	spp.	Porites	Porites	spp.	branching / massive	Pacific	Moderate	2	35% severely bleached; 44 Bleaching Index	Guest et al. 2016
Lobophyllia	Lobophyllia	spp.	Symphyllia	Symphyllia	spp.	encrusting	Pacific	Moderate	2	8% severely bleached; 46 Bleaching Index	Guest et al. 2016
Pocillopora	Pocillopora	spp.	Pocillopora	Pocillopora	spp.	branching	Pacific	High	3	20% severely bleached; 60 Bleaching Index	Guest et al. 2016
Ctenactis	Ctenactis	spp.	Ctenactis	Ctenactis	spp.	free-living	Pacific	High	3	60% severely bleached; 60 Bleaching Index	Guest et al. 2016
Montipora	Montipora	spp.	Montipora	Montipora	spp.	encrusting / plating	Pacific	Moderate	2	49% severely bleached; 56 Bleaching Index	Guest et al. 2016
Hydnophora	Hydnophora	spp.	Hydnophora	Hydnophora	spp.	massive	Pacific	High	3	30% severely bleached; 60 Bleaching Index	Guest et al. 2016
Pectinia	Pectinia	spp.	Pectinia	Pectinia	spp.	branching / plating	Pacific	Moderate	2	22% severely bleached; 49 Bleaching Index	Guest et al. 2016
Fungia	Fungia	spp.	Fungia	Fungia	spp.	free-living	Pacific	Moderate	2	30% severely bleached; 56 Bleaching Index	Guest et al. 2016
Podabacia	Podabacia	spp.	Podabacia	Podabacia	spp.	encrusting / plating	Pacific	High	3	71% severely bleached; 79 Bleaching Index	Guest et al. 2016
Pachyseris	Pachyseris	spp.	Pachyseris	Pachyseris	spp.	plating	Pacific	Severe	4	85% severely bleached; 89 Bleaching Index	Guest et al. 2016
Acropora	Acropora	sp.	Acropora	Acropora	sp.	branching	Pacific	Low	1	15% bleached or pale	Hédouin et al. 2020
Astrea	Astrea	sp.	Astrea	Astrea	sp.	massive	Pacific	Severe	4	100% bleached or pale	Hédouin et al. 2020
Montipora	Montipora	sp.	Montipora	Montipora	sp.	encrusting / plating	Pacific	High	3	75% bleached or pale	Hédouin et al. 2020
Pavona	Pavona	sp.	Pavona	Pavona	sp.	massive / encrusting	Pacific	None	0	0% bleached or pale	Hédouin et al. 2020
Pocillopora	Pocillopora	sp.	Pocillopora	Pocillopora	sp.	branching	Pacific	High	3	65% bleached or pale	Hédouin et al. 2020
Porites	Porites	sp.	Porites	Porites	sp.	branching / massive	Pacific	Low	1	20% bleached or pale	Hédouin et al. 2020
Acropora	Acropora	sp.	Acropora	Acropora	sp.	branching	Pacific	Low	1	10% bleached or pale	Hédouin et al. 2020
Astrea	Astrea	sp.	Astrea	Astrea	sp.	massive	Pacific	Severe	4	99% bleached or pale	Hédouin et al. 2020
Montipora	Montipora	sp.	Montipora	Montipora	sp.	encrusting / plating	Pacific	Moderate	2	40% bleached or pale	Hédouin et al. 2020
Pavona	Pavona	sp.	Pavona	Pavona	sp.	massive / encrusting	Pacific	None	0	0% bleached or pale	Hédouin et al. 2020
Pocillopora	Pocillopora	sp.	Pocillopora	Pocillopora	sp.	branching	Pacific	High	3	65% bleached or pale	Hédouin et al. 2020
Porites	Porites	sp.	Porites	Porites	sp.	branching / massive	Pacific	Low	1	20% bleached or pale	Hédouin et al. 2020
Acropora	Acropora	sp.	Acropora	Acropora	sp.	branching	Pacific	Moderate	2	40% bleached or pale	Hédouin et al. 2020
Astrea	Astrea	sp.	Astrea	Astrea	sp.	massive	Pacific	Severe	4	100% bleached or pale	Hédouin et al. 2020
Montipora	Montipora	sp.	Montipora	Montipora	sp.	encrusting / plating	Pacific	Severe	4	95% bleached or pale	Hédouin et al. 2020
Pavona	Pavona	sp.	Pavona	Pavona	sp.	massive / encrusting	Pacific	None	0	0% bleached or pale	Hédouin et al. 2020
Pocillopora	Pocillopora	sp.	Pocillopora	Pocillopora	sp.	branching	Pacific	High	3	70% bleached or pale	Hédouin et al. 2020
Porites	Porites	sp.	Porites	Porites	sp.	branching / massive	Pacific	Low	1	10% bleached or pale	Hédouin et al. 2020
Pocillopora	Pocillopora	spp.	Pocillopora	Pocillopora	spp.	branching	Pacific	High	3	73.9-92.1% partly or completely bleached	Hoegh-Guldberg & Salvat 1995
Acropora	Acropora	spp.	Acropora	Acropora	spp.	branching	Pacific	Severe	4	89-100% mostly completely bleached	Hoegh-Guldberg & Salvat 1995
Porites	Porites	spp.	Porites	Porites	spp.	massive	Pacific	Low	1	12.9-42.5% partly or completely bleached	Hoegh-Guldberg & Salvat 1995
Fungia	Fungia	spp.	Fungia	Fungia	spp.	free-living	Pacific	Severe	4	89-100% mostly completely bleached	Hoegh-Guldberg & Salvat 1995
Montastraea	Montastraea	spp.	Montastrea	Montastrea	spp.	massive	Pacific	Moderate	2	20-50% mostly partly bleached	Hoegh-Guldberg & Salvat 1995
Montipora	Montipora	spp.	Montipora	Montipora	spp.	encrusting / plating	Pacific	Moderate	2	20-50% mostly partly bleached	Hoegh-Guldberg & Salvat 1995
Goniastrea	Goniastrea	spp.	Goniastrea	Goniastrea	spp.	massive	Pacific	Moderate	2	20-50% mostly partly bleached	Hoegh-Guldberg & Salvat 1995
Porites	Porites	sp.	Porites	Porites	sp.	branching / massive	Indian	Moderate	2	55% bleached or partially bleached	Hussain & Ingole 2020
Cyphastrea	Cyphastrea	sp.	Cyphastrea	Cyphastrea	sp.	massive	Indian	High	3	75% partially bleached	Hussain & Ingole 2020
Montastraea	Montastraea	sp.	Montastraea	Montastraea	sp.	massive	Indian	Low	1	30% bleached or partially bleached	Hussain & Ingole 2020
Leptastrea	Leptastrea	sp.	Leptastrea	Leptastrea	sp.	encrusting	Indian	Moderate	2	40% partially bleached	Hussain & Ingole 2020
Siderastrea	Siderastrea	sp.	Siderastrea	Siderastrea	sp.	massive	Indian	Moderate	2	40% partially bleached	Hussain & Ingole 2020
Goniopora	Goniopora	sp.	Goniopora	Goniopora	sp.	massive	Indian	None	0	0% bleached or partially bleached	Hussain & Ingole 2020
Coscinaria	Coscinaria	sp.	Coscinaria	Coscinaria	sp.	encrusting / plating	Indian	High	3	65% bleached or partially bleached	Hussain & Ingole 2020
Pseudosiderastrea	Pseudosiderastrea	sp.	Pseudosiderastrea	Pseudosiderastrea	sp.	massive	Indian	Low	1	15% bleached or partially bleached	Hussain & Ingole 2020
Favites	Favites	sp.	Favites	Favites	sp.	massive	Indian	Low	1	30% bleached or partially bleached	Hussain & Ingole 2020
Plesiastrea	Plesiastrea	sp.	Plesiastrea	Plesiastrea	sp.	encrusting	Indian	Low	1	15% bleached or partially bleached	Hussain & Ingole 2020
Favia	Favia	sp.	Favia	Favia	sp.	massive	Indian	Low	1	10% bleached or partially bleached	Hussain & Ingole 2020
Turbinaria	Turbinaria	sp.	Turbinaria	Turbinaria	sp.	plating	Indian	None	0	0% bleached or partially bleached	Hussain & Ingole 2020
Goniastrea	Goniastrea	sp.	Goniastrea	Goniastrea	sp.	massive	Indian	Low	1	35% bleached or partially bleached	Hussain & Ingole 2020
Porites	Porites	sp.	Porites	Porites	sp.	branching / massive	Indian	Severe	4	95% bleached or partially bleached	Hussain & Ingole 2020
Cyphastrea	Cyphastrea	sp.	Cyphastrea	Cyphastrea	sp.	massive	Indian	Severe	4	90% bleached or partially bleached	Hussain & Ingole 2020
Montastraea	Montastraea	sp.	Montastraea	Montastraea	sp.	massive	Indian	Severe	4	100% bleached or partially bleached	Hussain & Ingole 2020
Siderastrea	Siderastrea	sp.	Siderastrea	Siderastrea	sp.	massive	Indian	Low	1	15% bleached or partially bleached	Hussain & Ingole 2020
Goniopora	Goniopora	sp.	Goniopora	Goniopora	sp.	massive	Indian	Low	1	15% bleached or partially bleached	Hussain & Ingole 2020
Coscinaraea	Coscinaraea	sp.	Coscinaria	Coscinaria	sp.	encrusting / plating	Indian	High	3	75% bleached or partially bleached	Hussain & Ingole 2020
Pseudosiderastrea	Pseudosiderastrea	sp.	Pseudosiderastrea	Pseudosiderastrea	sp.	massive	Indian	Low	1	25% bleached or partially bleached	Hussain & Ingole 2020
Favites	Favites	sp.	Favites	Favites	sp.	massive	Indian	Low	1	35% bleached or partially bleached	Hussain & Ingole 2020
Plesiastrea	Plesiastrea	sp.	Plesiastrea	Plesiastrea	sp.	encrusting	Indian	Low	1	30% bleached or partially bleached	Hussain & Ingole 2020
Favia	Favia	sp.	Favia	Favia	sp.	massive	Indian	Low	1	15% bleached or partially bleached	Hussain & Ingole 2020
Turbinaria	Turbinaria	sp.	Turbinaria	Turbinaria	sp.	plating	Indian	Low	1	10% bleached or partially bleached	Hussain & Ingole 2020
Goniastrea	Goniastrea	sp.	Goniastrea	Goniastrea	sp.	massive	Indian	Moderate	2	45% bleached or partially bleached	Hussain & Ingole 2020
Pocillopora elegans	Pocillopora	elegans	Pocillopora elegans	Pocillopora	elegans	branching	Pacific	Low	1	31.5% bleached	Jiménez et al. 2001
Pocillopora damicornis	Pocillopora	damicornis	Pocillopora damicornis	Pocillopora	damicornis	branching	Pacific	Low	1	35% bleached	Jiménez et al. 2001
Pocillopora grandis	Pocillopora	grandis	Pocillopora eydouxi	Pocillopora	eydouxi	branching	Pacific	Low	1	25.2% bleached	Jiménez et al. 2001
Pocillopora meandrina	Pocillopora	meandrina	Pocillopora meandrina	Pocillopora	meandrina	branching	Pacific	Moderate	2	47.9% bleached	Jiménez et al. 2001
Pavona clavus	Pavona	clavus	Pavona clavus	Pavona	clavus	branching	Pacific	Low	1	37.4% bleached	Jiménez et al. 2001
Pavona gigantea	Pavona	gigantea	Pavona gigantea	Pavona	gigantea	massive	Pacific	Low	1	33.7% bleached	Jiménez et al. 2001
Pavona varians	Pavona	varians	Pavona varians	Pavona	varians	encrusting	Pacific	Moderate	2	58.6% bleached	Jiménez et al. 2001
Psammocora	Psammocora	spp.	Psammocora spp.	Psammocora	spp.	encrusting	Pacific	Low	1	36.3% bleached	Jiménez et al. 2001
Porites lobata	Porites	lobata	Porites lobata	Porites	lobata	massive	Pacific	Moderate	2	50% bleached	Jiménez et al. 2001
Porites panamensis	Porites	panamensis	Porites panamensis	Porites	panamensis	columnar	Pacific	Moderate	2	40.1% bleached	Jiménez et al. 2001
Gardineroseris planulata	Gardineroseris	planulata	Gardineroseris planulata	Gardineroseris	planulata	massive	Pacific	None	0	0% bleached	Jiménez et al. 2001
Cycloseris curvata	Cycloseris	curvata	Fungia curvata	Fungia	curvata	free-living	Pacific	Moderate	2	43.6% bleached	Jiménez et al. 2001
Pocillopora elegans	Pocillopora	elegans	Pocillopora elegans	Pocillopora	elegans	branching	Pacific	Low	1	13% bleached	Jiménez et al. 2001
Pocillopora damicornis	Pocillopora	damicornis	Pocillopora damicornis	Pocillopora	damicornis	branching	Pacific	Low	1	27.2% bleached	Jiménez et al. 2001
Pocillopora grandis	Pocillopora	grandis	Pocillopora eydouxi	Pocillopora	eydouxi	branching	Pacific	Low	1	20.7% bleached	Jiménez et al. 2001
Pocillopora inflata	Pocillopora	inflata	Pocillopora inflata	Pocillopora	inflata	branching	Pacific	High	3	75% bleached	Jiménez et al. 2001
Pavona clavus	Pavona	clavus	Pavona clavus	Pavona	clavus	branching	Pacific	Low	1	11.6% bleached	Jiménez et al. 2001
Pavona gigantea	Pavona	gigantea	Pavona gigantea	Pavona	gigantea	massive	Pacific	Low	1	13% bleached	Jiménez et al. 2001
Pavona varians	Pavona	varians	Pavona varians	Pavona	varians	encrusting	Pacific	None	0	0% bleached	Jiménez et al. 2001
Psammocora	Psammocora	spp.	Psammocora spp.	Psammocora	spp.	encrusting	Pacific	Low	1	19.6% bleached	Jiménez et al. 2001
Porites lobata	Porites	lobata	Porites lobata	Porites	lobata	massive	Pacific	Low	1	23.8% bleached	Jiménez et al. 2001
Porites panamensis	Porites	panamensis	Porites panamensis	Porites	panamensis	columnar	Pacific	Low	1	12.7% bleached	Jiménez et al. 2001
Gardineroseris planulata	Gardineroseris	planulata	Gardineroseris planulata	Gardineroseris	planulata	massive	Pacific	Low	1	3.3% bleached	Jiménez et al. 2001
Pocillopora elegans	Pocillopora	elegans	Pocillopora elegans	Pocillopora	elegans	branching	Pacific	High	3	62.8% bleached	Jiménez et al. 2001
Pocillopora damicornis	Pocillopora	damicornis	Pocillopora damicornis	Pocillopora	damicornis	branching	Pacific	High	3	61.4% bleached	Jiménez et al. 2001
Pavona clavus	Pavona	clavus	Pavona clavus	Pavona	clavus	branching	Pacific	Low	1	25% bleached	Jiménez et al. 2001
Psammocora	Psammocora	spp.	Psammocora spp.	Psammocora	spp.	encrusting	Pacific	High	3	75.8% bleached	Jiménez et al. 2001
Porites lobata	Porites	lobata	Porites lobata	Porites	lobata	massive	Pacific	Low	1	31.4% bleached	Jiménez et al. 2001
Orbicella franksi	Orbicella	franksi	Orbicella franksi	Orbicella	franksi	massive	Atlantic	High	3	77.86% bleached	Johnston et al. 2019
Pseudodiploria strigosa	Pseudodiploria	strigosa	Pseudodiploria strigosa	Pseudodiploria	strigosa	massive / encrusting	Atlantic	Moderate	2	56.97% bleached	Johnston et al. 2019
Colpophyllia natans	Colpophyllia	natans	Colpophyllia natans	Colpophyllia	natans	massive / encrusting	Atlantic	High	3	76% bleached	Johnston et al. 2019
Porites astreoides	Porites	astreoides	Porites astreoides	Porites	astreoides	massive / encrusting	Atlantic	Low	1	10.94% bleached	Johnston et al. 2019
Montastraea cavernosa	Montastraea	cavernosa	Montastraea cavernosa	Montastraea	cavernosa	massive	Atlantic	Severe	4	89.58% bleached	Johnston et al. 2019
Orbicella faveolata	Orbicella	faveolata	Orbicella faveolata	Orbicella	faveolata	massive / encrusting	Atlantic	Severe	4	92.68% bleached	Johnston et al. 2019
Agaricia agaricites	Agaricia	agaricites	Agaricia agaricites	Agaricia	agaricites	plating	Atlantic	Severe	4	91.84% bleached	Johnston et al. 2019
Agaricia fragilis	Agaricia	fragilis	Agaricia fragilis	Agaricia	fragilis	plating	Atlantic	None	0	0% bleached	Johnston et al. 2019
Stephanocoenia intersepta	Stephanocoenia	intersepta	Stephanocoenia intersepta	Stephanocoenia	intersepta	massive / encrusting	Atlantic	High	3	60% bleached	Johnston et al. 2019
Mussa angulosa	Mussa	angulosa	Mussa angulosa	Mussa	angulosa	massive	Atlantic	Severe	4	87.5% bleached	Johnston et al. 2019
Porites furcata	Porites	furcata	Porites furcata	Porites	furcata	columnar	Atlantic	None	0	0% bleached	Johnston et al. 2019
Siderastrea siderea	Siderastrea	siderea	Siderastrea siderea	Siderastrea	siderea	massive	Atlantic	Severe	4	100% bleached	Johnston et al. 2019
Siderastrea radians	Siderastrea	radians	Siderastrea radians	Siderastrea	radians	massive / encrusting	Atlantic	Severe	4	100% bleached	Johnston et al. 2019
Madracis decactis	Madracis	decactis	Madracis decactis	Madracis	decactis	columnar	Atlantic	Low	1	12.5% bleached	Johnston et al. 2019
Orbicella annularis	Orbicella	annularis	Orbicella annularis	Orbicella	annularis	massive	Atlantic	Low	1	25% bleached	Johnston et al. 2019
Scolymia cubensis	Scolymia	cubensis	Scolymia cubensis	Scolymia	cubensis	free-living	Atlantic	Low	1	33.33% bleached	Johnston et al. 2019
Madracis auretenra	Madracis	auretenra	Madracis auretenra	Madracis	auretenra	columnar	Atlantic	None	0	0% bleached	Johnston et al. 2019
Orbicella	Orbicella	spp.	Orbicella spp.	Orbicella	spp.	massive	Atlantic	None	0	0% bleached	Johnston et al. 2019
Orbicella franksi	Orbicella	franksi	Orbicella franksi	Orbicella	franksi	massive	Atlantic	Low	1	28.41% bleached	Johnston et al. 2019
Pseudodiploria strigosa	Pseudodiploria	strigosa	Pseudodiploria strigosa	Pseudodiploria	strigosa	massive / encrusting	Atlantic	Low	1	12.54% bleached	Johnston et al. 2019
Colpophyllia natans	Colpophyllia	natans	Colpophyllia natans	Colpophyllia	natans	massive / encrusting	Atlantic	Moderate	2	51.28% bleached	Johnston et al. 2019
Porites astreoides	Porites	astreoides	Porites astreoides	Porites	astreoides	massive / encrusting	Atlantic	Low	1	1.72% bleached	Johnston et al. 2019
Montastraea cavernosa	Montastraea	cavernosa	Montastraea cavernosa	Montastraea	cavernosa	massive	Atlantic	Severe	4	97.35% bleached	Johnston et al. 2019
Orbicella faveolata	Orbicella	faveolata	Orbicella faveolata	Orbicella	faveolata	massive / encrusting	Atlantic	Moderate	2	40.35% bleached	Johnston et al. 2019
Agaricia agaricites	Agaricia	agaricites	Agaricia agaricites	Agaricia	agaricites	plating	Atlantic	High	3	60.32% bleached	Johnston et al. 2019
Agaricia fragilis	Agaricia	fragilis	Agaricia fragilis	Agaricia	fragilis	plating	Atlantic	None	0	0% bleached	Johnston et al. 2019
Stephanocoenia intersepta	Stephanocoenia	intersepta	Stephanocoenia intersepta	Stephanocoenia	intersepta	massive / encrusting	Atlantic	Severe	4	94.59% bleached	Johnston et al. 2019
Mussa angulosa	Mussa	angulosa	Mussa angulosa	Mussa	angulosa	massive	Atlantic	High	3	75% bleached	Johnston et al. 2019
Porites furcata	Porites	furcata	Porites furcata	Porites	furcata	columnar	Atlantic	None	0	0% bleached	Johnston et al. 2019
Siderastrea siderea	Siderastrea	siderea	Siderastrea siderea	Siderastrea	siderea	massive	Atlantic	High	3	75% bleached	Johnston et al. 2019
Siderastrea radians	Siderastrea	radians	Siderastrea radians	Siderastrea	radians	massive / encrusting	Atlantic	None	0	0% bleached	Johnston et al. 2019
Madracis decactis	Madracis	decactis	Madracis decactis	Madracis	decactis	columnar	Atlantic	None	0	0% bleached	Johnston et al. 2019
Orbicella annularis	Orbicella	annularis	Orbicella annularis	Orbicella	annularis	massive	Atlantic	Low	1	22.39% bleached	Johnston et al. 2019
Scolymia cubensis	Scolymia	cubensis	Scolymia cubensis	Scolymia	cubensis	free-living	Atlantic	None	0	0% bleached	Johnston et al. 2019
Madracis auretenra	Madracis	auretenra	Madracis auretenra	Madracis	auretenra	columnar	Atlantic	None	0	0% bleached	Johnston et al. 2019
Orbicella	Orbicella	spp.	Orbicella spp.	Orbicella	spp.	massive	Atlantic	None	0	0% bleached	Johnston et al. 2019
Orbicella franksi	Orbicella	franksi	Orbicella franksi	Orbicella	franksi	massive	Atlantic	Low	1	28.41% bleached	Johnston et al. 2019
Pseudodiploria strigosa	Pseudodiploria	strigosa	Pseudodiploria strigosa	Pseudodiploria	strigosa	massive / encrusting	Atlantic	Low	1	12.54% bleached	Johnston et al. 2019
Colpophyllia natans	Colpophyllia	natans	Colpophyllia natans	Colpophyllia	natans	massive / encrusting	Atlantic	Moderate	2	51.28% bleached	Johnston et al. 2019
Porites astreoides	Porites	astreoides	Porites astreoides	Porites	astreoides	massive / encrusting	Atlantic	Low	1	1.72% bleached	Johnston et al. 2019
Montastraea cavernosa	Montastraea	cavernosa	Montastraea cavernosa	Montastraea	cavernosa	massive	Atlantic	Severe	4	97.35% bleached	Johnston et al. 2019
Orbicella faveolata	Orbicella	faveolata	Orbicella faveolata	Orbicella	faveolata	massive / encrusting	Atlantic	Moderate	2	40.35% bleached	Johnston et al. 2019
Agaricia agaricites	Agaricia	agaricites	Agaricia agaricites	Agaricia	agaricites	plating	Atlantic	High	3	60.32% bleached	Johnston et al. 2019
Agaricia fragilis	Agaricia	fragilis	Agaricia fragilis	Agaricia	fragilis	plating	Atlantic	None	0	0% bleached	Johnston et al. 2019
Stephanocoenia intersepta	Stephanocoenia	intersepta	Stephanocoenia intersepta	Stephanocoenia	intersepta	massive / encrusting	Atlantic	Severe	4	94.59% bleached	Johnston et al. 2019
Mussa angulosa	Mussa	angulosa	Mussa angulosa	Mussa	angulosa	massive	Atlantic	High	3	75% bleached	Johnston et al. 2019
Porites furcata	Porites	furcata	Porites furcata	Porites	furcata	columnar	Atlantic	None	0	0% bleached	Johnston et al. 2019
Siderastrea siderea	Siderastrea	siderea	Siderastrea siderea	Siderastrea	siderea	massive	Atlantic	High	3	75% bleached	Johnston et al. 2019
Siderastrea radians	Siderastrea	radians	Siderastrea radians	Siderastrea	radians	massive / encrusting	Atlantic	None	0	0% bleached	Johnston et al. 2019
Madracis decactis	Madracis	decactis	Madracis decactis	Madracis	decactis	columnar	Atlantic	None	0	0% bleached	Johnston et al. 2019
Orbicella annularis	Orbicella	annularis	Orbicella annularis	Orbicella	annularis	massive	Atlantic	Low	1	22.39% bleached	Johnston et al. 2019
Scolymia cubensis	Scolymia	cubensis	Scolymia cubensis	Scolymia	cubensis	free-living	Atlantic	None	0	0% bleached	Johnston et al. 2019
Madracis auretenra	Madracis	auretenra	Madracis auretenra	Madracis	auretenra	columnar	Atlantic	None	0	0% bleached	Johnston et al. 2019
Orbicella	Orbicella	spp.	Orbicella spp.	Orbicella	spp.	massive	Atlantic	None	0	0% bleached	Johnston et al. 2019
Orbicella franksi	Orbicella	franksi	Orbicella franksi	Orbicella	franksi	massive	Atlantic	Low	1	1.22% bleached	Johnston et al. 2019
Pseudodiploria strigosa	Pseudodiploria	strigosa	Pseudodiploria strigosa	Pseudodiploria	strigosa	massive / encrusting	Atlantic	None	0	0% bleached	Johnston et al. 2019
Colpophyllia natans	Colpophyllia	natans	Colpophyllia natans	Colpophyllia	natans	massive / encrusting	Atlantic	Low	1	25% bleached	Johnston et al. 2019
Porites astreoides	Porites	astreoides	Porites astreoides	Porites	astreoides	massive / encrusting	Atlantic	Low	1	3.57% bleached	Johnston et al. 2019
Montastraea cavernosa	Montastraea	cavernosa	Montastraea cavernosa	Montastraea	cavernosa	massive	Atlantic	Moderate	2	59.15% bleached	Johnston et al. 2019
Orbicella faveolata	Orbicella	faveolata	Orbicella faveolata	Orbicella	faveolata	massive / encrusting	Atlantic	None	0	0% bleached	Johnston et al. 2019
Agaricia agaricites	Agaricia	agaricites	Agaricia agaricites	Agaricia	agaricites	plating	Atlantic	Low	1	12.5% bleached	Johnston et al. 2019
Agaricia fragilis	Agaricia	fragilis	Agaricia fragilis	Agaricia	fragilis	plating	Atlantic	None	0	0% bleached	Johnston et al. 2019
Stephanocoenia intersepta	Stephanocoenia	intersepta	Stephanocoenia intersepta	Stephanocoenia	intersepta	massive / encrusting	Atlantic	Low	1	35.14% bleached	Johnston et al. 2019
Mussa angulosa	Mussa	angulosa	Mussa angulosa	Mussa	angulosa	massive	Atlantic	None	0	0% bleached	Johnston et al. 2019
Porites furcata	Porites	furcata	Porites furcata	Porites	furcata	columnar	Atlantic	Severe	4	100% bleached	Johnston et al. 2019
Siderastrea siderea	Siderastrea	siderea	Siderastrea siderea	Siderastrea	siderea	massive	Atlantic	None	0	0% bleached	Johnston et al. 2019
Siderastrea radians	Siderastrea	radians	Siderastrea radians	Siderastrea	radians	massive / encrusting	Atlantic	None	0	0% bleached	Johnston et al. 2019
Madracis decactis	Madracis	decactis	Madracis decactis	Madracis	decactis	columnar	Atlantic	None	0	0% bleached	Johnston et al. 2019
Orbicella annularis	Orbicella	annularis	Orbicella annularis	Orbicella	annularis	massive	Atlantic	None	0	0% bleached	Johnston et al. 2019
Scolymia cubensis	Scolymia	cubensis	Scolymia cubensis	Scolymia	cubensis	free-living	Atlantic	None	0	0% bleached	Johnston et al. 2019
Madracis auretenra	Madracis	auretenra	Madracis auretenra	Madracis	auretenra	columnar	Atlantic	None	0	0% bleached	Johnston et al. 2019
Orbicella	Orbicella	spp.	Orbicella spp.	Orbicella	spp.	massive	Atlantic	None	0	0% bleached	Johnston et al. 2019
Porites evermanni	Porites	evermanni	Porites evermanni	Porites	evermanni	massive / columnar	Pacific	Low	1	n/a (qualitative)	Jokiel & Brown 2004
Cyphastrea ocellina	Cyphastrea	ocellina	Cyphastrea ocellina	Cyphastrea	ocellina	massive / encrusting	Pacific	Low	1	n/a (qualitative)	Jokiel & Brown 2004
Lobactis scutaria	Lobactis	scutaria	Fungia scutaria	Fungia	scutaria	free-living	Pacific	Low	1	n/a (qualitative)	Jokiel & Brown 2004
Porites brighami	Porites	brighami	Porites brighami	Porites	brighami	encrusting	Pacific	Low	1	n/a (qualitative)	Jokiel & Brown 2004
Porites compressa	Porites	compressa	Porites compressa	Porites	compressa	massive	Pacific	Moderate	2	n/a (qualitative)	Jokiel & Brown 2004
Porites lobata	Porites	lobata	Porites lobata	Porites	lobata	massive	Pacific	Moderate	2	n/a (qualitative)	Jokiel & Brown 2004
Montipora patula	Montipora	patula	Montipora patula	Montipora	patula	encrusting	Pacific	Moderate	2	n/a (qualitative)	Jokiel & Brown 2004
Montipora capitata	Montipora	capitata	Montipora capitata	Montipora	capitata	branching / encrusting	Pacific	Moderate	2	n/a (qualitative)	Jokiel & Brown 2004
Montipora flabellata	Montipora	ﬂabellata	Montipora ﬂabellata	Montipora	ﬂabellata	encrusting	Pacific	High	3	n/a (qualitative)	Jokiel & Brown 2004
Pocillopora meandrina	Pocillopora	meandrina	Pocillopora meandrina	Pocillopora	meandrina	branching	Pacific	High	3	n/a (qualitative)	Jokiel & Brown 2004
Pocillopora damicornis	Pocillopora	damicornis	Pocillopora damicornis	Pocillopora	damicornis	branching	Pacific	High	3	n/a (qualitative)	Jokiel & Brown 2004
Montipora dilatata	Montipora	dilatata	Montipora dilatata	Montipora	dilatata	encrusting	Pacific	High	3	n/a (qualitative)	Jokiel & Brown 2004
Acropora latistella	Acropora	latistella	Acropora latistella	Acropora	latistella	table / branching	Pacific	Moderate	2	~50% total and partial bleaching combined	Jones 2008
Acropora subulata	Acropora	subulata	Acropora subulata	Acropora	subulata	table / branching	Pacific	High	3	~65% total and partial bleaching combined	Jones 2008
Turbinaria mesenterina	Turbinaria	mesenterina	Turbinaria mesenterina	Turbinaria	mesenterina	plating	Pacific	Severe	4	~80% total and partial bleaching combined	Jones 2008
Acropora latistella	Acropora	latistella	Acropora latistella	Acropora	latistella	table / branching	Pacific	Low	1	~30% total and partial bleaching combined	Jones 2008
Acropora subulata	Acropora	subulata	Acropora subulata	Acropora	subulata	table / branching	Pacific	Low	1	~30% total and partial bleaching combined	Jones 2008
Turbinaria mesenterina	Turbinaria	mesenterina	Turbinaria mesenterina	Turbinaria	mesenterina	plating	Pacific	Low	1	~5% total and partial bleaching combined	Jones 2008
Acropora latistella	Acropora	latistella	Acropora latistella	Acropora	latistella	table / branching	Pacific	Low	1	~5% total and partial bleaching combined	Jones 2008
Acropora subulata	Acropora	subulata	Acropora subulata	Acropora	subulata	table / branching	Pacific	Low	1	~25% total and partial bleaching combined	Jones 2008
Turbinaria mesenterina	Turbinaria	mesenterina	Turbinaria mesenterina	Turbinaria	mesenterina	plating	Pacific	Low	1	<5% total and partial bleaching combined	Jones 2008
Porites	Porites	spp.	Porites (massive)	Porites	spp.	massive	Pacific	High	3	33.3% bleached; 42.9% partly bleached	Kayanne et al. 2002
Porites	Porites	spp.	Porites (branching)	Porites	spp.	branching	Pacific	Moderate	2	16.7% bleached; 16.2% partly bleached	Kayanne et al. 2002
Montipora	Montipora	spp.	Montipora (branching)	Montipora	spp.	branching	Pacific	Moderate	2	15.3% bleached; 15.0% partly bleached	Kayanne et al. 2002
Acropora	Acropora	spp.	Acropora (branching)	Acropora	spp.	branching	Pacific	Low	1	4.9% bleached; 6.4% partly bleached	Kayanne et al. 2002
Pavona	Pavona	spp.	Pavona	Pavona	spp.	encrusting / plating	Pacific	Low	1	6.0% bleached; 3.1% partly bleached	Kayanne et al. 2002
Porites	Porites	sp.	Porites	Porites	sp.	massive	Pacific	Moderate	2	50 Bleaching Index	Kim et al. 2019
Pocillopora	Pocillopora	sp.	Pocillopora	Pocillopora	sp.	branching	Pacific	Moderate	2	~30 Bleaching Index	Kim et al. 2019
Acropora	Acropora	sp.	Acropora	Acropora	sp.	branching	Pacific	Low	1	~10 Bleaching Index	Kim et al. 2019
Turbinaria	Turbinaria	sp.	Turbinaria	Turbinaria	sp.	plating	Pacific	None	0	0 Bleaching Index	Kim et al. 2019
Acropora	Acropora	sp.	Acropora	Acropora	sp.	branching	Pacific	None	0	0 Bleaching Index	Kim et al. 2019
Porites astreoides	Porites	astreoides	Porites astreoides	Porites	astreoides	massive	Atlantic	High	3	0.91 Cross-Correlation Coefficient	Knipp et al. 2020
Agaricia	Agaricia	sp.	Agaricia sp.	Agaricia	sp.	plating	Atlantic	High	3	0.89 Cross-Correlation Coefficient	Knipp et al. 2020
Siderastrea	Siderastrea	sp.	Siderastrea sp.	Siderastrea	sp.	massive	Atlantic	High	3	0.69 Cross-Correlation Coefficient	Knipp et al. 2020
Meandrina meandrites	Meandrina	meandrites	Meandrina meandrites	Meandrina	meandrites	massive	Atlantic	High	3	0.68 Cross-Correlation Coefficient	Knipp et al. 2020
Siderastrea siderea	Siderastrea	siderea	Siderastrea siderea	Siderastrea	siderea	massive	Atlantic	Moderate	2	0.64 Cross-Correlation Coefficient	Knipp et al. 2020
Favia fragum	Favia	fragum	Favia fragum	Favia	fragum	massive	Atlantic	Moderate	2	0.55 Cross-Correlation Coefficient	Knipp et al. 2020
Siderastrea radians	Siderastrea	radians	Siderastrea radians	Siderastrea	radians	massive	Atlantic	Moderate	2	0.55 Cross-Correlation Coefficient	Knipp et al. 2020
Diploria labyrinthiformis	Diploria	labyrinthiformis	Diploria labyrinthiformis	Diploria	labyrinthiformis	massive	Atlantic	Moderate	2	0.48 Cross-Correlation Coefficient	Knipp et al. 2020
Eusmilia fastigiata	Eusmilia	fastigiata	Eusmilia fastigiata	Eusmilia	fastigiata	massive	Atlantic	Moderate	2	0.45 Cross-Correlation Coefficient	Knipp et al. 2020
Agaricia agaricites	Agaricia	agaricites	Agaricia agaricites	Agaricia	agaricites	plating	Atlantic	Moderate	2	0.37 Cross-Correlation Coefficient	Knipp et al. 2020
Pseudodiploria strigosa	Pseudodiploria	strigosa	Diploria strigosa	Diploria	strigosa	massive	Atlantic	Moderate	2	0.37 Cross-Correlation Coefficient	Knipp et al. 2020
Dichocoenia stokesii	Dichocoenia	stokesii	Dichocoenia stokesii	Dichocoenia	stokesi	massive	Atlantic	Moderate	2	0.34 Cross-Correlation Coefficient	Knipp et al. 2020
Colpophyllia natans	Colpophyllia	natans	Colpophyllia natans	Colpophyllia	natans	massive	Atlantic	Low	1	0.31 Cross-Correlation Coefficient	Knipp et al. 2020
Orbicella annularis	Orbicella	annularis	Orbicella annularis	Orbicella	annularis	massive	Atlantic	Low	1	0.28 Cross-Correlation Coefficient	Knipp et al. 2020
Montastraea cavernosa	Montastraea	cavernosa	Montastrea cavernosa	Montastrea	cavernosa	massive	Atlantic	Low	1	0.24 Cross-Correlation Coefficient	Knipp et al. 2020
Stephanocoenia intersepta	Stephanocoenia	intersepta	Stephanocoenia intersepta	Stephanocoenia	intersepta	massive	Atlantic	Low	1	0.22 Cross-Correlation Coefficient	Knipp et al. 2020
Agaricia tenuifolia	Agaricia	tenuifolia	Agaricia tenuifolia	Agaricia	tenuifolia	plating	Atlantic	Low	1	0.2 Cross-Correlation Coefficient	Knipp et al. 2020
Madracis myriaster	Madracis	myriaster	Madracis mirabilis	Madracis	mirabilis	massive	Atlantic	Low	1	0.2 Cross-Correlation Coefficient	Knipp et al. 2020
Agaricia humilis	Agaricia	humilis	Agaricia humilis	Agaricia	humilis	plating	Atlantic	Low	1	0.17 Cross-Correlation Coefficient	Knipp et al. 2020
Porites	Porites	sp.	Porites sp.	Porites	sp.	massive	Atlantic	Low	1	0.14 Cross-Correlation Coefficient	Knipp et al. 2020
Isophyllia rigida	Isophyllia	rigida	Isophyllastrea rigida	Isophyllastrea	rigida	massive	Atlantic	Low	1	0.1 Cross-Correlation Coefficient	Knipp et al. 2020
Orbicella franksi	Orbicella	franksi	Montastrea franksi	Montastrea	franksi	massive	Atlantic	Low	1	0.1 Cross-Correlation Coefficient	Knipp et al. 2020
Mycetophyllia lamarckana	Mycetophyllia	lamarckana	Mycetophyllia lamarckiana	Mycetophyllia	lamarckiana	massive	Atlantic	Low	1	0.1 Cross-Correlation Coefficient	Knipp et al. 2020
Palythoa caribaeorum	Palythoa	caribaeorum	Palythoa caribaeorum	Palythoa	caribaeorum	massive	Atlantic	Low	1	0.1 Cross-Correlation Coefficient	Knipp et al. 2020
Stephanocoenia intersepta	Stephanocoenia	intersepta	Stephanocoenia michelini	Stephanocoenia	michelini	massive	Atlantic	Low	1	0.1 Cross-Correlation Coefficient	Knipp et al. 2020
Colpophyllia natans	Colpophyllia	natans	Colpophyllia natans	Colpophyllia	natans	massive	Atlantic	High	3	100% bleached	Lang et al. 1992
Diploria labyrinthiformis	Diploria	labyrinthiformis	Diploria labyrinthiformis	Diploria	labyrinthiformis	massive	Atlantic	Moderate	2	48% bleached	Lang et al. 1992
Helioseris cucullata	Helioseris	cucullata	Leptoseris cucullata	Leptoseris	cucullata	plating	Atlantic	Moderate	2	33% bleached	Lang et al. 1992
Orbicella annularis	Orbicella	annularis	Montastrea annularis	Montastrea	annularis	massive	Atlantic	Low	1	6% bleached	Lang et al. 1992
Orbicella annularis	Orbicella	annularis	Montastrea annularis	Montastrea	annularis	massive	Atlantic	Low	1	2% bleached	Lang et al. 1992
Helioseris cucullata	Helioseris	cucullata	Leptoseris cucullata	Leptoseris	cucullata	plating	Atlantic	High	3	100% bleached	Lang et al. 1992
Agaricia agaricites	Agaricia	agaricites	Agaricia agaricites	Agaricia	agaricites	plating	Atlantic	Moderate	2	32% bleached	Lang et al. 1992
Orbicella annularis	Orbicella	annularis	Montastrea annularis	Montastrea	annularis	massive	Atlantic	Low	1	4% bleached	Lang et al. 1992
Orbicella annularis	Orbicella	annularis	Montastrea annularis	Montastrea	annularis	massive	Atlantic	Low	1	12% bleached	Lang et al. 1992
Colpophyllia natans	Colpophyllia	natans	Colpophyllia natans	Colpophyllia	natans	massive	Atlantic	Low	1	1% bleached	Lang et al. 1992
Agaricia agaricites	Agaricia	agaricites	Agaricia agaricites	Agaricia	agaricites	plating	Atlantic	Moderate	2	33% bleached	Lang et al. 1992
Porites astreoides	Porites	astreoides	Porites astreoides	Porites	astreoides	massive	Atlantic	Low	1	8% bleached	Lang et al. 1992
Agaricia tenuifolia	Agaricia	tenuifolia	Agaricia tenuifolia	Agaricia	tenuifolia	plating	Atlantic	Low	1	5% bleached	Lang et al. 1992
Colpophyllia natans	Colpophyllia	natans	Colpophyllia natans	Colpophyllia	natans	massive	Atlantic	Low	1	4% bleached	Lang et al. 1992
Orbicella annularis	Orbicella	annularis	Montastrea annularis	Montastrea	annularis	massive	Atlantic	Low	1	2% bleached	Lang et al. 1992
Pocillopora verrucosa	Pocillopora	verrucosa	Pocillopora verrucosa	Pocillopora	verrucosa	branching	Pacific	Moderate	2	31.8 ± 34.8% bleached	Lenihan et al. 2008
Acropora elseyi	Acropora	elseyi	Acropora elseyi	Acropora	elseyi	branching	Pacific	Moderate	2	39.7 ± 43.6% bleached	Lenihan et al. 2008
Porites rus	Porites	rus	Porites rus	Porites	rus	branching / encrusting	Pacific	None	0	0% bleached	Lenihan et al. 2008
Montipora	Montipora	sp.	Montipora	Montipora	sp.	encrusting / plating	Pacific	High	3	50% bleached	Li et al. 2012
Goniastrea	Goniastrea	sp.	Goniastrea	Goniastrea	sp.	massive	Pacific	Moderate	2	~28% bleached	Li et al. 2012
Platygyra	Platygyra	sp.	Platygyra	Platygyra	sp.	massive	Pacific	Moderate	2	~20% bleached	Li et al. 2012
Acropora	Acropora	sp.	Acropora (branching)	Acropora	sp.	branching	Pacific	Moderate	2	~20% bleached	Li et al. 2012
Leptoria	Leptoria	sp.	Leptoria	Leptoria	sp.	massive	Pacific	Moderate	2	~20% bleached	Li et al. 2012
Favia	Favia	sp.	Favia	Favia	sp.	massive	Pacific	Moderate	2	~20% bleached	Li et al. 2012
Acropora	Acropora	sp.	Acropora (table)	Acropora	sp.	table / branching	Pacific	Low	1	~15% bleached	Li et al. 2012
Porites	Porites	sp.	Porites	Porites	sp.	massive	Pacific	Low	1	~15% bleached	Li et al. 2012
Favites	Favites	sp.	Favites	Favites	sp.	massive	Pacific	Low	1	~15% bleached	Li et al. 2012
Galaxea	Galaxea	sp.	Galaxea	Galaxea	sp.	massive	Pacific	Low	1	10% bleached	Li et al. 2012
Pocillopora	Pocillopora	sp.	Pocillopora	Pocillopora	sp.	branching	Pacific	Low	1	~8% bleached	Li et al. 2012
Acropora aspera	Acropora	aspera	Acropora aspera	Acopora	aspera	branching	Pacific	High	3	n/a (qualitative)	Loya et al. 2001
Acropora digitifera	Acropora	digitifera	Acropora digitifera	Acopora	digitifera	branching	Pacific	High	3	n/a (qualitative)	Loya et al. 2001
Acropora gemmifera	Acropora	gemmifera	Acropora gemmifera	Acopora	gemmifera	branching	Pacific	High	3	n/a (qualitative)	Loya et al. 2001
Montipora digitata	Montipora	digitata	Montipora digitata	Montipora	digitata	branching	Pacific	High	3	n/a (qualitative)	Loya et al. 2001
Stylophora pistillata	Stylophora	pistillata	Stylophora pistillata	Stylophora	pistillata	branching	Pacific	High	3	n/a (qualitative)	Loya et al. 2001
Pocillopora verrucosa	Pocillopora	verrucosa	Pocillopora verrucosa	Pocillopora	verrucosa	branching	Pacific	High	3	n/a (qualitative)	Loya et al. 2001
Pocillopora damicornis	Pocillopora	damicornis	Pocillopora damicornis	Pocillopora	damicornis	branching	Pacific	High	3	n/a (qualitative)	Loya et al. 2001
Seriatopora hystrix	Seriatopora	hystrix	Seriatopora hystrix	Seriatopora	hystrix	branching	Pacific	High	3	n/a (qualitative)	Loya et al. 2001
Seriatopora caliendrum	Seriatopora	caliendrum	Seriatopora caliendrum	Seriatopora	caliendrum	branching	Pacific	High	3	n/a (qualitative)	Loya et al. 2001
Porites sillimaniani	Porites	sillimaniani	Porites sillimaniani	Porites	sillimaniani	branching	Pacific	High	3	n/a (qualitative)	Loya et al. 2001
Porites cylindrica	Porites	cylindrica	Porites cylindrica	Porites	cylindrica	branching	Pacific	High	3	n/a (qualitative)	Loya et al. 2001
Porites horizontalata	Porites	horizontalata	Porites horizontalata	Porites	horizontalata	branching	Pacific	High	3	n/a (qualitative)	Loya et al. 2001
Porites attenuata	Porites	attenuata	Porites attenuata	Porites	attenuata	branching	Pacific	High	3	n/a (qualitative)	Loya et al. 2001
Leptastrea purpurea	Leptastrea	purpurea	Leptastrea purpurea	Leptastrea	purpurea	encrusting	Pacific	Low	1	n/a (qualitative)	Loya et al. 2001
Leptastrea transversa	Leptastrea	transversa	Leptastrea transversa	Leptastrea	transversa	encrusting	Pacific	Low	1	n/a (qualitative)	Loya et al. 2001
Porites lutea	Porites	lutea	Porites lutea	Porites	lutea	massive	Pacific	Low	1	n/a (qualitative)	Loya et al. 2001
Porites lobata	Porites	lobata	Porites lobata	Porites	lobata	massive	Pacific	Low	1	n/a (qualitative)	Loya et al. 2001
Porites rus	Porites	rus	Porites rus	Porites	rus	massive	Pacific	Low	1	n/a (qualitative)	Loya et al. 2001
Coelastrea aspera	Coelastrea	aspera	Goniastrea aspera	Goniastrea	aspera	massive	Pacific	Low	1	n/a (qualitative)	Loya et al. 2001
Goniastrea retiformis	Goniastrea	retiformis	Goniastrea retiformis	Goniastrea	retiformis	massive	Pacific	Low	1	n/a (qualitative)	Loya et al. 2001
Platygyra ryukyuensis	Platygyra	ryukyuensis	Platygyra ryukyuensis	Platygyra	ryukyuensis	massive	Pacific	Low	1	n/a (qualitative)	Loya et al. 2001
Favites chinensis	Favites	chinensis	Favites chinensis	Favites	chinensis	massive	Pacific	Low	1	n/a (qualitative)	Loya et al. 2001
Dipsastraea pallida	Dipsastraea	pallida	Favia pallida	Favia	pallida	massive	Pacific	Low	1	n/a (qualitative)	Loya et al. 2001
Acropora	Acropora	sp.	Acropora (table)	Acropora	sp.	table / branching	Pacific	Severe	4	>15% dead	Marshall & Baird 2000
Pocillopora damicornis	Pocillopora	damicornis	Pocillopora damicornis	Pocillopora	damicornis	branching	Pacific	Severe	4	>15% dead	Marshall & Baird 2000
Stylophora pistillata	Stylophora	pistillata	Stylophora pistillata	Stylophora	pistillata	branching	Pacific	Severe	4	>15% dead	Marshall & Baird 2000
Acropora	Acropora	sp.	Acropora (branching)	Acropora	sp.	branching	Pacific	Severe	4	>15% dead	Marshall & Baird 2000
Seriatopora hystrix	Seriatopora	hystrix	Seriatopora hystrix	Seriatopora	hystrix	branching	Pacific	Severe	4	>15% dead	Marshall & Baird 2000
Pachyseris	Pachyseris	sp.	Pachyseris	Pachyseris	sp.	plating	Pacific	High	3	>50% severely bleached or dead	Marshall & Baird 2000
Montipora	Montipora	sp.	Montipora (plating)	Montipora	sp.	plating	Pacific	High	3	>50% severely bleached or dead	Marshall & Baird 2000
Pectinia	Pectinia	sp.	Pectinia	Pectinia	sp.	branching / plating	Pacific	High	3	>50% severely bleached or dead	Marshall & Baird 2000
Montipora	Montipora	sp.	Montipora (branching)	Montipora	sp.	branching	Pacific	High	3	>50% severely bleached or dead	Marshall & Baird 2000
Merulina	Merulina	sp.	Merulina	Merulina	sp.	plating	Pacific	High	3	>50% severely bleached or dead	Marshall & Baird 2000
Platygyra	Platygyra	sp.	Platygyra	Platygyra	sp.	massive	Pacific	High	3	>50% severely bleached or dead	Marshall & Baird 2000
Hydnophora	Hydnophora	sp.	Hydnophora	Hydnophora	sp.	massive	Pacific	Moderate	2	>50% of colonies affected by bleaching	Marshall & Baird 2000
Montastraea	Montastraea	sp.	Montastrea	Montastrea	sp.	massive	Pacific	Moderate	2	>50% of colonies affected by bleaching	Marshall & Baird 2000
Oxypora	Oxypora	sp.	Oxypora	Oxypora	sp.	plating	Pacific	Moderate	2	>50% of colonies affected by bleaching	Marshall & Baird 2000
Favites	Favites	sp.	Favites	Favites	sp.	massive	Pacific	Moderate	2	>50% of colonies affected by bleaching	Marshall & Baird 2000
Favia	Favia	sp.	Favia	Favia	sp.	massive	Pacific	Moderate	2	>50% of colonies affected by bleaching	Marshall & Baird 2000
Echinopora	Echinopora	sp.	Echinopora	Echinopora	sp.	plating	Pacific	Moderate	2	>50% of colonies affected by bleaching	Marshall & Baird 2000
Goniastrea	Goniastrea	sp.	Goniastrea	Goniastrea	sp.	massive	Pacific	Moderate	2	>50% of colonies affected by bleaching	Marshall & Baird 2000
Porites	Porites	sp.	Porites (massive)	Porites	sp.	massive	Pacific	Moderate	2	>50% of colonies affected by bleaching	Marshall & Baird 2000
Lobophyllia	Lobophyllia	sp.	Lobophyllia	Lobophyllia	sp.	encrusting	Pacific	Moderate	2	>50% of colonies affected by bleaching	Marshall & Baird 2000
Leptoria	Leptoria	sp.	Leptoria	Leptoria	sp.	massive	Pacific	Moderate	2	>50% of colonies affected by bleaching	Marshall & Baird 2000
Fungia	Fungia	sp.	Fungia	Fungia	sp.	free-living	Pacific	Low	1	<50% of colonies affected and <1% dead	Marshall & Baird 2000
Echinophyllia	Echinophyllia	sp.	Echinophyllia	Echinophyllia	sp.	plating	Pacific	Low	1	<50% of colonies affected and <1% dead	Marshall & Baird 2000
Leptastrea	Leptastrea	sp.	Leptastrea	Leptastrea	sp.	encrusting	Pacific	Low	1	<50% of colonies affected and <1% dead	Marshall & Baird 2000
Psammocora	Psammocora	sp.	Psammocora	Psammocora	sp.	encrusting	Pacific	Low	1	<50% of colonies affected and <1% dead	Marshall & Baird 2000
Lobophyllia	Lobophyllia	sp.	Symphyllia	Symphyllia	sp.	encrusting	Pacific	Low	1	<50% of colonies affected and <1% dead	Marshall & Baird 2000
Galaxea	Galaxea	sp.	Galaxea	Galaxea	sp.	massive	Pacific	Low	1	<50% of colonies affected and <1% dead	Marshall & Baird 2000
Goniopora	Goniopora	sp.	Goniopora	Goniopora	sp.	massive	Pacific	Low	1	<50% of colonies affected and <1% dead	Marshall & Baird 2000
Cyphastrea	Cyphastrea	sp.	Cyphastrea	Cyphastrea	sp.	massive	Pacific	Low	1	<50% of colonies affected and <1% dead	Marshall & Baird 2000
Turbinaria	Turbinaria	sp.	Turbinaria	Turbinaria	sp.	plating	Pacific	Low	1	<50% of colonies affected and <1% dead	Marshall & Baird 2000
Acropora	Acropora	sp.	Acropora (corymbose)	Acropora	sp.	corymbose	Pacific	Mixed	n/a	variable	Marshall & Baird 2000
Mycedium	Mycedium	sp.	Mycedium	Mycedium	sp.	plating	Pacific	Mixed	n/a	variable	Marshall & Baird 2000
Pavona	Pavona	sp.	Pavona	Pavona	sp.	massive / encrusting	Pacific	Mixed	n/a	variable	Marshall & Baird 2000
Montipora capitata	Montipora	capitata	Montipora capitata	Montipora	capitata	branching / encrusting	Pacific	High	3	69% bleached	Matsuda et al. 2020
Montipora capitata	Montipora	capitata	Montipora capitata	Montipora	capitata	branching / encrusting	Pacific	Moderate	2	39% bleached	Matsuda et al. 2020
Porites compressa	Porites	compressa	Porites compressa	Porites	compressa	branching	Pacific	Severe	4	87% bleached	Matsuda et al. 2020
Porites compressa	Porites	compressa	Porites compressa	Porites	compressa	branching	Pacific	Moderate	2	45% bleached	Matsuda et al. 2020
Acropora	Acropora	sp.	Acropora	Acropora	sp.	table / branching	Indian	Moderate	2	~33 Bleaching Index	McClanahan 2004
Astreopora	Astreopora	sp.	Astreopora	Astreopora	sp.	massive / encrusting	Indian	Low	1	~12 Bleaching Index	McClanahan 2004
Cyphastrea	Cyphastrea	sp.	Cyphastrea	Cyphastrea	sp.	massive	Indian	Low	1	~2 Bleaching Index	McClanahan 2004
Favia	Favia	sp.	Favia	Favia	sp.	plating	Indian	Moderate	2	~34 Bleaching Index	McClanahan 2004
Echinopora	Echinopora	sp.	Echinopora	Echinopora	sp.	plating	Indian	Moderate	2	~34 Bleaching Index	McClanahan 2004
Favites	Favites	sp.	Favites	Favites	sp.	massive	Indian	Low	1	~12 Bleaching Index	McClanahan 2004
Galaxea	Galaxea	sp.	Galaxea	Galaxea	sp.	massive	Indian	Moderate	2	~21 Bleaching Index	McClanahan 2004
Goniopora	Goniopora	sp.	Goniopora	Goniopora	sp.	massive	Indian	Low	1	~18 Bleaching Index	McClanahan 2004
Hydnophora	Hydnophora	sp.	Hydnophora	Hydnophora	sp.	massive	Indian	Moderate	2	~19 Bleaching Index	McClanahan 2004
Leptoria	Leptoria	sp.	Leptoria	Leptoria	sp.	massive	Indian	High	3	~46 Bleaching Index	McClanahan 2004
Montipora	Montipora	sp.	Montipora	Montipora	sp.	encrusting / plating	Indian	High	3	~46 Bleaching Index	McClanahan 2004
Pavona	Pavona	sp.	Pavona	Pavona	sp.	massive / encrusting	Indian	Low	1	~3 Bleaching Index	McClanahan 2004
Platygyra	Platygyra	sp.	Platygyra	Platygyra	sp.	massive	Indian	Moderate	2	~19 Bleaching Index	McClanahan 2004
Pocillopora	Pocillopora	sp.	Pocillopora	Pocillopora	sp.	branching	Indian	Moderate	2	~26 Bleaching Index	McClanahan 2004
Porites	Porites	sp.	Porites (branching)	Porites	sp.	branching	Indian	Moderate	2	~36 Bleaching Index	McClanahan 2004
Porites	Porites	sp.	Porites (massive)	Porites	sp.	massive	Indian	Moderate	2	~29 Bleaching Index	McClanahan 2004
Stylophora	Stylophora	sp.	Stylophora	Stylophora	sp.	branching	Indian	Moderate	2	~20 Bleaching Index	McClanahan 2004
Seriatopora	Seriatopora	sp.	Seriatopora	Seriatopora	sp.	branching	Indian	High	3	~65 Bleaching Index	McClanahan et al. 2005
Alveopora	Alveopora	sp.	Alveopora	Alveopora	sp.	massive	Indian	High	3	~65 Bleaching Index	McClanahan et al. 2005
Acropora	Acropora	sp.	Acropora	Acropora	sp.	branching	Indian	Moderate	2	~35 Bleaching Index	McClanahan et al. 2005
Goniastrea	Goniastrea	sp.	Goniastrea	Goniastrea	sp.	massive	Indian	Moderate	2	~30 Bleaching Index	McClanahan et al. 2005
Montipora	Montipora	sp.	Montipora	Montipora	sp.	encrusting / plating	Indian	Moderate	2	~30 Bleaching Index	McClanahan et al. 2005
Favia	Favia	sp.	Favia	Favia	sp.	massive	Indian	Moderate	2	~30 Bleaching Index	McClanahan et al. 2005
Lobophyllia	Lobophyllia	sp.	Lobophyllia	Lobophyllia	sp.	encrusting	Indian	Moderate	2	20 Bleaching Index	McClanahan et al. 2005
Leptoria	Leptoria	sp.	Leptoria	Leptoria	sp.	massive	Indian	Low	1	~15 Bleaching Index	McClanahan et al. 2005
Porites	Porites	sp.	Porites (branching)	Porites	sp.	branching	Indian	Low	1	~15 Bleaching Index	McClanahan et al. 2005
Cyphastrea	Cyphastrea	sp.	Cyphastrea	Cyphastrea	sp.	massive	Indian	Low	1	~15 Bleaching Index	McClanahan et al. 2005
Herpolitha	Herpolitha	sp.	Herpolitha	Herpolitha	sp.	free-living	Indian	Low	1	~15 Bleaching Index	McClanahan et al. 2005
Pocillopora	Pocillopora	sp.	Pocillopora	Pocillopora	sp.	branching	Indian	Low	1	~15 Bleaching Index	McClanahan et al. 2005
Echinopora	Echinopora	sp.	Echinopora	Echinopora	sp.	plating	Indian	Low	1	~15 Bleaching Index	McClanahan et al. 2005
Galaxea	Galaxea	sp.	Galaxea	Galaxea	sp.	massive	Indian	Low	1	~15 Bleaching Index	McClanahan et al. 2005
Lobophyllia	Lobophyllia	sp.	Symphyllia	Symphyllia	sp.	encrusting	Indian	Low	1	~15 Bleaching Index	McClanahan et al. 2005
Platygyra	Platygyra	sp.	Platygyra	Platygyra	sp.	massive	Indian	Low	1	~15 Bleaching Index	McClanahan et al. 2005
Favites	Favites	sp.	Favites	Favites	sp.	massive	Indian	Low	1	~15 Bleaching Index	McClanahan et al. 2005
Porites	Porites	sp.	Porites (massive)	Porites	sp.	massive	Indian	Low	1	~10 Bleaching Index	McClanahan et al. 2005
Astreopora	Astreopora	sp.	Astreopora	Astreopora	sp.	massive / encrusting	Indian	Low	1	~10 Bleaching Index	McClanahan et al. 2005
Goniopora	Goniopora	sp.	Goniopora	Goniopora	sp.	massive	Indian	Low	1	~10 Bleaching Index	McClanahan et al. 2005
Turbinaria	Turbinaria	sp.	Turbinaria	Turbinaria	sp.	plating	Indian	Low	1	~10 Bleaching Index	McClanahan et al. 2005
Fungia	Fungia	sp.	Fungia	Fungia	sp.	free-living	Indian	Low	1	~10 Bleaching Index	McClanahan et al. 2005
Hydnophora	Hydnophora	sp.	Hydnophora	Hydnophora	sp.	massive	Indian	Low	1	~10 Bleaching Index	McClanahan et al. 2005
Pavona	Pavona	sp.	Pavona	Pavona	sp.	massive / encrusting	Indian	Low	1	~5 Bleaching Index	McClanahan et al. 2005
Psammocora	Psammocora	sp.	Psammocora	Psammocora	sp.	encrusting	Indian	Low	1	<5 Bleaching Index	McClanahan et al. 2005
Stylophora	Stylophora	sp.	Stylophora	Stylophora	sp.	branching	Indian	Low	1	<5 Bleaching Index	McClanahan et al. 2005
Leptastrea	Leptastrea	sp.	Leptastrea	Leptastrea	sp.	encrusting	Indian	Low	1	<5 Bleaching Index	McClanahan et al. 2005
Coscinaraea	Coscinaraea	sp.	Coscinarea	Coscinarea	sp.	encrusting / plating	Indian	Low	1	<5 Bleaching Index	McClanahan et al. 2005
Gyrosmilia	Gyrosmilia	sp.	Gyrosmilia	Gyrosmilia	sp.	massive	Indian	Moderate	2	25.00 ± 35.36 Bleaching Response	McClanahan et al. 2007
Oxypora	Oxypora	sp.	Oxypora	Oxypora	sp.	plating	Indian	Moderate	2	13.89 Bleaching Response	McClanahan et al. 2007
Pachyseris	Pachyseris	sp.	Pachyseris	Pachyseris	sp.	plating	Indian	Low	1	8.33 Bleaching Response	McClanahan et al. 2007
Plesiastrea	Plesiastrea	sp.	Plesiastrea	Plesiastrea	sp.	encrusting	Indian	Moderate	2	27.08 Bleaching Response	McClanahan et al. 2007
Merulina	Merulina	sp.	Merulina	Merulina	sp.	plating	Indian	Low	1	3.33 ± 4.71 Bleaching Response	McClanahan et al. 2007
Seriatopora	Seriatopora	sp.	Seriatopora	Seriatopora	sp.	branching	Indian	High	3	30.86 ± 38.10 Bleaching Response	McClanahan et al. 2007
Alveopora	Alveopora	sp.	Alveopora	Alveopora	sp.	massive	Indian	High	3	41.13 ± 33.94 Bleaching Response	McClanahan et al. 2007
Montastraea	Montastraea	sp.	Montastrea	Montastrea	sp.	massive	Indian	Low	1	7.92 ± 20.83 Bleaching Response	McClanahan et al. 2007
Diploastrea	Diploastrea	sp.	Diploastrea	Diploastrea	sp.	massive	Indian	Low	1	5.56 ± 13.61 Bleaching Response	McClanahan et al. 2007
Oulophyllia	Oulophyllia	sp.	Oulophyllia	Oulophyllia	sp.	massive	Indian	Low	1	6.29 ± 15.62 Bleaching Response	McClanahan et al. 2007
Turbinaria	Turbinaria	sp.	Turbinaria	Turbinaria	sp.	plating	Indian	Moderate	2	16.55 ± 24.91 Bleaching Response	McClanahan et al. 2007
Stylophora	Stylophora	sp.	Stylophora	Stylophora	sp.	branching	Indian	High	3	39.73 ± 37.69 Bleaching Response	McClanahan et al. 2007
Coscinaraea	Coscinaraea	sp.	Coscinaraea	Coscinaraea	sp.	encrusting / plating	Indian	Moderate	2	18.38 ± 19.56 Bleaching Response	McClanahan et al. 2007
Herpolitha	Herpolitha	sp.	Herpolitha	Herpolitha	sp.	free-living	Indian	Low	1	5.66 ± 9.41 Bleaching Response	McClanahan et al. 2007
Gardineroseris	Gardineroseris	sp.	Gardineroseris	Gardineroseris	sp.	massive	Indian	Low	1	7.68 ± 19.46 Bleaching Response	McClanahan et al. 2007
Lobophyllia	Lobophyllia	sp.	Lobophyllia	Lobophyllia	sp.	encrusting	Indian	Moderate	2	19.72 ± 21.41 Bleaching Response	McClanahan et al. 2007
Leptastrea	Leptastrea	sp.	Leptastrea	Leptastrea	sp.	encrusting	Indian	Moderate	2	11.60 ± 21.25 Bleaching Response	McClanahan et al. 2007
Goniopora	Goniopora	sp.	Goniopora	Goniopora	sp.	massive	Indian	Moderate	2	19.63 ± 23.73 Bleaching Response	McClanahan et al. 2007
Leptoria	Leptoria	sp.	Leptoria	Leptoria	sp.	massive	Indian	Moderate	2	24.16 ± 26.64 Bleaching Response	McClanahan et al. 2007
Echinophyllia	Echinophyllia	sp.	Echinophyllia	Echinophyllia	sp.	plating	Indian	Low	1	4.76 ± 11.52 Bleaching Response	McClanahan et al. 2007
Hydnophora	Hydnophora	sp.	Hydnophora	Hydnophora	sp.	massive	Indian	Moderate	2	13.61 ± 16.15 Bleaching Response	McClanahan et al. 2007
Podabacia	Podabacia	sp.	Podabacia	Podabacia	sp.	encrusting / plating	Indian	Low	1	1.92 ± 3.59 Bleaching Response	McClanahan et al. 2007
Lobophyllia	Lobophyllia	sp.	Symphyllia	Symphyllia	sp.	encrusting	Indian	Moderate	2	9.98 ± 10.05 Bleaching Response	McClanahan et al. 2007
Cyphastrea	Cyphastrea	sp.	Cyphastrea	Cyphastrea	sp.	massive	Indian	Moderate	2	15.05 ± 22.24 Bleaching Response	McClanahan et al. 2007
Astreopora	Astreopora	sp.	Astreopora	Astreopora	sp.	massive / encrusting	Indian	Moderate	2	16.20 ± 14.97 Bleaching Response	McClanahan et al. 2007
Porites	Porites	sp.	Porites (branching)	Porites	sp.	branching	Indian	High	3	28.67 ± 33.87 Bleaching Response	McClanahan et al. 2007
Montipora	Montipora	sp.	Montipora	Montipora	sp.	encrusting / plating	Indian	High	3	34.87 ± 28.41 Bleaching Response	McClanahan et al. 2007
Echinopora	Echinopora	sp.	Echinopora	Echinopora	sp.	plating	Indian	Moderate	2	14.15 ± 19.44 Bleaching Response	McClanahan et al. 2007
Platygyra	Platygyra	sp.	Platygyra	Platygyra	sp.	massive	Indian	Moderate	2	19.36 ± 18.63 Bleaching Response	McClanahan et al. 2007
Goniastrea	Goniastrea	sp.	Goniastrea	Goniastrea	sp.	massive	Indian	Moderate	2	22.79 ± 21.49 Bleaching Response	McClanahan et al. 2007
Favia	Favia	sp.	Favia	Favia	sp.	massive	Indian	Moderate	2	24.19 ± 22.99 Bleaching Response	McClanahan et al. 2007
Favites	Favites	sp.	Favites	Favites	sp.	massive	Indian	Moderate	2	20.42 ± 18.09 Bleaching Response	McClanahan et al. 2007
Porites rus	Porites	rus	Porites rus	Porites	rus	branching / encrusting	Indian	Low	1	8.58 ± 13.89 Bleaching Response	McClanahan et al. 2007
Pocillopora	Pocillopora	sp.	Pocillopora	Pocillopora	sp.	branching	Indian	Moderate	2	27.40 ± 30.85 Bleaching Response	McClanahan et al. 2007
Acropora	Acropora	sp.	Acropora	Acropora	sp.	table / branching	Indian	High	3	28.90 ± 26.22 Bleaching Response	McClanahan et al. 2007
Fungia	Fungia	sp.	Fungia	Fungia	sp.	free-living	Indian	Moderate	2	14.84 ± 20.93 Bleaching Response	McClanahan et al. 2007
Psammocora	Psammocora	sp.	Psammocora	Psammocora	sp.	encrusting	Indian	Low	1	2.74 ± 5.16 Bleaching Response	McClanahan et al. 2007
Galaxea	Galaxea	sp.	Galaxea	Galaxea	sp.	massive	Indian	Moderate	2	14.15 ± 17.94 Bleaching Response	McClanahan et al. 2007
Pavona	Pavona	sp.	Pavona	Pavona	sp.	massive / encrusting	Indian	Low	1	8.59 ± 17.34 Bleaching Response	McClanahan et al. 2007
Porites	Porites	sp.	Porites (massive)	Porites	sp.	massive	Indian	Moderate	2	15.49 ± 19.29 Bleaching Response	McClanahan et al. 2007
Ctenactis	Ctenactis	sp.	Ctenactis	Ctenactis	sp.	free-living	Indian	None	0	0 Bleaching Response	McClanahan et al. 2007
Halomitra	Halomitra	sp.	Halomitra	Halomitra	sp.	free-living	Indian	None	0	0 Bleaching Response	McClanahan et al. 2007
Leptoseris	Leptoseris	sp.	Leptoseris	Leptoseris	sp.	encrusting	Indian	None	0	0 Bleaching Response	McClanahan et al. 2007
Pseudodiploria strigosa	Pseudodiploria	strigosa	Diploria strigosa	Diploria	strigosa	massive / encrusting	Atlantic	Low	1	~15% affected by bleaching	McField 1999
Porites astreoides	Porites	astreoides	Porites astreoides	Porites	astreoides	massive	Atlantic	Low	1	20% affected by bleaching	McField 1999
Acropora cervicornis	Acropora	cervicornis	Acropora cervicornis	Acropora	cervicornis	branching	Atlantic	Low	1	35% affected by bleaching	McField 1999
Favia fragum	Favia	fragum	Favia fragum	Favia	fragum	massive	Atlantic	Low	1	35% affected by bleaching	McField 1999
Montastraea cavernosa	Montastraea	cavernosa	Montastrea cavernosa	Montastrea	cavernosa	massive	Atlantic	Moderate	2	40% affected by bleaching	McField 1999
Porites porites	Porites	porites	Porites porites	Porites	porites	branching	Atlantic	Moderate	2	50% affected by bleaching	McField 1999
Agaricia	Agaricia	spp.	Agaricia spp.	Agaricia	spp.	branching	Atlantic	Moderate	2	50% affected by bleaching	McField 1999
Agaricia tenuifolia	Agaricia	tenuifolia	Agaricia tenuifolia	Agaricia	tenuifolia	plating	Atlantic	High	3	60% affected by bleaching	McField 1999
Siderastrea siderea	Siderastrea	siderea	Siderastrea siderea	Siderastrea	siderea	massive	Atlantic	High	3	60% affected by bleaching	McField 1999
Orbicella annularis	Orbicella	annularis	Montastrea annularis	Montastrea	annularis	massive	Atlantic	Severe	4	80% affected by bleaching	McField 1999
Agaricia	Agaricia	spp.	Agaricia spp.	Agaricia	spp.	plating	Atlantic	Severe	4	85% bleached	Miller et al. 2011
Orbicella faveolata	Orbicella	faveolata	Montastrea faveolata	Montastrea	faveolata	massive / encrusting	Atlantic	Severe	4	90% bleached	Miller et al. 2011
Porites astreoides	Porites	astreoides	Porites astreoides	Porites	astreoides	massive	Atlantic	Low	1	25% bleached	Miller et al. 2011
Porites porites	Porites	porites	Porites porites	Porites	porites	branching	Atlantic	Low	1	~27% bleached	Miller et al. 2011
Siderastrea siderea	Siderastrea	siderea	Siderastrea siderea	Siderastrea	siderea	massive	Atlantic	High	3	75% bleached	Miller et al. 2011
Diploria	Diploria	spp.	Diploria spp.	Diploria	spp.	massive / encrusting	Atlantic	Moderate	2	~38% bleached	Miller et al. 2011
Agaricia	Agaricia	spp.	Agaricia spp.	Agaricia	spp.	plating	Atlantic	High	3	70% bleached	Miller et al. 2011
Orbicella faveolata	Orbicella	faveolata	Montastrea faveolata	Montastrea	faveolata	massive / encrusting	Atlantic	High	3	60% bleached	Miller et al. 2011
Porites astreoides	Porites	astreoides	Porites astreoides	Porites	astreoides	massive	Atlantic	Low	1	~7% bleached	Miller et al. 2011
Porites porites	Porites	porites	Porites porites	Porites	porites	branching	Atlantic	Low	1	~35% bleached	Miller et al. 2011
Siderastrea siderea	Siderastrea	siderea	Siderastrea siderea	Siderastrea	siderea	massive	Atlantic	Low	1	5% bleached	Miller et al. 2011
Diploria	Diploria	spp.	Diploria spp.	Diploria	spp.	massive / encrusting	Atlantic	Low	1	15% bleached	Miller et al. 2011
Porites	Porites	sp.	Porites	Porites	sp.	massive	Indian	Moderate	2	30% bleaching	Monroe et al. 2018
Pocillopora	Pocillopora	sp.	Pocillopora	Pocillopora	sp.	branching	Indian	Low	1	~20% bleaching	Monroe et al. 2018
Acropora	Acropora	sp.	Acropora	Acropora	sp.	branching	Indian	Moderate	2	35% bleaching	Monroe et al. 2018
Goniastrea	Goniastrea	sp.	Goniastrea	Goniastrea	sp.	massive	Indian	Moderate	2	~30% bleaching	Monroe et al. 2018
Echinopora	Echinopora	sp.	Echinopora	Echinopora	sp.	plating	Indian	Low	1	~20% bleaching	Monroe et al. 2018
Stylophora	Stylophora	sp.	Stylophora	Stylophora	sp.	branching	Indian	Low	1	20% bleaching	Monroe et al. 2018
Montipora	Montipora	sp.	Montipora	Montipora	sp.	encrusting / plating	Indian	Moderate	2	35% bleaching	Monroe et al. 2018
Galaxea	Galaxea	sp.	Galaxea	Galaxea	sp.	massive	Indian	Low	1	20% bleaching	Monroe et al. 2018
Diploastrea	Diploastrea	sp.	Diploastrea	Diploastrea	sp.	massive	Indian	Low	1	~5% bleaching	Monroe et al. 2018
Astreopora	Astreopora	sp.	Astreopora	Astreopora	sp.	massive / encrusting	Indian	Moderate	2	~35% bleached	Monroe et al. 2018
Dipsastraea	Dipsastraea	sp.	Dipsastraea	Dipsastraea	sp.	massive	Indian	Moderate	2	30% bleaching	Monroe et al. 2018
Pavona	Pavona	sp.	Pavona	Pavona	sp.	massive / encrusting	Indian	Moderate	2	~50% bleaching	Monroe et al. 2018
Goniopora	Goniopora	sp.	Goniopora	Goniopora	sp.	massive	Indian	High	3	80% bleaching	Monroe et al. 2018
Platygyra	Platygyra	sp.	Platygyra	Platygyra	sp.	massive	Indian	Low	1	~20% bleaching	Monroe et al. 2018
Leptastrea	Leptastrea	sp.	Leptastrea	Leptastrea	sp.	encrusting	Indian	High	3	~60% bleaching	Monroe et al. 2018
Favites	Favites	sp.	Favites	Favites	sp.	massive	Indian	Low	1	~5% bleaching	Monroe et al. 2018
Pocillopora	Pocillopora	spp.	Pocillopora	Pocillopora	eydouxi	branching	Indian	High	3	50% bleached	Montano et al. 2010
Pocillopora	Pocillopora	spp.	Pocillopora	Pocillopora	verrucosa	branching	Indian	High	3	44.8% bleached	Montano et al. 2010
Acropora	Acropora	sp.	Acropora	Acropora	sp.	branching	Indian	Low	1	6.7% bleached	Montano et al. 2010
Favia	Favia	sp.	Favia	Favia	sp.	massive	Indian	None	0	0% bleached	Montano et al. 2010
Platygyra	Platygyra	sp.	Platygyra	Platygyra	sp.	massive	Indian	Low	1	3.2% bleached	Montano et al. 2010
Galaxea	Galaxea	sp.	Galaxea	Galaxea	sp.	massive	Indian	Low	1	10% bleached	Montano et al. 2010
Echinopora	Echinopora	sp.	Echinopora	Echinopora	sp.	encrusting / plating	Indian	Low	1	10% bleached	Montano et al. 2010
Porites	Porites	sp.	Porites	Porites	sp.	massive	Indian	None	0	0% bleached	Montano et al. 2010
Acropora	Acropora	spp.	Acropora	Acropora	spp.	table / branching	Pacific	Low	1	2% bleached; 0.01 Bleaching Index	Morgan et al. 2017
Favites	Favites	spp.	Favites	Favites	spp.	massive	Pacific	Low	1	3% bleached; 21 Bleaching Index	Morgan et al. 2017
Fungia	Fungia	spp.	Fungia	Fungia	spp.	free-living	Pacific	Low	1	0.6% bleached; 0.7 Bleaching Index	Morgan et al. 2017
Coelastrea	Coelastrea	spp.	Coelastrea	Coelastrea	spp.	massive / encrusting	Pacific	Low	1	1.2% bleached; 36 Bleaching Index	Morgan et al. 2017
Hydnophora	Hydnophora	spp.	Hydnophora	Hydnophora	spp.	massive	Pacific	Low	1	0.6% bleached; 6.1 Bleaching Index	Morgan et al. 2017
Lobophyllia	Lobophyllia	spp.	Lobophyllia	Lobophyllia	spp.	encrusting	Pacific	Low	1	9% bleached; 5.1 Bleaching Index	Morgan et al. 2017
Montipora	Montipora	spp.	Montipora	Montipora	spp.	encrusting / plating	Pacific	Moderate	2	37% bleached; 0.1 Bleaching Index	Morgan et al. 2017
Pavona	Pavona	spp.	Pavona	Pavona	spp.	massive / encrusting	Pacific	Low	1	3% bleached; 2 Bleaching Index	Morgan et al. 2017
Platygyra	Platygyra	spp.	Platygyra	Platygyra	spp.	massive	Pacific	Low	1	0.6% bleached; 1.6 Bleaching Index	Morgan et al. 2017
Porites	Porites	spp.	Porites	Porites	spp.	massive	Pacific	Moderate	2	40% bleached; 5.9 Bleaching Index	Morgan et al. 2017
Stylophora	Stylophora	spp.	Stylophora	Stylophora	spp.	branching	Pacific	Low	1	0.6% bleached; 9.1 Bleaching Index	Morgan et al. 2017
Turbinaria	Turbinaria	spp.	Turbinaria	Turbinaria	spp.	plating	Pacific	Low	1	2% bleached; 0.02 Bleaching Index	Morgan et al. 2017
Agaricia agaricites	Agaricia	agaricites	Agaricia agaricites	Agaricia	agaricites	plating	Atlantic	Low	1	~13 Bleaching Severity Index	Muñiz-Castillo & Arias-González 2021
Orbicella franksi	Orbicella	franksi	Orbicella franksi	Orbicella	franksi	massive	Atlantic	Low	1	~16 Bleaching Severity Index	Muñiz-Castillo & Arias-González 2021
Orbicella faveolata	Orbicella	faveolata	Orbicella faveolata	Orbicella	faveolata	massive / encrusting	Atlantic	Low	1	~7 Bleaching Severity Index	Muñiz-Castillo & Arias-González 2021
Montastraea cavernosa	Montastraea	cavernosa	Montastraea cavernosa	Montastraea	cavernosa	massive	Atlantic	Low	1	~7 Bleaching Severity Index	Muñiz-Castillo & Arias-González 2021
Siderastrea siderea	Siderastrea	siderea	Siderastrea siderea	Siderastrea	siderea	massive	Atlantic	Low	1	~6 Bleaching Severity Index	Muñiz-Castillo & Arias-González 2021
Siderastrea radians	Siderastrea	radians	Siderastrea radians	Siderastrea	radians	massive / encrusting	Atlantic	Low	1	~5 Bleaching Severity Index	Muñiz-Castillo & Arias-González 2021
Acropora palmata	Acropora	palmata	Acropora palmata	Acropora	palmata	table / branching	Atlantic	Low	1	~6 Bleaching Severity Index	Muñiz-Castillo & Arias-González 2021
Acropora cervicornis / prolifera	Acropora	cervicornis / prolifera	Acropora cervicornis / prolifera	Acropora	cervicornis / prolifera	branching	Atlantic	Low	1	~5 Bleaching Severity Index	Muñiz-Castillo & Arias-González 2021
Porites astreoides	Porites	astreoides	Porites astreoides	Porites	astreoides	massive / encrusting	Atlantic	Low	1	~5 Bleaching Severity Index	Muñiz-Castillo & Arias-González 2021
Porites furcata / divaricata	Porites	furcata / divaricata	Porites furcata / divaricata	Porites	furcata / divaricata	columnar	Atlantic	Low	1	~3 Bleaching Severity Index	Muñiz-Castillo & Arias-González 2021
Porites porites	Porites	porites	Porites porites	Porites	porites	branching	Atlantic	Low	1	~2 Bleaching Severity Index	Muñiz-Castillo & Arias-González 2021
Pseudodiploria clivosa	Pseudodiploria	clivosa	Pseudodiploria clivosa	Pseudodiploria	clivosa	massive / encrusting	Atlantic	Low	1	~2 Bleaching Severity Index	Muñiz-Castillo & Arias-González 2021
Pseudodiploria strigosa	Pseudodiploria	strigosa	Pseudodiploria strigosa	Pseudodiploria	strigosa	massive / encrusting	Atlantic	Low	1	~2 Bleaching Severity Index	Muñiz-Castillo & Arias-González 2021
Stephanocoenia intersepta	Stephanocoenia	intersepta	Stephanocoenia intersepta	Stephanocoenia	intersepta	massive / encrusting	Atlantic	Low	1	~2 Bleaching Severity Index	Muñiz-Castillo & Arias-González 2021
Colpophyllia natans	Colpophyllia	natans	Colpophyllia natans	Colpophyllia	natans	massive / encrusting	Atlantic	None	0	0 Bleaching Severity Index	Muñiz-Castillo & Arias-González 2021
Lithophyllon concinna	Lithophyllon	concinna	Lithophyllon concinna	Lithophyllon	concinna	free-living	Pacific	Low	1	33 Bleaching Index	Ng et al. 2020
Pectinia lactuca	Pectinia	lactuca	Pectinia lactuca	Pectinia	lactuca	plating	Pacific	Moderate	2	45 Bleaching Index	Ng et al. 2020
Leptastrea purpurea	Leptastrea	purpurea	Leptastrea purpurea	Leptastrea	purpurea	encrusting	Pacific	Moderate	2	45 Bleaching Index	Ng et al. 2020
Coelastrea aspera	Coelastrea	aspera	Coelastrea aspera	Coelastrea	aspera	massive	Pacific	Moderate	2	45 Bleaching Index	Ng et al. 2020
Herpolitha limax	Herpolitha	limax	Herpolitha limax	Herpolitha	limax	free-living	Pacific	Low	1	30 Bleaching Index	Ng et al. 2020
Pachyseris speciosa	Pachyseris	speciosa	Pachyseris speciosa	Pachyseris	speciosa	plating	Pacific	Moderate	2	40 Bleaching Index	Ng et al. 2020
Acanthastrea echinata	Acanthastrea	echinata	Acanthastrea echinata	Acanthastrea	echinata	encrusting	Pacific	Moderate	2	53 Bleaching Index	Ng et al. 2020
Dipsastraea maxima	Dipsastraea	maxima	Dipsastraea maxima	Dipsastraea	maxima	massive	Pacific	High	3	65 Bleaching Index	Ng et al. 2020
Cyphastrea chalcidicum	Cyphastrea	chalcidicum	Cyphastrea chalcidicum	Cyphastrea	chalcidicum	massive / encrusting	Pacific	Low	1	33 Bleaching Index	Ng et al. 2020
Ctenactis echinata	Ctenactis	echinata	Ctenactis echinata	Ctenactis	echinata	free-living	Pacific	Low	1	35 Bleaching Index	Ng et al. 2020
Pectinia paeonia	Pectinia	paeonia	Pectinia paeonia	Pectinia	paeonia	plating	Pacific	Moderate	2	54 Bleaching Index	Ng et al. 2020
Psammocora haimiana	Psammocora	haimiana	Psammocora haimiana	Psammocora	haimiana	encrusting	Pacific	High	3	76 Bleaching Index	Ng et al. 2020
Turbinaria mesenterina	Turbinaria	mesenterina	Turbinaria mesenterina	Turbinaria	mesenterina	plating	Pacific	Low	1	35 Bleaching Index	Ng et al. 2020
Porites spp.	Porites	spp.	Porites spp.	Porites	spp.	massive	Pacific	Moderate	2	53 Bleaching Index	Ng et al. 2020
Diploastrea heliopora	Diploastrea	heliopora	Diploastrea heliopora	Diploastrea	heliopora	massive	Pacific	Low	1	34 Bleaching Index	Ng et al. 2020
Ctenactis crassa	Ctenactis	crassa	Ctenactis crassa	Ctenactis	crassa	free-living	Pacific	Low	1	13 Bleaching Index	Ng et al. 2020
Lithophyllon repanda	Lithophyllon	repanda	Lithophyllon repanda	Lithophyllon	repanda	free-living	Pacific	Low	1	33 Bleaching Index	Ng et al. 2020
Merulina ampliata	Merulina	ampliata	Merulina ampliata	Merulina	ampliata	plating	Pacific	High	3	60 Bleaching Index	Ng et al. 2020
Galaxea fascicularis	Galaxea	fascicularis	Galaxea fascicularis	Galaxea	fascicularis	massive	Pacific	Low	1	31 Bleaching Index	Ng et al. 2020
Podabacia crustacea	Podabacia	crustacea	Podabacia crustacea	Podabacia	crustacea	encrusting	Pacific	Low	1	35 Bleaching Index	Ng et al. 2020
Platygyra lamellina	Platygyra	lamellina	Platygyra lamellina	Platygyra	lamellina	massive	Pacific	Severe	4	90 Bleaching Index	Ng et al. 2020
Pavona explanulata	Pavona	explanulata	Pavona explanulata	Pavona	explanulata	encrusting	Pacific	Severe	4	95 Bleaching Index	Ng et al. 2020
Merulina scabricula	Merulina	scabricula	Merulina scabricula	Merulina	scabricula	plating	Pacific	Severe	4	80 Bleaching Index	Ng et al. 2020
Acanthastrea rotundoflora	Acanthastrea	rotundoflora	Acanthastrea rotundoflora	Acanthastrea	rotundoflora	encrusting	Pacific	Severe	4	80 Bleaching Index	Ng et al. 2020
Lobophyllia radians	Lobophyllia	radians	Lobophyllia radians	Lobophyllia	radians	encrusting	Pacific	High	3	68 Bleaching Index	Ng et al. 2020
Dipsastraea matthaii	Dipsastraea	matthaii	Dipsastraea matthaii	Dipsastraea	matthaii	massive	Pacific	Severe	4	100 Bleaching Index	Ng et al. 2020
Dipsastraea speciosa	Dipsastraea	speciosa	Dipsastraea speciosa	Dipsastraea	speciosa	massive	Pacific	Severe	4	80 Bleaching Index	Ng et al. 2020
Lobophyllia recta	Lobophyllia	recta	Lobophyllia recta	Lobophyllia	recta	encrusting	Pacific	High	3	76 Bleaching Index	Ng et al. 2020
Favites halicora	Favites	halicora	Favites halicora	Favites	halicora	massive / encrusting	Pacific	Severe	4	84 Bleaching Index	Ng et al. 2020
Dipsastraea favus	Dipsastraea	favus	Dipsastraea favus	Dipsastraea	favus	massive	Pacific	High	3	69 Bleaching Index	Ng et al. 2020
Hydnophora exesa	Hydnophora	exesa	Hydnophora exesa	Hydnophora	exesa	encrusting	Pacific	Severe	4	90 Bleaching Index	Ng et al. 2020
Dipsastraea lizardensis	Dipsastraea	lizardensis	Dipsastraea lizardensis	Dipsastraea	lizardensis	massive	Pacific	Severe	4	90 Bleaching Index	Ng et al. 2020
Montipora monasteriata	Montipora	monasteriata	Montipora monasteriata	Montipora	monasteriata	encrusting / plating	Pacific	High	3	60 Bleaching Index	Ng et al. 2020
Platygyra sinensis	Platygyra	sinensis	Platygyra sinensis	Platygyra	sinensis	massive	Pacific	Severe	4	84 Bleaching Index	Ng et al. 2020
Favites complanata	Favites	complanata	Favites complanata	Favites	complanata	massive	Pacific	High	3	64 Bleaching Index	Ng et al. 2020
Favites pentagona	Favites	pentagona	Favites pentagona	Favites	pentagona	massive	Pacific	High	3	72 Bleaching Index	Ng et al. 2020
Echinopora lamellosa	Echinopora	lamellosa	Echinopora lamellosa	Echinopora	lamellosa	plating	Pacific	High	3	63 Bleaching Index	Ng et al. 2020
Platygyra pini	Platygyra	pini	Platygyra pini	Platygyra	pini	massive	Pacific	Severe	4	83 Bleaching Index	Ng et al. 2020
Lithophyllon undulatum	Lithophyllon	undulatum	Lithophyllon undulatum	Lithophyllon	undulatum	encrusting	Pacific	Moderate	2	55 Bleaching Index	Ng et al. 2020
Caulastraea echinulata	Caulastraea	echinulata	Caulastraea echinulata	Caulastraea	echinulata	encrusting	Pacific	High	3	71 Bleaching Index	Ng et al. 2020
Goniastrea pectinata	Goniastrea	pectinata	Goniastrea pectinata	Goniastrea	pectinata	massive	Pacific	High	3	65 Bleaching Index	Ng et al. 2020
Favites valenciennesi	Favites	valenciennesi	Favites valenciennesi	Favites	valenciennesi	massive / encrusting	Pacific	Severe	4	82 Bleaching Index	Ng et al. 2020
Favites abdita	Favites	abdita	Favites abdita	Favites	abdita	massive	Pacific	High	3	79 Bleaching Index	Ng et al. 2020
Psammocora contigua	Psammocora	contigua	Psammocora contigua	Psammocora	contigua	branching / plating	Pacific	Moderate	2	58 Bleaching Index	Ng et al. 2020
Goniastrea retiformis	Goniastrea	retiformis	Goniastrea retiformis	Goniastrea	retiformis	massive	Pacific	Severe	4	85 Bleaching Index	Ng et al. 2020
Cyphastrea serailia	Cyphastrea	serailia	Cyphastrea serailia	Cyphastrea	serailia	massive / encrusting	Pacific	Moderate	2	52 Bleaching Index	Ng et al. 2020
Pocillopora acuta	Pocillopora	acuta	Pocillopora acuta	Pocillopora	acuta	branching	Pacific	High	3	60 Bleaching Index	Ng et al. 2020
Turbinaria peltata	Turbinaria	peltata	Turbinaria peltata	Turbinaria	peltata	plating	Pacific	Moderate	2	53 Bleaching Index	Ng et al. 2020
Turbinaria stellulata	Turbinaria	stellulata	Turbinaria stellulata	Turbinaria	stellulata	encrusting	Pacific	Low	1	20 Bleaching Index	Ng et al. 2020
Dipsastraea pallida	Dipsastraea	pallida	Dipsastraea pallida	Dipsastraea	pallida	massive	Pacific	Low	1	36 Bleaching Index	Ng et al. 2020
Goniopora lobata	Goniopora	lobata	Goniopora lobata	Goniopora	lobata	massive	Pacific	Low	1	33 Bleaching Index	Ng et al. 2020
Lithophyllon scabra	Lithophyllon	scabra	Lithophyllon scabra	Lithophyllon	scabra	free-living	Pacific	Moderate	2	52 Bleaching Index	Ng et al. 2020
Cyphastrea microphthalma	Cyphastrea	microphthalma	Cyphastrea microphthalma	Cyphastrea	microphthalma	massive / encrusting	Pacific	Low	1	30 Bleaching Index	Ng et al. 2020
Leptastrea pruinosa	Leptastrea	pruinosa	Leptastrea pruinosa	Leptastrea	pruinosa	encrusting	Pacific	Low	1	20 Bleaching Index	Ng et al. 2020
Pavona frondifera	Pavona	frondifera	Pavona frondifera	Pavona	frondifera	plating	Pacific	Moderate	2	45 Bleaching Index	Ng et al. 2020
Pectinia crassa	Pectinia	crassa	Pectinia crassa	Pectinia	crassa	plating	Pacific	Low	1	30 Bleaching Index	Ng et al. 2020
Hydnophora grandis	Hydnophora	grandis	Hydnophora grandis	Hydnophora	grandis	encrusting	Pacific	Low	1	20 Bleaching Index	Ng et al. 2020
Favites chinensis	Favites	chinensis	Favites chinensis	Favites	chinensis	massive	Pacific	Moderate	2	50 Bleaching Index	Ng et al. 2020
Oulastrea crispata	Oulastrea	crispata	Oulastrea crispata	Oulastrea	crispata	encrusting	Pacific	Moderate	2	40 Bleaching Index	Ng et al. 2020
Bernardpora stutchburyi	Bernardpora	stutchburyi	Bernardpora stutchburyi	Bernardpora	stutchburyi	massive / encrusting	Pacific	Moderate	2	40 Bleaching Index	Ng et al. 2020
Lithophyllon concinna	Lithophyllon	concinna	Lithophyllon concinna	Lithophyllon	concinna	free-living	Pacific	Low	1	13 Bleaching Index	Ng et al. 2020
Pectinia lactuca	Pectinia	lactuca	Pectinia lactuca	Pectinia	lactuca	plating	Pacific	None	0	0 Bleaching Index	Ng et al. 2020
Leptastrea purpurea	Leptastrea	purpurea	Leptastrea purpurea	Leptastrea	purpurea	encrusting	Pacific	Low	1	10 Bleaching Index	Ng et al. 2020
Coelastrea aspera	Coelastrea	aspera	Coelastrea aspera	Coelastrea	aspera	massive	Pacific	Low	1	17 Bleaching Index	Ng et al. 2020
Herpolitha limax	Herpolitha	limax	Herpolitha limax	Herpolitha	limax	free-living	Pacific	None	0	0 Bleaching Index	Ng et al. 2020
Pachyseris speciosa	Pachyseris	speciosa	Pachyseris speciosa	Pachyseris	speciosa	plating	Pacific	Low	1	10 Bleaching Index	Ng et al. 2020
Acanthastrea echinata	Acanthastrea	echinata	Acanthastrea echinata	Acanthastrea	echinata	encrusting	Pacific	Low	1	7 Bleaching Index	Ng et al. 2020
Dipsastraea maxima	Dipsastraea	maxima	Dipsastraea maxima	Dipsastraea	maxima	massive	Pacific	Low	1	15 Bleaching Index	Ng et al. 2020
Cyphastrea chalcidicum	Cyphastrea	chalcidicum	Cyphastrea chalcidicum	Cyphastrea	chalcidicum	massive / encrusting	Pacific	Low	1	15 Bleaching Index	Ng et al. 2020
Ctenactis echinata	Ctenactis	echinata	Ctenactis echinata	Ctenactis	echinata	free-living	Pacific	Low	1	17 Bleaching Index	Ng et al. 2020
Pectinia paeonia	Pectinia	paeonia	Pectinia paeonia	Pectinia	paeonia	plating	Pacific	Low	1	12 Bleaching Index	Ng et al. 2020
Psammocora haimiana	Psammocora	haimiana	Psammocora haimiana	Psammocora	haimiana	encrusting	Pacific	Low	1	30 Bleaching Index	Ng et al. 2020
Turbinaria mesenterina	Turbinaria	mesenterina	Turbinaria mesenterina	Turbinaria	mesenterina	plating	Pacific	Low	1	19 Bleaching Index	Ng et al. 2020
Porites spp.	Porites	spp.	Porites spp.	Porites	spp.	massive	Pacific	Low	1	22 Bleaching Index	Ng et al. 2020
Diploastrea heliopora	Diploastrea	heliopora	Diploastrea heliopora	Diploastrea	heliopora	massive	Pacific	Low	1	12 Bleaching Index	Ng et al. 2020
Ctenactis crassa	Ctenactis	crassa	Ctenactis crassa	Ctenactis	crassa	free-living	Pacific	Low	1	20 Bleaching Index	Ng et al. 2020
Lithophyllon repanda	Lithophyllon	repanda	Lithophyllon repanda	Lithophyllon	repanda	free-living	Pacific	Low	1	20 Bleaching Index	Ng et al. 2020
Merulina ampliata	Merulina	ampliata	Merulina ampliata	Merulina	ampliata	plating	Pacific	Low	1	22 Bleaching Index	Ng et al. 2020
Galaxea fascicularis	Galaxea	fascicularis	Galaxea fascicularis	Galaxea	fascicularis	massive	Pacific	Low	1	10 Bleaching Index	Ng et al. 2020
Podabacia crustacea	Podabacia	crustacea	Podabacia crustacea	Podabacia	crustacea	encrusting	Pacific	Low	1	13 Bleaching Index	Ng et al. 2020
Platygyra lamellina	Platygyra	lamellina	Platygyra lamellina	Platygyra	lamellina	massive	Pacific	Low	1	7 Bleaching Index	Ng et al. 2020
Pavona explanulata	Pavona	explanulata	Pavona explanulata	Pavona	explanulata	encrusting	Pacific	Low	1	25 Bleaching Index	Ng et al. 2020
Merulina scabricula	Merulina	scabricula	Merulina scabricula	Merulina	scabricula	plating	Pacific	Low	1	22 Bleaching Index	Ng et al. 2020
Acanthastrea rotundoflora	Acanthastrea	rotundoflora	Acanthastrea rotundoflora	Acanthastrea	rotundoflora	encrusting	Pacific	Low	1	20 Bleaching Index	Ng et al. 2020
Lobophyllia radians	Lobophyllia	radians	Lobophyllia radians	Lobophyllia	radians	encrusting	Pacific	Low	1	17 Bleaching Index	Ng et al. 2020
Dipsastraea matthaii	Dipsastraea	matthaii	Dipsastraea matthaii	Dipsastraea	matthaii	massive	Pacific	Low	1	15 Bleaching Index	Ng et al. 2020
Dipsastraea speciosa	Dipsastraea	speciosa	Dipsastraea speciosa	Dipsastraea	speciosa	massive	Pacific	Low	1	15 Bleaching Index	Ng et al. 2020
Lobophyllia recta	Lobophyllia	recta	Lobophyllia recta	Lobophyllia	recta	encrusting	Pacific	Low	1	15 Bleaching Index	Ng et al. 2020
Favites halicora	Favites	halicora	Favites halicora	Favites	halicora	massive / encrusting	Pacific	Low	1	12 Bleaching Index	Ng et al. 2020
Dipsastraea favus	Dipsastraea	favus	Dipsastraea favus	Dipsastraea	favus	massive	Pacific	Low	1	20 Bleaching Index	Ng et al. 2020
Hydnophora exesa	Hydnophora	exesa	Hydnophora exesa	Hydnophora	exesa	encrusting	Pacific	None	0	0 Bleaching Index	Ng et al. 2020
Dipsastraea lizardensis	Dipsastraea	lizardensis	Dipsastraea lizardensis	Dipsastraea	lizardensis	massive	Pacific	Low	1	20 Bleaching Index	Ng et al. 2020
Montipora monasteriata	Montipora	monasteriata	Montipora monasteriata	Montipora	monasteriata	encrusting / plating	Pacific	Low	1	9 Bleaching Index	Ng et al. 2020
Platygyra sinensis	Platygyra	sinensis	Platygyra sinensis	Platygyra	sinensis	massive	Pacific	Low	1	17 Bleaching Index	Ng et al. 2020
Favites complanata	Favites	complanata	Favites complanata	Favites	complanata	massive	Pacific	Low	1	16 Bleaching Index	Ng et al. 2020
Favites pentagona	Favites	pentagona	Favites pentagona	Favites	pentagona	massive	Pacific	Low	1	13 Bleaching Index	Ng et al. 2020
Echinopora lamellosa	Echinopora	lamellosa	Echinopora lamellosa	Echinopora	lamellosa	plating	Pacific	Low	1	15 Bleaching Index	Ng et al. 2020
Platygyra pini	Platygyra	pini	Platygyra pini	Platygyra	pini	massive	Pacific	Low	1	21 Bleaching Index	Ng et al. 2020
Lithophyllon undulatum	Lithophyllon	undulatum	Lithophyllon undulatum	Lithophyllon	undulatum	encrusting	Pacific	Low	1	18 Bleaching Index	Ng et al. 2020
Caulastraea echinulata	Caulastraea	echinulata	Caulastraea echinulata	Caulastraea	echinulata	encrusting	Pacific	Low	1	24 Bleaching Index	Ng et al. 2020
Goniastrea pectinata	Goniastrea	pectinata	Goniastrea pectinata	Goniastrea	pectinata	massive	Pacific	Low	1	27 Bleaching Index	Ng et al. 2020
Favites valenciennesi	Favites	valenciennesi	Favites valenciennesi	Favites	valenciennesi	massive / encrusting	Pacific	Low	1	20 Bleaching Index	Ng et al. 2020
Favites abdita	Favites	abdita	Favites abdita	Favites	abdita	massive	Pacific	Low	1	24 Bleaching Index	Ng et al. 2020
Psammocora contigua	Psammocora	contigua	Psammocora contigua	Psammocora	contigua	branching / plating	Pacific	Low	1	20 Bleaching Index	Ng et al. 2020
Goniastrea retiformis	Goniastrea	retiformis	Goniastrea retiformis	Goniastrea	retiformis	massive	Pacific	Low	1	33 Bleaching Index	Ng et al. 2020
Cyphastrea serailia	Cyphastrea	serailia	Cyphastrea serailia	Cyphastrea	serailia	massive / encrusting	Pacific	Low	1	22 Bleaching Index	Ng et al. 2020
Pocillopora acuta	Pocillopora	acuta	Pocillopora acuta	Pocillopora	acuta	branching	Pacific	Low	1	24 Bleaching Index	Ng et al. 2020
Turbinaria peltata	Turbinaria	peltata	Turbinaria peltata	Turbinaria	peltata	plating	Pacific	Low	1	30 Bleaching Index	Ng et al. 2020
Turbinaria stellulata	Turbinaria	stellulata	Turbinaria stellulata	Turbinaria	stellulata	encrusting	Pacific	Low	1	16 Bleaching Index	Ng et al. 2020
Dipsastraea pallida	Dipsastraea	pallida	Dipsastraea pallida	Dipsastraea	pallida	massive	Pacific	Low	1	25 Bleaching Index	Ng et al. 2020
Goniopora lobata	Goniopora	lobata	Goniopora lobata	Goniopora	lobata	massive	Pacific	Low	1	35 Bleaching Index	Ng et al. 2020
Lithophyllon scabra	Lithophyllon	scabra	Lithophyllon scabra	Lithophyllon	scabra	free-living	Pacific	Low	1	31 Bleaching Index	Ng et al. 2020
Cyphastrea microphthalma	Cyphastrea	microphthalma	Cyphastrea microphthalma	Cyphastrea	microphthalma	massive / encrusting	Pacific	Low	1	20 Bleaching Index	Ng et al. 2020
Leptastrea pruinosa	Leptastrea	pruinosa	Leptastrea pruinosa	Leptastrea	pruinosa	encrusting	Pacific	Low	1	10 Bleaching Index	Ng et al. 2020
Pavona frondifera	Pavona	frondifera	Pavona frondifera	Pavona	frondifera	plating	Pacific	Low	1	18 Bleaching Index	Ng et al. 2020
Pectinia crassa	Pectinia	crassa	Pectinia crassa	Pectinia	crassa	plating	Pacific	Low	1	10 Bleaching Index	Ng et al. 2020
Hydnophora grandis	Hydnophora	grandis	Hydnophora grandis	Hydnophora	grandis	encrusting	Pacific	Low	1	29 Bleaching Index	Ng et al. 2020
Favites chinensis	Favites	chinensis	Favites chinensis	Favites	chinensis	massive	Pacific	Low	1	30 Bleaching Index	Ng et al. 2020
Oulastrea crispata	Oulastrea	crispata	Oulastrea crispata	Oulastrea	crispata	encrusting	Pacific	Low	1	31 Bleaching Index	Ng et al. 2020
Bernardpora stutchburyi	Bernardpora	stutchburyi	Bernardpora stutchburyi	Bernardpora	stutchburyi	massive / encrusting	Pacific	Low	1	35 Bleaching Index	Ng et al. 2020
Acropora eurystoma	Acropora	eurystoma	Acropora eurystoma	Acropora	eurystoma	branching	Indian	Severe	4	82.41 ± 28.99% bleaching prevalence	Obura 2001
Echinopora gemmifera	Echinopora	gemmifera	Echinopora gemmifera	Echinopora	gemmifera	corymbose	Indian	Low	1	15.15 ± 32.95% bleaching prevalence	Obura 2001
Favites pentagona	Favites	pentagona	Favites pentagona	Favites	pentagona	massive	Indian	Low	1	5.83 ± 21.04% bleaching prevalence	Obura 2001
Dipsastraea favus	Dipsastraea	favus	Favia favus	Favia	favus	massive	Indian	Low	1	11.11 ± 32.03% bleaching prevalence	Obura 2001
Galaxea astreata	Galaxea	astreata	Galaxea astreata	Galaxea	astreata	massive	Indian	Severe	4	83.41 ± 34.14% bleaching prevalence	Obura 2001
Galaxea fascicularis	Galaxea	fascicularis	Galaxea fascicularis	Galaxea	fascicularis	massive	Indian	Low	1	14.32 ± 34.08% bleaching prevalence	Obura 2001
Hydnophora exesa	Hydnophora	exesa	Hydnophora exesa	Hydnophora	exesa	encrusting	Indian	Low	1	5.33 ± 20.66% bleaching prevalence	Obura 2001
Montipora tuberculosa	Montipora	tuberculosa	Montipora tuberculosa	Montipora	tuberculosa	encrusting	Indian	High	3	75.88 ± 43.45% bleaching prevalence	Obura 2001
Pavona varians	Pavona	varians	Pavona varians	Pavona	varians	encrusting	Indian	Moderate	2	49.17 ± 46.80% bleaching prevalence	Obura 2001
Platygyra daedalea	Platygyra	daedalea	Platygyra daedalea	Platygyra	daedalea	massive	Indian	Low	1	3.57 ± 18.90% bleaching prevalence	Obura 2001
Pocillopora damicornis	Pocillopora	damicornis	Pocillopora damicornis	Pocillopora	damicornis	branching	Indian	High	3	73.90 ± 38.59% bleaching prevalence	Obura 2001
Pocillopora verrucosa	Pocillopora	verrucosa	Pocillopora verrucosa	Pocillopora	verrucosa	branching	Indian	Moderate	2	42.50 ± 47.60% bleaching prevalence	Obura 2001
Porites lutea	Porites	lutea	Porites lutea	Porites	lutea	massive	Indian	Low	1	33.70 ± 43.88% bleaching prevalence	Obura 2001
Porites nigrescens	Porites	nigrescens	Porites nigrescens	Porites	nigrescens	branching	Indian	High	3	73.31 ± 39.02% bleaching prevalence	Obura 2001
Acropora	Acropora	spp.	Acropora	Acropora	spp.	table / branching	Indian	Low	1	22% bleached or pale	Obura et al. 2018
Coscinaraea	Coscinaraea	spp.	Coscinaraea	Coscinaraea	spp.	encrusting / plating	Indian	Low	1	36% bleached or pale	Obura et al. 2018
Dipsastraea	Dipsastraea	spp.	Dipsastraea	Dipsastraea	spp.	massive	Indian	High	3	~60% bleached or pale	Obura et al. 2018
Echinopora	Echinopora	spp.	Echinopora	Echinopora	spp.	plating	Indian	Moderate	2	38% bleached or pale	Obura et al. 2018
Favites	Favites	spp.	Favites	Favites	spp.	massive	Indian	Low	1	24% bleached or pale	Obura et al. 2018
Fungia	Fungia	spp.	Fungia	Fungia	spp.	free-living	Indian	Moderate	2	~48% bleached or pale	Obura et al. 2018
Galaxea	Galaxea	spp.	Galaxea	Galaxea	spp.	massive	Indian	Moderate	2	45% bleached or pale	Obura et al. 2018
Goniastrea	Goniastrea	spp.	Goniastrea	Goniastrea	spp.	massive	Indian	Moderate	2	55% bleached or pale	Obura et al. 2018
Hydnophora	Hydnophora	spp.	Hydnophora	Hydnophora	spp.	massive	Indian	Moderate	2	40% bleached or pale	Obura et al. 2018
Leptastrea	Leptastrea	spp.	Leptastrea	Leptastrea	spp.	encrusting	Indian	Low	1	6% bleached or pale	Obura et al. 2018
Lobophyllia	Lobophyllia	spp.	Lobophyllia	Lobophyllia	spp.	encrusting	Indian	High	3	~64% bleached or pale	Obura et al. 2018
Montipora	Montipora	spp.	Montipora	Montipora	spp.	encrusting / plating	Indian	High	3	67% bleached or pale	Obura et al. 2018
Pavona	Pavona	spp.	Pavona	Pavona	spp.	massive / encrusting	Indian	Moderate	2	~42% bleached or pale	Obura et al. 2018
Platygyra	Platygyra	spp.	Platygyra	Platygyra	spp.	massive	Indian	Moderate	2	~43% bleached or pale	Obura et al. 2018
Pocillopora	Pocillopora	spp.	Pocillopora	Pocillopora	spp.	branching	Indian	Low	1	32% bleached or pale	Obura et al. 2018
Porites	Porites	spp.	Porites (branching)	Porites	spp.	branching	Indian	Low	1	~14% bleached or pale	Obura et al. 2018
Porites	Porites	spp.	Porites (massive)	Porites	spp.	massive	Indian	Moderate	2	~57% bleached or pale	Obura et al. 2018
Seriatopora	Seriatopora	spp.	Seriatopora	Seriatopora	spp.	branching	Indian	Low	1	~18% bleached or pale	Obura et al. 2018
Agaricia	Agaricia	spp.	Agaricia spp.	Agaricia	spp.	plating	Atlantic	Severe	4	96.60% bleached	Oxenford et al. 2008
Helioseris cucullata	Helioseris	cucullata	Leptoseris cucullata	Leptoseris	cucullata	plating	Atlantic	Severe	4	100% bleached	Oxenford et al. 2008
Stephanocoenia intersepta	Stephanocoenia	intersepta	Stephanocoenia intersepta	Stephanocoenia	intersepta	massive / encrusting	Atlantic	Moderate	2	38.89% bleached	Oxenford et al. 2008
Eusmilia fastigiata	Eusmilia	fastigiata	Eusmilia fastigiata	Eusmilia	fastigiata	massive	Atlantic	Low	1	16.67% bleached	Oxenford et al. 2008
Colpophyllia natans	Colpophyllia	natans	Colpophyllia amaranthus	Colpophyllia	amaranthus	massive / encrusting	Atlantic	Severe	4	100% bleached	Oxenford et al. 2008
Colpophyllia natans	Colpophyllia	natans	Colpophyllia natans	Colpophyllia	natans	massive / encrusting	Atlantic	Low	1	7.94% bleached	Oxenford et al. 2008
Pseudodiploria clivosa	Pseudodiploria	clivosa	Diploria clivosa	Diploria	clivosa	massive / encrusting	Atlantic	Severe	4	80% bleached	Oxenford et al. 2008
Diploria labyrinthiformis	Diploria	labyrinthiformis	Diploria labyrinthiformis	Diploria	labyrinthiformis	massive	Atlantic	Moderate	2	50.67% bleached	Oxenford et al. 2008
Pseudodiploria strigosa	Pseudodiploria	strigosa	Diploria strigosa	Diploria	strigosa	massive / encrusting	Atlantic	Severe	4	81.59% bleached	Oxenford et al. 2008
Favia fragum	Favia	fragum	Favia fragum	Favia	fragum	massive	Atlantic	Severe	4	90.91% bleached	Oxenford et al. 2008
Montastraea cavernosa	Montastraea	cavernosa	Montastrea cavernosa	Montastrea	cavernosa	massive	Atlantic	High	3	63.87% bleached	Oxenford et al. 2008
Orbicella complex	Orbicella	complex	Montastrea complex	Montastrea	spp.	massive	Atlantic	High	3	72.6% bleached	Oxenford et al. 2008
Dendrogyra cylindrus	Dendrogyra	cylindrus	Dendrogyra cylindricus	Dendrogyra	cylindricus	columnar	Atlantic	Severe	4	100% bleached	Oxenford et al. 2008
Dichocoenia stokesii	Dichocoenia	stokesii	Dichocoenia stokesii	Dichocoenia	stokesii	massive	Atlantic	Low	1	30% bleached	Oxenford et al. 2008
Meandrina meandrites	Meandrina	meandrites	Meandrina meandrites	Meandrina	meandrites	massive	Atlantic	Moderate	2	41.30% bleached	Oxenford et al. 2008
Isophyllia rigida	Isophyllia	rigida	Isophyllastrea rigida	Isophyllastrea	rigida	massive	Atlantic	Severe	4	100% bleached	Oxenford et al. 2008
Mussa angulosa	Mussa	angulosa	Mussa angulosa	Mussa	angulosa	massive	Atlantic	Severe	4	100% bleached	Oxenford et al. 2008
Mycetophyllia ferox	Mycetophyllia	ferox	Mycetophyllia ferox	Mycetophyllia	ferox	plating	Atlantic	None	0	0% bleached	Oxenford et al. 2008
Madracis decactis	Madracis	decactis	Madracis decactis	Madracis	decactis	columnar	Atlantic	Low	1	8.47% bleached	Oxenford et al. 2008
Madracis myriaster	Madracis	myriaster	Madracis mirabilis	Madracis	mirabilis	columnar	Atlantic	Low	1	20% bleached	Oxenford et al. 2008
Porites astreoides	Porites	astreoides	Porites astreoides	Porites	astreoides	massive / encrusting	Atlantic	High	3	65.59% bleached	Oxenford et al. 2008
Porites porites	Porites	porites	Porites porites	Porites	porites	branching	Atlantic	Severe	4	72.8% bleached	Oxenford et al. 2008
Siderastrea radians	Siderastrea	radians	Siderastrea radians	Siderastrea	radians	massive / encrusting	Atlantic	Severe	4	70% bleached	Oxenford et al. 2008
Siderastrea siderea	Siderastrea	siderea	Siderastrea siderea	Siderastrea	siderea	massive	Atlantic	High	3	66.04% bleached	Oxenford et al. 2008
Pocillopora damicornis	Pocillopora	damicornis	Pocillopora damicornis	Pocillopora	damicornis	branching	Pacific	Low	1	n/a (qualitative)	Paulay & Benayahu 1999
Acropora	Acropora	spp.	Acropora spp.	Acropora	spp.	table / branching	Pacific	High	3	n/a (qualitative)	Paulay & Benayahu 1999
Montipora digitata	Montipora	digitata	Montipora digitata	Montipora	digitata	columnar	Pacific	Low	1	n/a (qualitative)	Paulay & Benayahu 1999
Astreopora	Astreopora	sp.	Astreopora sp.	Astreopora	sp.	massive / encrusting	Pacific	None	0	n/a (qualitative)	Paulay & Benayahu 1999
Psammocora contigua	Psammocora	contigua	Psammocora contigua	Psammocora	contigua	branching / plating	Pacific	None	0	n/a (qualitative)	Paulay & Benayahu 1999
Pavona varians	Pavona	varians	Pavona varians	Pavona	varians	encrusting	Pacific	Low	1	n/a (qualitative)	Paulay & Benayahu 1999
Pavona divaricata	Pavona	divaricata	Pavona divaricata	Pavona	divaricata	plating	Pacific	Low	1	n/a (qualitative)	Paulay & Benayahu 1999
Pavona decussata	Pavona	decussata	Pavona decussata	Pavona	decussata	plating	Pacific	None	0	n/a (qualitative)	Paulay & Benayahu 1999
Pavona venosa	Pavona	venosa	Pavona venosa	Pavona	venosa	massive / encrusting	Pacific	Low	1	n/a (qualitative)	Paulay & Benayahu 1999
Pavona cactus	Pavona	cactus	Pavona cactus	Pavona	cactus	branching	Pacific	Moderate	2	n/a (qualitative)	Paulay & Benayahu 1999
Ctenactis	Ctenactis	sp.	Ctenactis sp.	Ctenactis	sp.	free-living	Pacific	None	0	n/a (qualitative)	Paulay & Benayahu 1999
Fungia fungites	Fungia	fungites	Fungia fungites	Fungia	fungites	free-living	Pacific	Moderate	2	n/a (qualitative)	Paulay & Benayahu 1999
Porites rus	Porites	rus	Porites rus	Porites	rus	branching / encrusting	Pacific	None	0	n/a (qualitative)	Paulay & Benayahu 1999
Porites	Porites	sp.	Porites (massive)	Porites	sp.	massive	Pacific	None	0	n/a (qualitative)	Paulay & Benayahu 1999
Porites cylindrica	Porites	cylindrica	Porites cylindrica	Porites	cylindrica	branching	Pacific	Low	1	n/a (qualitative)	Paulay & Benayahu 1999
Lobophyllia	Lobophyllia	sp.	Symphyllia sp.	Symphyllia	sp.	encrusting	Pacific	None	0	n/a (qualitative)	Paulay & Benayahu 1999
Lobophyllia hemprichii	Lobophyllia	hemprichii	Lobophyllia hemprichii	Lobophyllia	hemprichii	encrusting	Pacific	High	3	n/a (qualitative)	Paulay & Benayahu 1999
Favia	Favia	sp.	Favia sp.	Favia	sp.	massive	Pacific	None	0	n/a (qualitative)	Paulay & Benayahu 1999
Stylocoeniella armata	Stylocoeniella	armata	Stylocoeniella armata	Stylocoeniella	armata	encrusting	Pacific	Low	1	n/a (qualitative)	Paulay & Benayahu 1999
Pocillopora meandrina / verrucosa	Pocillopora	meandrina / verrucosa	Pocillopora meandrina / verrucosa complex	Pocillopora	meandrina / verrucosa	branching	Pacific	Moderate	2	n/a (qualitative)	Paulay & Benayahu 1999
Seriatopora aculeata	Seriatopora	aculeata	Seriatopora aculeata	Seriatopora	aculeata	branching	Pacific	High	3	n/a (qualitative)	Paulay & Benayahu 1999
Stylophora pistillata	Stylophora	pistillata	Stylophora mordax	Stylophora	mordax	branching	Pacific	Mixed	n/a	n/a (qualitative)	Paulay & Benayahu 1999
Acropora palmerae	Acropora	palmerae	Acropora palmerae	Acropora	palmerae	branching / encrusting	Pacific	None	0	n/a (qualitative)	Paulay & Benayahu 1999
Acropora abrotanoides	Acropora	abrotanoides	Acropora danai	Acropora	danai	branching	Pacific	None	0	n/a (qualitative)	Paulay & Benayahu 1999
Acropora humilis	Acropora	humilis	Acropora humilis	Acropora	humilis	corymbose	Pacific	None	0	n/a (qualitative)	Paulay & Benayahu 1999
Acropora hyacinthus	Acropora	hyacinthus	Acropora surculosa	Acropora	surculosa	table / branching	Pacific	None	0	n/a (qualitative)	Paulay & Benayahu 1999
Isopora palifera	Isopora	palifera	Acropora palifera	Acropora	palifera	columnar	Pacific	Moderate	2	n/a (qualitative)	Paulay & Benayahu 1999
Acropora monticulosa	Acropora	monticulosa	Acropora monticulosa	Acropora	monticulosa	columnar	Pacific	Moderate	2	n/a (qualitative)	Paulay & Benayahu 1999
Acropora valida	Acropora	valida	Acropora valida	Acropora	valida	branching	Pacific	Low	1	n/a (qualitative)	Paulay & Benayahu 1999
Acropora digitifera	Acropora	digitifera	Acropora wardi	Acropora	wardi	branching	Pacific	Low	1	n/a (qualitative)	Paulay & Benayahu 1999
Acropora verweyi	Acropora	verweyi	Acropora verweyii	Acropora	verweyii	branching	Pacific	High	3	n/a (qualitative)	Paulay & Benayahu 1999
Montipora foveolata	Montipora	foveolata	Montipora foveolata	Montipora	foveolata	encrusting	Pacific	High	3	n/a (qualitative)	Paulay & Benayahu 1999
Montipora verrucosa	Montipora	verrucosa	Montipora verrucosa	Montipora	verrucosa	encrusting	Pacific	Low	1	n/a (qualitative)	Paulay & Benayahu 1999
Montipora	Montipora	spp.	Montipora spp.	Montipora	spp.	encrusting / plating	Pacific	High	3	n/a (qualitative)	Paulay & Benayahu 1999
Pachyseris speciosa	Pachyseris	speciosa	Pachyseris speciosa	Pachyseris	speciosa	plating	Pacific	High	3	n/a (qualitative)	Paulay & Benayahu 1999
Pavona frondifera	Pavona	frondifera	Pavona frondifera	Pavona	frondifera	plating	Pacific	Moderate	2	n/a (qualitative)	Paulay & Benayahu 1999
Alveopora	Alveopora	sp.	Alveopora sp.	Alveopora	sp.	massive	Pacific	Moderate	2	n/a (qualitative)	Paulay & Benayahu 1999
Porites	Porites	spp.	Porites (massive)	Porites	spp.	massive	Pacific	Low	1	n/a (qualitative)	Paulay & Benayahu 1999
Porites cylindrica	Porites	cylindrica	Porites cylindrica	Porites	cylindrica	branching	Pacific	Moderate	2	n/a (qualitative)	Paulay & Benayahu 1999
Lobophyllia hemprichii	Lobophyllia	hemprichii	Lobophyllia hemprichii	Lobophyllia	hemprichii	encrusting	Pacific	Low	1	n/a (qualitative)	Paulay & Benayahu 1999
Lobophyllia corymbosa	Lobophyllia	corymbosa	Lobophyllia corymbosa	Lobophyllia	corymbosa	encrusting	Pacific	Low	1	n/a (qualitative)	Paulay & Benayahu 1999
Dipsastraea matthaii	Dipsastraea	matthaii	Favia matthaii	Favia	matthaii	massive	Pacific	Low	1	n/a (qualitative)	Paulay & Benayahu 1999
Goniastrea stelligera	Goniastrea	stelligera	Favia stelligera	Favia	stelligera	massive	Pacific	Mixed	n/a	n/a (qualitative)	Paulay & Benayahu 1999
Favites abdita	Favites	abdita	Favites abdita	Favites	abdita	massive	Pacific	Low	1	n/a (qualitative)	Paulay & Benayahu 1999
Goniastrea edwardsi	Goniastrea	edwardsi	Goniastrea edwardsi	Goniastrea	edwardsi	massive	Pacific	High	3	n/a (qualitative)	Paulay & Benayahu 1999
Goniastrea retiformis	Goniastrea	retiformis	Goniastrea retiformis	Goniastrea	retiformis	massive	Pacific	Low	1	n/a (qualitative)	Paulay & Benayahu 1999
Leptoria phrygia	Leptoria	phrygia	Leptoria phrygia	Leptoria	phrygia	encrusting	Pacific	Low	1	n/a (qualitative)	Paulay & Benayahu 1999
Astrea curta	Astrea	curta	Montastraea curta	Montastraea	curta	massive	Pacific	High	3	n/a (qualitative)	Paulay & Benayahu 1999
Fungia fungites	Fungia	fungites	Fungia fungites	Fungia	fungites	free-living	Pacific	Low	1	0 Bleached Index	Pengsakun et al. 2019
Galaxea fascicularis	Galaxea	fascicularis	Galaxea fascicularis	Galaxea	fascicularis	massive	Pacific	Low	1	0 Bleached Index	Pengsakun et al. 2019
Oulastrea crispata	Oulastrea	crispata	Oulastrea crispata	Oulastrea	crispata	encrusting	Pacific	Low	1	0 Bleached Index	Pengsakun et al. 2019
Lobophyllia recta	Lobophyllia	recta	Symphyllia recta	Symphyllia	recta	encrusting	Pacific	Low	1	0 Bleached Index	Pengsakun et al. 2019
Pavona frondifera	Pavona	frondifera	Pavona frondifera	Pavona	frondifera	plating	Pacific	Low	1	0 Bleached Index	Pengsakun et al. 2019
Favites abdita	Favites	abdita	Favites abdita	Favites	abdita	massive	Pacific	Moderate	2	>20 Bleaching Index	Pengsakun et al. 2019
Montipora turtlensis	Montipora	turtlensis	Montipora turtlensis	Montipora	turtlensis	encrusting / plating	Pacific	Moderate	2	>20 Bleaching Index	Pengsakun et al. 2019
Podabacia crustacea	Podabacia	crustacea	Podabacia crustacea	Podabacia	crustacea	encrusting	Pacific	Moderate	2	>20 Bleaching Index	Pengsakun et al. 2019
Platygyra daedalea	Platygyra	daedalea	Platygyra daedalea	Platygyra	daedalea	massive	Pacific	Moderate	2	>20 Bleaching Index	Pengsakun et al. 2019
Platygyra sinensis	Platygyra	sinensis	Platygyra sinensis	Platygyra	sinensis	massive	Pacific	Moderate	2	>20 Bleaching Index	Pengsakun et al. 2019
Dipsastraea favus	Dipsastraea	favus	Favia favus	Favia	favus	massive / columnar	Pacific	Moderate	2	>20 Bleaching Index	Pengsakun et al. 2019
Goniopora columna	Goniopora	columna	Goniopora columna	Goniopora	columna	massive	Pacific	Moderate	2	>20 Bleaching Index	Pengsakun et al. 2019
Platygyra pini	Platygyra	pini	Platygyra pini	Platygyra	pini	massive	Pacific	Moderate	2	>20 Bleaching Index	Pengsakun et al. 2019
Porites lutea	Porites	lutea	Porites lutea	Porites	lutea	massive	Pacific	Moderate	2	>20 Bleaching Index	Pengsakun et al. 2019
Lobophyllia agaricia	Lobophyllia	agaricia	Symphyllia agaricia	Symphyllia	agaricia	massive	Pacific	Moderate	2	>20 Bleaching Index	Pengsakun et al. 2019
Acropora millepora	Acropora	millepora	Acropora millepora	Acropora	millepora	branching	Pacific	High	3	>80 Bleaching Index	Pengsakun et al. 2019
Pavona decussata	Pavona	decussata	Pavona decussata	Pavona	decussata	plating	Pacific	High	3	>80 Bleaching Index	Pengsakun et al. 2019
Pocillopora damicornis	Pocillopora	damicornis	Pocillopora damicornis	Pocillopora	damicornis	branching	Pacific	High	3	>80 Bleaching Index	Pengsakun et al. 2019
Montipora	Montipora	sp.	Montipora	Montipora	sp.	encrusting / plating	Indian	Low	1	28 Bleaching Index	Porter et al. 2021
Paramontastraea	Paramontastraea	sp.	Paramontastraea	Paramontastraea	sp.	massive	Indian	Low	1	21 Bleaching Index	Porter et al. 2021
Goniastrea	Goniastrea	sp.	Goniastrea	Goniastrea	sp.	massive	Indian	Low	1	12 Bleaching Index	Porter et al. 2021
Echinophyllia	Echinophyllia	sp.	Echinophyllia	Echinophyllia	sp.	plating	Indian	Low	1	12 Bleaching Index	Porter et al. 2021
Favia	Favia	sp.	Favia	Favia	sp.	massive	Indian	Low	1	12 Bleaching Index	Porter et al. 2021
Turbinaria	Turbinaria	sp.	Turbinaria	Turbinaria	sp.	plating	Indian	Low	1	10 Bleaching Index	Porter et al. 2021
Pocillopora	Pocillopora	sp.	Pocillopora	Pocillopora	sp.	branching	Indian	Low	1	10 Bleaching Index	Porter et al. 2021
Porites	Porites	sp.	Porites	Porites	sp.	branching / massive	Indian	Low	1	9 Bleaching Index	Porter et al. 2021
Coscinaraea	Coscinaraea	sp.	Coscinaraea	Coscinaraea	sp.	encrusting / plating	Indian	Low	1	8 Bleaching Index	Porter et al. 2021
Hydnophora	Hydnophora	sp.	Hydnophora	Hydnophora	sp.	massive	Indian	Low	1	8 Bleaching Index	Porter et al. 2021
Platygyra	Platygyra	sp.	Platygyra	Platygyra	sp.	massive	Indian	Low	1	8 Bleaching Index	Porter et al. 2021
Acropora	Acropora	sp.	Acropora	Acropora	sp.	branching	Indian	Low	1	8 Bleaching Index	Porter et al. 2021
Favites	Favites	sp.	Favites	Favites	sp.	massive	Indian	Low	1	7 Bleaching Index	Porter et al. 2021
Echinopora	Echinopora	sp.	Echinopora	Echinopora	sp.	plating	Indian	Low	1	7 Bleaching Index	Porter et al. 2021
Alveopora	Alveopora	sp.	Alveopora	Alveopora	sp.	massive	Indian	Low	1	6 Bleaching Index	Porter et al. 2021
Lobophyllia	Lobophyllia	sp.	Symphyllia	Symphyllia	sp.	encrusting	Indian	Low	1	6 Bleaching Index	Porter et al. 2021
Goniopora	Goniopora	sp.	Goniopora	Goniopora	sp.	massive	Indian	Low	1	5 Bleaching Index	Porter et al. 2021
Oulophyllia	Oulophyllia	sp.	Oulophyllia	Oulophyllia	sp.	massive	Indian	Low	1	5 Bleaching Index	Porter et al. 2021
Astreopora	Astreopora	sp.	Astreopora	Astreopora	sp.	massive / encrusting	Indian	Low	1	5 Bleaching Index	Porter et al. 2021
Galaxea	Galaxea	sp.	Galaxea	Galaxea	sp.	massive	Indian	Low	1	3 Bleaching Index	Porter et al. 2021
Acanthastrea	Acanthastrea	sp.	Acanthastrea	Acanthastrea	sp.	encrusting	Indian	Low	1	3 Bleaching Index	Porter et al. 2021
Gardineroseris	Gardineroseris	sp.	Gardineroseris	Gardineroseris	sp.	massive	Indian	Low	1	2 Bleaching Index	Porter et al. 2021
Gyrosmilia	Gyrosmilia	sp.	Gyrosmilia	Gyrosmilia	sp.	massive	Indian	Low	1	2 Bleaching Index	Porter et al. 2021
Seriatopora	Seriatopora	sp.	Seriatopora	Seriatopora	sp.	branching	Indian	Low	1	2 Bleaching Index	Porter et al. 2021
Pavona	Pavona	sp.	Pavona	Pavona	sp.	massive / encrusting	Indian	Low	1	1 Bleaching Index	Porter et al. 2021
Blastomussa	Blastomussa	sp.	Blastomussa	Blastomussa	sp.	encrusting	Indian	None	0	0 Bleaching Index	Porter et al. 2021
Fungia	Fungia	sp.	Fungia	Fungia	sp.	free-living	Indian	None	0	0 Bleaching Index	Porter et al. 2021
Oxypora	Oxypora	sp.	Oxypora	Oxypora	sp.	plating	Indian	None	0	0 Bleaching Index	Porter et al. 2021
Pachyseris	Pachyseris	sp.	Pachyseris	Pachyseris	sp.	plating	Indian	None	0	0 Bleaching Index	Porter et al. 2021
Dipsastraea	Dipsastraea	sp.	Dipsastraea	Dipsastraea	sp.	massive	Pacific	Moderate	2	42.86% bleaching prevalence	Quimpo et al. 2020
Porites	Porites	sp.	Porites	Porites	sp.	branching / massive	Pacific	Low	1	27.45% bleaching prevalence	Quimpo et al. 2020
Fungia	Fungia	sp.	Fungia	Fungia	sp.	free-living	Pacific	High	3	71.31% bleaching prevalence	Quimpo et al. 2020
Seriatopora	Seriatopora	sp.	Seriatopora	Seriatopora	sp.	branching	Pacific	Low	1	22.28% bleaching prevalence	Quimpo et al. 2020
Montipora	Montipora	sp.	Montipora	Montipora	sp.	encrusting / plating	Pacific	Low	1	19.71% bleaching prevalence	Quimpo et al. 2020
Pavona	Pavona	sp.	Pavona	Pavona	sp.	massive / encrusting	Pacific	Moderate	2	59.62% bleaching prevalence	Quimpo et al. 2020
Galaxea	Galaxea	sp.	Galaxea	Galaxea	sp.	massive	Pacific	Low	1	10.2% bleaching prevalence	Quimpo et al. 2020
Acropora	Acropora	sp.	Acropora	Acropora	sp.	branching	Pacific	Low	1	16.22% bleaching prevalence	Quimpo et al. 2020
Cyphastrea	Cyphastrea	sp.	Cyphastrea	Cyphastrea	sp.	massive	Pacific	Moderate	2	42.11% bleaching prevalence	Quimpo et al. 2020
Pocillopora	Pocillopora	sp.	Pocillopora	Pocillopora	sp.	branching	Pacific	Low	1	29.33% bleaching prevalence	Quimpo et al. 2020
Platygyra	Platygyra	sp.	Platygyra	Platygyra	sp.	massive	Pacific	Moderate	2	55.26% bleaching prevalence	Quimpo et al. 2020
Goniastrea	Goniastrea	sp.	Goniastrea	Goniastrea	sp.	massive	Pacific	Moderate	2	53.13% bleaching prevalence	Quimpo et al. 2020
Lobophyllia	Lobophyllia	sp.	Lobophyllia	Lobophyllia	sp.	encrusting	Pacific	Low	1	38.1% bleaching prevalence	Quimpo et al. 2020
Pectinia	Pectinia	sp.	Pectinia	Pectinia	sp.	branching / plating	Pacific	Moderate	2	64.71% bleaching prevalence	Quimpo et al. 2020
Turbinaria	Turbinaria	sp.	Turbinaria	Turbinaria	sp.	plating	Pacific	Low	1	27.27% bleaching prevalence	Quimpo et al. 2020
Merulina	Merulina	sp.	Merulina	Merulina	sp.	plating	Pacific	Low	1	14.71% bleaching prevalence	Quimpo et al. 2020
Leptastrea	Leptastrea	sp.	Leptastrea	Leptastrea	sp.	encrusting	Pacific	Low	1	18.52% bleaching prevalence	Quimpo et al. 2020
Echinophyllia	Echinophyllia	sp.	Echinophyllia	Echinophyllia	sp.	plating	Pacific	Low	1	38.46% bleaching prevalence	Quimpo et al. 2020
Goniopora	Goniopora	sp.	Goniopora	Goniopora	sp.	massive	Pacific	Low	1	3.17% bleaching prevalence	Quimpo et al. 2020
Hydnophora	Hydnophora	sp.	Hydnophora	Hydnophora	sp.	massive	Pacific	High	3	75% bleaching prevalence	Quimpo et al. 2020
Alveopora	Alveopora	sp.	Alveopora	Alveopora	sp.	massive	Pacific	Low	1	15.38% bleaching prevalence	Quimpo et al. 2020
Lobophyllia	Lobophyllia	sp.	Symphyllia	Symphyllia	sp.	encrusting	Pacific	High	3	66.67% bleaching prevalence	Quimpo et al. 2020
Psammocora	Psammocora	sp.	Psammocora	Psammocora	sp.	encrusting	Pacific	Severe	4	100% bleaching prevalence	Quimpo et al. 2020
Ctenactis	Ctenactis	sp.	Ctenactis	Ctenactis	sp.	free-living	Pacific	None	0	0% bleaching prevalence	Quimpo et al. 2020
Pachyseris	Pachyseris	sp.	Pachyseris	Pachyseris	sp.	plating	Pacific	None	0	0% bleaching prevalence	Quimpo et al. 2020
Acropora abrotanoides	Acropora	abrotanoides	Acropora abrotanoides	Acropora	abrotanoides	branching	Pacific	Low	1	8 ± 16% bleaching prevalence	Raymundo et al. 2019
Acropora austera	Acropora	austera	Acropora austera	Acropora	austera	branching	Pacific	Low	1	13 ± 23% bleaching prevalence	Raymundo et al. 2019
Acropora nana	Acropora	nana	Acropora cf. azurea	Acropora	azurea	branching	Pacific	Low	1	12 ± 25% bleaching prevalence	Raymundo et al. 2019
Acropora cerealis	Acropora	cerealis	Acropora cerealis	Acropora	cerealis	branching	Pacific	Low	1	25 ± 37% bleaching prevalence	Raymundo et al. 2019
Acropora cophodactyla	Acropora	cophodactyla	Acropora cophodactyla	Acropora	cophodactyla	branching	Pacific	None	0	0% bleaching prevalence	Raymundo et al. 2019
Acropora digitifera	Acropora	digitifera	Acropora digitifera	Acropora	digitifera	corymbose	Pacific	Low	1	25 ± 43% bleaching prevalence	Raymundo et al. 2019
Acropora globiceps	Acropora	globiceps	Acropora globiceps	Acropora	globiceps	corymbose	Pacific	Low	1	21 ± 29% bleaching prevalence	Raymundo et al. 2019
Acropora humilis	Acropora	humilis	Acropora humilis	Acropora	humilis	corymbose	Pacific	Low	1	15 ± 19% bleaching prevalence	Raymundo et al. 2019
Acropora intermedia	Acropora	intermedia	Acropora cf. intermedia	Acropora	intermedia	branching	Pacific	Low	1	18 ± 36% bleaching prevalence	Raymundo et al. 2019
Acropora latistella	Acropora	latistella	Acropora latistella	Acropora	latistella	branching	Pacific	Low	1	15 ± 38% bleaching prevalence	Raymundo et al. 2019
Acropora monticulosa	Acropora	monticulosa	Acropora monticulosa	Acropora	monticulosa	columnar	Pacific	Low	1	8 ± 28% bleaching prevalence	Raymundo et al. 2019
Acropora muricata	Acropora	muricata	Acropora muricata	Acropora	muricata	branching	Pacific	Severe	4	84 ± 0% bleaching prevalence	Raymundo et al. 2019
Acropora nasuta	Acropora	nasuta	Acropora cf. nasuta	Acropora	nasuta	corymbose	Pacific	Low	1	10 ± 29% bleaching prevalence	Raymundo et al. 2019
Acropora pulchra	Acropora	pulchra	Acropora cf. pulchra	Acropora	pulchra	branching	Pacific	High	3	60 ± 35% bleaching prevalence	Raymundo et al. 2019
Acropora secale	Acropora	secale	Acropora secale	Acropora	secale	branching	Pacific	Low	1	12 ± 23% bleaching prevalence	Raymundo et al. 2019
Acropora hyacinthus	Acropora	hyacinthus	Acropora surculosa	Acropora	surculosa	corymbose	Pacific	Moderate	2	51 ± 34% bleaching prevalence	Raymundo et al. 2019
Acropora tenuis	Acropora	tenuis	Acropora tenuis	Acropora	tenuis	branching	Pacific	Low	1	15 ± 32% bleaching prevalence	Raymundo et al. 2019
Acropora valida	Acropora	valida	Acropora valida	Acropora	valida	branching	Pacific	Low	1	23 ± 35% bleaching prevalence	Raymundo et al. 2019
Acropora verweyi	Acropora	verweyi	Acropora verweyii	Acropora	verweyii	branching	Pacific	Low	1	7 ± 14% bleaching prevalence	Raymundo et al. 2019
Acropora	Acropora	spp.	Acropora spp. (caespitose)	Acropora	spp.	table / branching	Pacific	Low	1	23 ± 33% bleaching prevalence	Raymundo et al. 2019
Acropora	Acropora	spp.	Acropora spp. (corymbose)	Acropora	spp.	corymbose	Pacific	Low	1	4 ± 7% bleaching prevalence	Raymundo et al. 2019
Astrea curta	Astrea	curta	Astrea curta	Astrea	curta	massive	Pacific	Moderate	2	45 ± 40% bleaching prevalence	Raymundo et al. 2019
Astreopora myriophthalma	Astreopora	myriophthalma	Astreopora elliptica	Astreopora	elliptica	massive / encrusting	Pacific	Low	1	13 ± 32% bleaching prevalence	Raymundo et al. 2019
Astreopora gracilis	Astreopora	gracilis	Astreopora gracilis	Astreopora	gracilis	massive / encrusting	Pacific	Low	1	8 ± 28% bleaching prevalence	Raymundo et al. 2019
Astreopora listeri	Astreopora	listeri	Astreopora listeri	Astreopora	listeri	massive / encrusting	Pacific	Low	1	26 ± 43% bleaching prevalence	Raymundo et al. 2019
Astreopora myriophthalma	Astreopora	myriophthalma	Astreopora myriopthalma	Astreopora	myriopthalma	massive / encrusting	Pacific	Low	1	35 ± 25% bleaching prevalence	Raymundo et al. 2019
Astreopora ocellata	Astreopora	ocellata	Astreopora ocellata	Astreopora	ocellata	massive / encrusting	Pacific	Low	1	13 ± 32% bleaching prevalence	Raymundo et al. 2019
Astreopora randalli	Astreopora	randalli	Astreopora randalli	Astreopora	randalli	encrusting / plating	Pacific	Low	1	33 ± 43% bleaching prevalence	Raymundo et al. 2019
Astreopora	Astreopora	spp.	Astreopora spp.	Astreopora	spp.	massive / encrusting	Pacific	Low	1	36 ± 40% bleaching prevalence	Raymundo et al. 2019
Coscinaraea columna	Coscinaraea	columna	Coscinaraea columna	Coscinaraea	columna	massive / encrusting	Pacific	Moderate	2	39 ± 51% bleaching prevalence	Raymundo et al. 2019
Cycloseris	Cycloseris	sp.	Cycloseris sp.	Cycloseris	sp.	free-living	Pacific	Low	1	8 ± 28% bleaching prevalence	Raymundo et al. 2019
Cyphastrea chalcidicum	Cyphastrea	chalcidicum	Cyphastrea chalcidicum	Cyphastrea	chalcidicum	massive / encrusting	Pacific	Low	1	20 ± 31% bleaching prevalence	Raymundo et al. 2019
Cyphastrea serailia	Cyphastrea	serailia	Cyphastrea serailia	Cyphastrea	serailia	massive / encrusting	Pacific	Low	1	19 ± 31% bleaching prevalence	Raymundo et al. 2019
Cyphastrea	Cyphastrea	spp.	Cyphastrea spp.	Cyphastrea	spp.	massive / encrusting	Pacific	Low	1	13 ± 22% bleaching prevalence	Raymundo et al. 2019
Diploastrea heliopora	Diploastrea	heliopora	Diploastrea heliopora	Diploastrea	heliopora	massive	Pacific	Low	1	8 ± 13% bleaching prevalence	Raymundo et al. 2019
Dipsastraea danai	Dipsastraea	danai	Dipsastraea danae	Dipsastraea	danae	massive	Pacific	Low	1	23 ± 37% bleaching prevalence	Raymundo et al. 2019
Dipsastraea favus	Dipsastraea	favus	Dipsastraea favus	Dipsastraea	favus	massive	Pacific	High	3	70 ± 30% bleaching prevalence	Raymundo et al. 2019
Dipsastraea helianthoides	Dipsastraea	helianthoides	Dipsastraea helianthoides	Dipsastraea	helianthoides	massive	Pacific	Low	1	25 ± 39% bleaching prevalence	Raymundo et al. 2019
Dipsastraea matthaii	Dipsastraea	matthaii	Dipsastraea matthaii	Dipsastraea	matthaii	massive	Pacific	None	0	0% bleaching prevalence	Raymundo et al. 2019
Dipsastraea pallida	Dipsastraea	pallida	Dipsastraea pallida	Dipsastraea	pallida	massive	Pacific	High	3	63 ± 46% bleaching prevalence	Raymundo et al. 2019
Dipsastraea	Dipsastraea	spp.	Dipsastraea spp.	Dipsastraea	spp.	massive	Pacific	Low	1	20 ± 38% bleaching prevalence	Raymundo et al. 2019
Oxypora echinata	Oxypora	echinata	Echinophyllia echinata	Echinophyllia	echinata	plating	Pacific	Low	1	8 ± 28% bleaching prevalence	Raymundo et al. 2019
Echinopora pacifica	Echinopora	pacifica	Echinopora pacificus	Echinopora	pacificus	plating	Pacific	Low	1	27 ± 44% bleaching prevalence	Raymundo et al. 2019
Favites flexuosa	Favites	flexuosa	Favites flexuosa	Favites	flexuosa	massive	Pacific	Moderate	2	37 ± 47% bleaching prevalence	Raymundo et al. 2019
Favites rotundata	Favites	rotundata	Favites rotundata	Favites	rotundata	massive	Pacific	Low	1	3 ± 11% bleaching prevalence	Raymundo et al. 2019
Paragoniastrea russelli	Paragoniastrea	russelli	Favites russelli	Favites	russelli	massive	Pacific	Moderate	2	47 ± 41% bleaching prevalence	Raymundo et al. 2019
Favites	Favites	spp.	Favites spp.	Favites	spp.	massive	Pacific	Low	1	20 ± 38% bleaching prevalence	Raymundo et al. 2019
Fungia fungites	Fungia	fungites	Fungia fungites	Fungia	fungites	free-living	Pacific	Low	1	10 ± 29% bleaching prevalence	Raymundo et al. 2019
Pleuractis granulosa	Pleuractis	granulosa	Fungia granulosa	Fungia	granulosa	free-living	Pacific	None	0	0% bleaching prevalence	Raymundo et al. 2019
Pleuractis paumotensis	Pleuractis	paumotensis	Fungia paumotensis	Fungia	paumotensis	free-living	Pacific	Low	1	8 ± 28% bleaching prevalence	Raymundo et al. 2019
Lobactis scutaria	Lobactis	scutaria	Fungia scutaria	Fungia	scutaria	free-living	Pacific	Low	1	12 ± 30% bleaching prevalence	Raymundo et al. 2019
Galaxea fascicularis	Galaxea	fascicularis	Galaxea fascicularis	Galaxea	fascicularis	massive	Pacific	Low	1	9 ± 13% bleaching prevalence	Raymundo et al. 2019
Gardineroseris planulata	Gardineroseris	planulata	Gardineroseris planulata	Gardineroseris	planulata	massive	Pacific	Moderate	2	54 ± 52% bleaching prevalence	Raymundo et al. 2019
Goniastrea edwardsi	Goniastrea	edwardsi	Goniastrea edwardsi	Goniastrea	edwardsi	massive	Pacific	Moderate	2	56 ± 31% bleaching prevalence	Raymundo et al. 2019
Goniastrea edwardsi	Goniastrea	edwardsi	Goniastrea edwardsi	Goniastrea	edwardsi	massive	Pacific	Low	1	33 ± 0% bleaching prevalence	Raymundo et al. 2019
Goniastrea minuta	Goniastrea	minuta	Goniastrea minuta	Goniastrea	minuta	massive	Pacific	None	0	0% bleaching prevalence	Raymundo et al. 2019
Goniastrea pectinata	Goniastrea	pectinata	Goniastrea pectinata	Goniastrea	pectinata	massive	Pacific	Moderate	2	43 ± 48% bleaching prevalence	Raymundo et al. 2019
Goniastrea retiformis	Goniastrea	retiformis	Goniastrea retiformis	Goniastrea	retiformis	massive	Pacific	Moderate	2	50 ± 28% bleaching prevalence	Raymundo et al. 2019
Goniastrea retiformis	Goniastrea	retiformis	Goniastrea retiformis	Goniastrea	retiformis	massive	Pacific	High	3	57 ± 49% bleaching prevalence	Raymundo et al. 2019
Goniastrea stelligera	Goniastrea	stelligera	Goniastrea stelligera	Goniastrea	stelligera	massive	Pacific	Low	1	35 ± 33% bleaching prevalence	Raymundo et al. 2019
Goniopora fruticosa	Goniopora	fruticosa	Goniopora fruticosa	Goniopora	fruticosa	massive	Pacific	None	0	1 ± 4% bleaching prevalence	Raymundo et al. 2019
Goniopora pedunculata	Goniopora	pedunculata	Goniopora minor	Goniopora	minor	massive	Pacific	None	0	0% bleaching prevalence	Raymundo et al. 2019
Goniopora somaliensis	Goniopora	somaliensis	Goniopora somaliensis	Goniopora	somaliensis	massive	Pacific	Low	1	8 ± 28% bleaching prevalence	Raymundo et al. 2019
Goniopora tenuidens	Goniopora	tenuidens	Goniopora tenuidens	Goniopora	tenuidens	massive	Pacific	None	0	0% bleaching prevalence	Raymundo et al. 2019
Goniopora	Goniopora	spp.	Goniopora spp.	Goniopora	spp.	massive	Pacific	Low	1	8 ± 20% bleaching prevalence	Raymundo et al. 2019
Herpolitha limax	Herpolitha	limax	Herpolitha limax	Herpolitha	limax	free-living	Pacific	Low	1	31 ± 48% bleaching prevalence	Raymundo et al. 2019
Hydnophora microconos	Hydnophora	microconos	Hydnophora microconos	Hydnophora	microconos	massive	Pacific	High	3	66 ± 41% bleaching prevalence	Raymundo et al. 2019
Isopora palifera	Isopora	palifera	Isopora palifera	Isopora	palifera	columnar	Pacific	None	0	1 ± 4% bleaching prevalence	Raymundo et al. 2019
Isopora palifera	Isopora	palifera	Isopora palifera	Isopora	palifera	columnar	Pacific	Moderate	2	55 ± 0% bleaching prevalence	Raymundo et al. 2019
Leptastrea pruinosa	Leptastrea	pruinosa	Leptastrea pruinosa	Leptastrea	pruinosa	encrusting	Pacific	None	0	0% bleaching prevalence	Raymundo et al. 2019
Leptastrea purpurea	Leptastrea	purpurea	Leptastrea purpurea	Leptastrea	purpurea	encrusting	Pacific	Low	1	13 ± 15% bleaching prevalence	Raymundo et al. 2019
Leptastrea purpurea	Leptastrea	purpurea	Leptastrea purpurea	Leptastrea	purpurea	encrusting	Pacific	Low	1	15 ± 18% bleaching prevalence	Raymundo et al. 2019
Leptastrea	Leptastrea	spp.	Leptastrea spp.	Leptastrea	spp.	encrusting	Pacific	Low	1	7 ± 18% bleaching prevalence	Raymundo et al. 2019
Leptastrea transversa	Leptastrea	transversa	Leptastrea transversa	Leptastrea	transversa	encrusting	Pacific	Low	1	22 ± 38% bleaching prevalence	Raymundo et al. 2019
Leptoria phrygia	Leptoria	phrygia	Leptoria phrygia	Leptoria	phrygia	encrusting	Pacific	Severe	4	74 ± 27% bleaching prevalence	Raymundo et al. 2019
Lobophyllia hemprichii	Lobophyllia	hemprichii	Lobophyllia hemprichii	Lobophyllia	hemprichii	encrusting	Pacific	Severe	4	77 ± 44% bleaching prevalence	Raymundo et al. 2019
Merulina ampliata	Merulina	ampliata	Merulina ampliata	Merulina	ampliata	plating	Pacific	Low	1	19 ± 38% bleaching prevalence	Raymundo et al. 2019
Montipora caliculata	Montipora	caliculata	Montipora caliculata	Montipora	caliculata	encrusting	Pacific	Low	1	23 ± 44% bleaching prevalence	Raymundo et al. 2019
Montipora danae	Montipora	danae	Montipora danae	Montipora	danae	encrusting	Pacific	Low	1	8 ± 28% bleaching prevalence	Raymundo et al. 2019
Montipora foveolata	Montipora	foveolata	Montipora foveolata	Montipora	foveolata	encrusting	Pacific	Low	1	35 ± 42% bleaching prevalence	Raymundo et al. 2019
Montipora grisea	Montipora	grisea	Montipora grisea	Montipora	grisea	encrusting	Pacific	None	0	0% bleaching prevalence	Raymundo et al. 2019
Montipora hoffmeisteri	Montipora	hoffmeisteri	Montipora hoffmeisteri	Montipora	hoffmeisteri	encrusting	Pacific	Low	1	36 ± 40% bleaching prevalence	Raymundo et al. 2019
Montipora informis	Montipora	informis	Montipora informis	Montipora	informis	encrusting	Pacific	Low	1	3 ± 9% bleaching prevalence	Raymundo et al. 2019
Montipora monasteriata	Montipora	monasteriata	Montipora monasteriata	Montipora	monasteriata	encrusting / plating	Pacific	Low	1	4 ± 14% bleaching prevalence	Raymundo et al. 2019
Montipora verrucosa	Montipora	verrucosa	Montipora planiuscula	Montipora	planiuscula	encrusting	Pacific	None	0	0% bleaching prevalence	Raymundo et al. 2019
Montipora tuberculosa	Montipora	tuberculosa	Montipora tuberculosa	Montipora	tuberculosa	encrusting	Pacific	Low	1	8 ± 19% bleaching prevalence	Raymundo et al. 2019
Montipora verrucosa	Montipora	verrucosa	Montipora verrucosa	Montipora	verrucosa	encrusting	Pacific	Moderate	2	42 ± 36% bleaching prevalence	Raymundo et al. 2019
Montipora	Montipora	spp.	Montipora spp.	Montipora	spp.	encrusting / plating	Pacific	Moderate	2	51 ± 33% bleaching prevalence	Raymundo et al. 2019
Oulophyllia crispa	Oulophyllia	crispa	Oulophyllia crispa	Oulophyllia	crispa	encrusting	Pacific	High	3	68 ± 47% bleaching prevalence	Raymundo et al. 2019
Pachyseris speciosa	Pachyseris	speciosa	Pachyseris speciosa	Pachyseris	speciosa	plating	Pacific	Low	1	15 ± 37% bleaching prevalence	Raymundo et al. 2019
Pavona bipartita	Pavona	bipartita	Pavona bipartita	Pavona	bipartita	massive / encrusting	Pacific	Low	1	8 ± 19% bleaching prevalence	Raymundo et al. 2019
Pavona chiriquiensis	Pavona	chiriquiensis	Pavona chiriquiensis	Pavona	chiriquiensis	encrusting	Pacific	Low	1	24 ± 30% bleaching prevalence	Raymundo et al. 2019
Pavona decussata	Pavona	decussata	Pavona decussata	Pavona	decussata	plating	Pacific	Low	1	6 ± 8% bleaching prevalence	Raymundo et al. 2019
Pavona diffluens	Pavona	diffluens	Pavona cf. diffluens	Pavona	diffluens	encrusting	Pacific	Low	1	8 ± 28% bleaching prevalence	Raymundo et al. 2019
Pavona divaricata	Pavona	divaricata	Pavona divaricata	Pavona	divaricata	plating	Pacific	High	3	63 ± 52% bleaching prevalence	Raymundo et al. 2019
Pavona duerdeni	Pavona	duerdeni	Pavona duerdeni	Pavona	duerdeni	massive	Pacific	High	3	66 ± 46% bleaching prevalence	Raymundo et al. 2019
Pavona maldivensis	Pavona	maldivensis	Pavona maldivensis	Pavona	maldivensis	columnar	Pacific	Low	1	21 ± 38% bleaching prevalence	Raymundo et al. 2019
Pavona	Pavona	spp.	Pavona spp.	Pavona	spp.	massive / encrusting	Pacific	None	0	0% bleaching prevalence	Raymundo et al. 2019
Pavona varians	Pavona	varians	Pavona varians	Pavona	varians	encrusting	Pacific	Low	1	28 ± 32% bleaching prevalence	Raymundo et al. 2019
Pavona venosa	Pavona	venosa	Pavona venosa	Pavona	venosa	massive / encrusting	Pacific	Low	1	4 ± 14% bleaching prevalence	Raymundo et al. 2019
Pavona venosa	Pavona	venosa	Pavona venosa	Pavona	venosa	massive / encrusting	Pacific	None	0	0% bleaching prevalence	Raymundo et al. 2019
Platygyra daedalea	Platygyra	daedalea	Platygyra daedalea	Platygyra	daedalea	massive	Pacific	Moderate	2	55 ± 35% bleaching prevalence	Raymundo et al. 2019
Platygyra pini	Platygyra	pini	Platygyra pini	Platygyra	pini	massive	Pacific	Moderate	2	39 ± 56% bleaching prevalence	Raymundo et al. 2019
Plesiastrea versipora	Plesiastrea	versipora	Plesiastrea versipora	Plesiastrea	versipora	encrusting	Pacific	Low	1	8 ± 28% bleaching prevalence	Raymundo et al. 2019
Pocillopora ankeli	Pocillopora	ankeli	Pocillopora ankeli	Pocillopora	ankeli	branching	Pacific	Moderate	2	38 ± 45% bleaching prevalence	Raymundo et al. 2019
Pocillopora ankeli	Pocillopora	ankeli	Pocillopora ankeli	Pocillopora	ankeli	branching	Pacific	Low	1	13 ± 0% bleaching prevalence	Raymundo et al. 2019
Pocillopora damicornis	Pocillopora	damicornis	Pocillopora damicornis	Pocillopora	damicornis	branching	Pacific	Low	1	8 ± 28% bleaching prevalence	Raymundo et al. 2019
Pocillopora damicornis	Pocillopora	damicornis	Pocillopora damicornis	Pocillopora	damicornis	branching	Pacific	High	3	60 ± 24% bleaching prevalence	Raymundo et al. 2019
Pocillopora verrucosa	Pocillopora	verrucosa	Pocillopora danae	Pocillopora	danae	branching	Pacific	Low	1	8 ± 28% bleaching prevalence	Raymundo et al. 2019
Pocillopora elegans	Pocillopora	elegans	Pocillopora elegans	Pocillopora	elegans	branching	Pacific	Low	1	29 ± 43% bleaching prevalence	Raymundo et al. 2019
Pocillopora grandis	Pocillopora	grandis	Pocillopora grandis	Pocillopora	grandis	branching	Pacific	Moderate	2	41 ± 48% bleaching prevalence	Raymundo et al. 2019
Pocillopora ligulata	Pocillopora	ligulata	Pocillopora cf. ligulata	Pocillopora	ligulata	branching	Pacific	Moderate	2	41 ± 48% bleaching prevalence	Raymundo et al. 2019
Pocillopora meandrina	Pocillopora	meandrina	Pocillopora meandrina	Pocillopora	meandrina	branching	Pacific	Low	1	31 ± 25% bleaching prevalence	Raymundo et al. 2019
Pocillopora brevicornis	Pocillopora	brevicornis	Pocillopora setchelli	Pocillopora	setchelli	branching	Pacific	None	0	1 ± 4% bleaching prevalence	Raymundo et al. 2019
Pocillopora verrucosa	Pocillopora	verrucosa	Pocillopora verrucosa	Pocillopora	verrucosa	branching	Pacific	Moderate	2	41 ± 16% bleaching prevalence	Raymundo et al. 2019
Pocillopora verrucosa	Pocillopora	verrucosa	Pocillopora verrucosa	Pocillopora	verrucosa	branching	Pacific	High	3	75 ± 33% bleaching prevalence	Raymundo et al. 2019
Pocillopora woodjonesi	Pocillopora	woodjonesi	Pocillopora woodjonesi	Pocillopora	woodjonesi	branching	Pacific	None	0	0% bleaching prevalence	Raymundo et al. 2019
Pocillopora	Pocillopora	spp.	Pocillopora spp.	Pocillopora	spp.	branching	Pacific	Low	1	24 ± 28% bleaching prevalence	Raymundo et al. 2019
Porites annae	Porites	annae	Porites annae	Porites	annae	encrusting / columnar	Pacific	None	0	0 ± 1% bleaching prevalence	Raymundo et al. 2019
Porites annae	Porites	annae	Porites annae	Porites	annae	encrusting / columnar	Pacific	Moderate	2	41 ± 44% bleaching prevalence	Raymundo et al. 2019
Porites australiensis	Porites	australiensis	Porites australiensis	Porites	australiensis	encrusting	Pacific	Low	1	4 ± 14% bleaching prevalence	Raymundo et al. 2019
Porites cylindrica	Porites	cylindrica	Porites cylindrica	Porites	cylindrica	branching	Pacific	None	0	0% bleaching prevalence	Raymundo et al. 2019
Porites cylindrica	Porites	cylindrica	Porites cylindrica	Porites	cylindrica	branching	Pacific	Moderate	2	37 ± 25% bleaching prevalence	Raymundo et al. 2019
Porites deformis	Porites	deformis	Porites deformis	Porites	deformis	branching	Pacific	Low	1	9 ± 28% bleaching prevalence	Raymundo et al. 2019
Porites densa	Porites	densa	Porites densa	Porites	densa	encrusting	Pacific	Low	1	3 ± 9% bleaching prevalence	Raymundo et al. 2019
Porites lichen	Porites	lichen	Porites lichen	Porites	lichen	encrusting / plating	Pacific	Low	1	24 ± 27% bleaching prevalence	Raymundo et al. 2019
Porites lobata	Porites	lobata	Porites lobata	Porites	lobata	massive	Pacific	None	0	0% bleaching prevalence	Raymundo et al. 2019
Porites lutea	Porites	lutea	Porites lutea	Porites	lutea	massive	Pacific	Low	1	10 ± 29% bleaching prevalence	Raymundo et al. 2019
Porites	Porites	spp.	Porites spp. (massive)	Porites	spp.	massive	Pacific	Low	1	35 ± 10% bleaching prevalence	Raymundo et al. 2019
Porites	Porites	spp.	Porites spp. (massive)	Porites	spp.	massive	Pacific	Moderate	2	49 ± 26% bleaching prevalence	Raymundo et al. 2019
Porites	Porites	spp.	Porites spp. (massive)	Porites	spp.	massive	Pacific	Low	1	13 ± 29% bleaching prevalence	Raymundo et al. 2019
Porites myrmidonensis	Porites	myrmidonensis	Porites cf. myrmiodonensis	Porites	myrmiodonensis	massive	Pacific	Low	1	8 ± 28% bleaching prevalence	Raymundo et al. 2019
Porites myrmidonensis	Porites	myrmidonensis	Porites cf. myrmiodonensis	Porites	myrmiodonensis	massive	Pacific	Moderate	2	55 ± 0% bleaching prevalence	Raymundo et al. 2019
Porites rus	Porites	rus	Porites rus	Porites	rus	branching / encrusting	Pacific	Low	1	2 ± 3% bleaching prevalence	Raymundo et al. 2019
Porites rus	Porites	rus	Porites rus	Porites	rus	branching / encrusting	Pacific	High	3	63 ± 52% bleaching prevalence	Raymundo et al. 2019
Porites vaughani	Porites	vaughani	Porites vaughani	Porites	vaughani	encrusting	Pacific	High	3	67 ± 0% bleaching prevalence	Raymundo et al. 2019
Psammocora contigua	Psammocora	contigua	Psammocora contigua	Psammocora	contigua	branching / plating	Pacific	Low	1	18 ± 37% bleaching prevalence	Raymundo et al. 2019
Psammocora contigua	Psammocora	contigua	Psammocora contigua	Psammocora	contigua	branching / plating	Pacific	None	0	0% bleaching prevalence	Raymundo et al. 2019
Psammocora haimiana	Psammocora	haimiana	Psammocora haimeana	Psammocora	haimeana	encrusting	Pacific	Low	1	27 ± 44% bleaching prevalence	Raymundo et al. 2019
Psammocora nierstraszi	Psammocora	nierstraszi	Psammocora nierstraszi	Psammocora	nierstraszi	encrusting	Pacific	Low	1	29 ± 46% bleaching prevalence	Raymundo et al. 2019
Psammocora profundacella	Psammocora	profundacella	Psammocora profundacella	Psammocora	profundacella	encrusting	Pacific	Low	1	35 ± 47% bleaching prevalence	Raymundo et al. 2019
Psammocora	Psammocora	spp.	Psammocora spp.	Psammocora	spp.	encrusting	Pacific	Low	1	26 ± 34% bleaching prevalence	Raymundo et al. 2019
Sandalolitha dentata	Sandalolitha	dentata	Sandalolitha dentata	Sandalolitha	dentata	free-living	Pacific	Low	1	8 ± 28% bleaching prevalence	Raymundo et al. 2019
Scapophyllia cylindrica	Scapophyllia	cylindrica	Scapophyllia cylindrica	Scapophyllia	cylindrica	encrusting / columnar	Pacific	None	0	0% bleaching prevalence	Raymundo et al. 2019
Stylocoeniella armata	Stylocoeniella	armata	Stylocoeniella armata	Stylocoeniella	armata	encrusting	Pacific	Low	1	12 ± 30% bleaching prevalence	Raymundo et al. 2019
Stylocoeniella guentheri	Stylocoeniella	guentheri	Stylocoeniella guentheri	Stylocoeniella	guentheri	encrusting	Pacific	None	0	0% bleaching prevalence	Raymundo et al. 2019
Turbinaria reniformis	Turbinaria	reniformis	Turbinaria reniformis	Turbinaria	reniformis	plating	Pacific	Low	1	8 ± 28% bleaching prevalence	Raymundo et al. 2019
Turbinaria stellulata	Turbinaria	stellulata	Turbinaria stellulata	Turbinaria	stellulata	encrusting	Pacific	Low	1	12 ± 30% bleaching prevalence	Raymundo et al. 2019
Pocillopora capitata	Pocillopora	capitata	Pocillopora capitata	Pocillopora	capitata	branching	Pacific	Moderate	2	10-19% bleached	Reyes-Bonilla 2001
Pocillopora damicornis	Pocillopora	damicornis	Pocillopora damicornis	Pocillopora	damicornis	branching	Pacific	High	3	20-30% bleached	Reyes-Bonilla 2001
Pocillopora meandrina	Pocillopora	meandrina	Pocillopora meandrina	Pocillopora	meandrina	branching	Pacific	Moderate	2	10-19% bleached	Reyes-Bonilla 2001
Pocillopora verrucosa	Pocillopora	verrucosa	Pocillopora verrucosa	Pocillopora	verrucosa	branching	Pacific	High	3	20-30% bleached	Reyes-Bonilla 2001
Porites panamensis	Porites	panamensis	Porites panamensis	Porites	panamensis	columnar	Pacific	Moderate	2	10-19% bleached	Reyes-Bonilla 2001
Pavona gigantea	Pavona	gigantea	Pavona gigantea	Pavona	gigantea	massive	Pacific	Moderate	2	10-19% bleached	Reyes-Bonilla 2001
Pavona clavus	Pavona	clavus	Pavona clavus	Pavona	clavus	branching	Pacific	Low	1	<10% bleached	Reyes-Bonilla 2001
Psammocora stellata	Psammocora	stellata	Psammocora brighami	Psammocora	brighami	encrusting	Pacific	None	0	0% bleached	Reyes-Bonilla 2001
Psammocora stellata	Psammocora	stellata	Psammocora stellata	Psammocora	stellata	branching / encrusting	Pacific	None	0	0% bleached	Reyes-Bonilla 2001
Pocillopora capitata	Pocillopora	capitata	Pocillopora capitata	Pocillopora	capitata	branching	Pacific	High	3	20-30% bleached	Reyes-Bonilla 2001
Pocillopora damicornis	Pocillopora	damicornis	Pocillopora damicornis	Pocillopora	damicornis	branching	Pacific	High	3	20-30% bleached	Reyes-Bonilla 2001
Pocillopora meandrina	Pocillopora	meandrina	Pocillopora meandrina	Pocillopora	meandrina	branching	Pacific	High	3	20-30% bleached	Reyes-Bonilla 2001
Pocillopora verrucosa	Pocillopora	verrucosa	Pocillopora verrucosa	Pocillopora	verrucosa	branching	Pacific	High	3	20-30% bleached	Reyes-Bonilla 2001
Porites panamensis	Porites	panamensis	Porites panamensis	Porites	panamensis	columnar	Pacific	High	3	20-30% bleached	Reyes-Bonilla 2001
Pavona gigantea	Pavona	gigantea	Pavona gigantea	Pavona	gigantea	massive	Pacific	High	3	20-30% bleached	Reyes-Bonilla 2001
Pavona clavus	Pavona	clavus	Pavona clavus	Pavona	clavus	branching	Pacific	Moderate	2	10-19% bleached	Reyes-Bonilla 2001
Psammocora stellata	Psammocora	stellata	Psammocora brighami	Psammocora	brighami	encrusting	Pacific	Low	1	<10% bleached	Reyes-Bonilla 2001
Psammocora stellata	Psammocora	stellata	Psammocora stellata	Psammocora	stellata	branching / encrusting	Pacific	High	3	20-30% bleached	Reyes-Bonilla 2001
Pocillopora capitata	Pocillopora	capitata	Pocillopora capitata	Pocillopora	capitata	branching	Pacific	High	3	20-30% bleached	Reyes-Bonilla 2001
Pocillopora damicornis	Pocillopora	damicornis	Pocillopora damicornis	Pocillopora	damicornis	branching	Pacific	High	3	20-30% bleached	Reyes-Bonilla 2001
Pocillopora meandrina	Pocillopora	meandrina	Pocillopora meandrina	Pocillopora	meandrina	branching	Pacific	High	3	20-30% bleached	Reyes-Bonilla 2001
Pocillopora verrucosa	Pocillopora	verrucosa	Pocillopora verrucosa	Pocillopora	verrucosa	branching	Pacific	High	3	20-30% bleached	Reyes-Bonilla 2001
Porites panamensis	Porites	panamensis	Porites panamensis	Porites	panamensis	columnar	Pacific	High	3	20-30% bleached	Reyes-Bonilla 2001
Pavona gigantea	Pavona	gigantea	Pavona gigantea	Pavona	gigantea	massive	Pacific	High	3	20-30% bleached	Reyes-Bonilla 2001
Pavona clavus	Pavona	clavus	Pavona clavus	Pavona	clavus	branching	Pacific	High	3	20-30% bleached	Reyes-Bonilla 2001
Psammocora stellata	Psammocora	stellata	Psammocora brighami	Psammocora	brighami	encrusting	Pacific	None	0	0% bleached	Reyes-Bonilla 2001
Psammocora stellata	Psammocora	stellata	Psammocora stellata	Psammocora	stellata	branching / encrusting	Pacific	Low	1	<10% bleached	Reyes-Bonilla 2001
Cycloseris curvata	Cycloseris	curvata	Fungia curvata	Fungia	curvata	free-living	Pacific	None	0	0% bleached	Reyes-Bonilla 2001
Pocillopora capitata	Pocillopora	capitata	Pocillopora capitata	Pocillopora	capitata	branching	Pacific	Moderate	2	10-19% bleached	Reyes-Bonilla 2001
Pocillopora damicornis	Pocillopora	damicornis	Pocillopora damicornis	Pocillopora	damicornis	branching	Pacific	High	3	20-30% bleached	Reyes-Bonilla 2001
Pocillopora meandrina	Pocillopora	meandrina	Pocillopora meandrina	Pocillopora	meandrina	branching	Pacific	Moderate	2	10-19% bleached	Reyes-Bonilla 2001
Pocillopora verrucosa	Pocillopora	verrucosa	Pocillopora verrucosa	Pocillopora	verrucosa	branching	Pacific	High	3	20-30% bleached	Reyes-Bonilla 2001
Porites panamensis	Porites	panamensis	Porites panamensis	Porites	panamensis	columnar	Pacific	High	3	20-30% bleached	Reyes-Bonilla 2001
Porites sverdrupi	Porites	sverdrupi	Porites sverdrupi	Porites	sverdrupi	branching	Pacific	None	0	0% bleached	Reyes-Bonilla 2001
Pavona gigantea	Pavona	gigantea	Pavona gigantea	Pavona	gigantea	massive	Pacific	Moderate	2	10-19% bleached	Reyes-Bonilla 2001
Pavona clavus	Pavona	clavus	Pavona clavus	Pavona	clavus	branching	Pacific	Low	1	<10% bleached	Reyes-Bonilla 2001
Psammocora stellata	Psammocora	stellata	Psammocora stellata	Psammocora	stellata	branching / encrusting	Pacific	None	0	0% bleached	Reyes-Bonilla 2001
Cycloseris curvata	Cycloseris	curvata	Fungia curvata	Fungia	curvata	free-living	Pacific	None	0	0% bleached	Reyes-Bonilla 2001
Cycloseris distorta	Cycloseris	distorta	Fungia distorta	Fungia	distorta	free-living	Pacific	None	0	0% bleached	Reyes-Bonilla 2001
Pocillopora verrucosa	Pocillopora	verrucosa	Pocillopora verrucosa	Pocillopora	verrucosa	branching	Pacific	High	3	20-30% bleached	Reyes-Bonilla 2001
Porites panamensis	Porites	panamensis	Porites panamensis	Porites	panamensis	columnar	Pacific	Moderate	2	10-19% bleached	Reyes-Bonilla 2001
Porites sverdrupi	Porites	sverdrupi	Porites sverdrupi	Porites	sverdrupi	branching	Pacific	Low	1	<10% bleached	Reyes-Bonilla 2001
Pavona gigantea	Pavona	gigantea	Pavona gigantea	Pavona	gigantea	massive	Pacific	None	0	0% bleached	Reyes-Bonilla 2001
Pocillopora meandrina	Pocillopora	meandrina	Pocillopora meandrina	Pocillopora	meandrina	branching	Pacific	Severe	4	100% bleached	Ritson-Williams & Gates 2020
Pocillopora meandrina	Pocillopora	meandrina	Pocillopora meandrina	Pocillopora	meandrina	branching	Pacific	Severe	4	100% bleached	Ritson-Williams & Gates 2020
Pocillopora damicornis	Pocillopora	damicornis	Pocillopora damicornis	Pocillopora	damicornis	branching	Pacific	Severe	4	90.6% bleached	Ritson-Williams & Gates 2020
Pocillopora damicornis	Pocillopora	damicornis	Pocillopora damicornis	Pocillopora	damicornis	branching	Pacific	Severe	4	81.4% bleached	Ritson-Williams & Gates 2020
Montipora	Montipora	spp.	Montipora	Montipora	spp.	encrusting / plating	Pacific	High	3	65.3% bleached	Ritson-Williams & Gates 2020
Montipora	Montipora	spp.	Montipora	Montipora	spp.	encrusting / plating	Pacific	Moderate	2	44.3% bleached	Ritson-Williams & Gates 2020
Pavona varians	Pavona	varians	Pavona varians	Pavona	varians	encrusting	Pacific	High	3	62.9% bleached	Ritson-Williams & Gates 2020
Pavona varians	Pavona	varians	Pavona varians	Pavona	varians	encrusting	Pacific	Low	1	24.9% bleached	Ritson-Williams & Gates 2020
Porites compressa	Porites	compressa	Porites compressa	Porites	compressa	branching	Pacific	Moderate	2	43.7% bleached	Ritson-Williams & Gates 2020
Porites compressa	Porites	compressa	Porites compressa	Porites	compressa	branching	Pacific	Low	1	19.7% bleached	Ritson-Williams & Gates 2020
Montipora capitata	Montipora	capitata	Montipora capitata	Montipora	capitata	branching / encrusting	Pacific	Low	1	36.7% bleached	Ritson-Williams & Gates 2020
Montipora capitata	Montipora	capitata	Montipora capitata	Montipora	capitata	branching / encrusting	Pacific	Low	1	16.6% bleached	Ritson-Williams & Gates 2020
Fungia scutaria	Fungia	scutaria	Fungia scutaria	Fungia	scutaria	free-living	Pacific	Low	1	35.4% bleached	Ritson-Williams & Gates 2020
Fungia scutaria	Fungia	scutaria	Fungia scutaria	Fungia	scutaria	free-living	Pacific	Low	1	26.5% bleached	Ritson-Williams & Gates 2020
Leptastrea purpurea	Leptastrea	purpurea	Leptastrea purpurea	Leptastrea	purpurea	encrusting	Pacific	None	0	0.75% bleached	Ritson-Williams & Gates 2020
Leptastrea purpurea	Leptastrea	purpurea	Leptastrea purpurea	Leptastrea	purpurea	encrusting	Pacific	None	0	0% bleached	Ritson-Williams & Gates 2020
Pavona varians	Pavona	varians	Pavona varians	Pavona	varians	encrusting	Pacific	High	3	65% bleaching prevalence	Rodgers et al. 2017
Pocillopora meandrina	Pocillopora	meandrina	Pocillopora meandrina	Pocillopora	meandrina	branching	Pacific	High	3	65% bleaching prevalence	Rodgers et al. 2017
Porites lobata	Porites	lobata	Porites lobata	Porites	lobata	massive	Pacific	Moderate	2	45% bleaching prevalence	Rodgers et al. 2017
Montipora capitata	Montipora	capitata	Montipora capitata	Montipora	capitata	branching / encrusting	Pacific	Moderate	2	40% bleaching prevalence	Rodgers et al. 2017
Cyphastrea ocellina	Cyphastrea	ocellina	Cyphastrea ocellina	Cyphastrea	ocellina	massive / encrusting	Pacific	Moderate	2	40% bleaching prevalence	Rodgers et al. 2017
Porites compressa	Porites	compressa	Porites compressa	Porites	compressa	branching	Pacific	Low	1	15% bleaching prevalence	Rodgers et al. 2017
Acropora aspera	Acropora	aspera	Acropora aspera	Acropora	aspera	branching	Pacific	Severe	4	100% bleached	Sakai et al. 2019
Acropora digitifera	Acropora	digitifera	Acropora digitifera	Acropora	digitifera	corymbose	Pacific	Severe	4	97.4% bleached	Sakai et al. 2019
Acropora gemmifera	Acropora	gemmifera	Acropora gemmifera	Acropora	gemmifera	digitate	Pacific	Severe	4	97.5% bleached	Sakai et al. 2019
Acropora humilis	Acropora	humilis	Acropora humilis	Acropora	humilis	digitate	Pacific	Severe	4	100% bleached	Sakai et al. 2019
Acropora nasuta	Acropora	nasuta	Acropora nasuta	Acropora	nasuta	corymbose	Pacific	Severe	4	100% bleached	Sakai et al. 2019
Acropora monticulosa	Acropora	monticulosa	Acropora monticulosa	Acropora	monticulosa	digitate	Pacific	Severe	4	100% bleached	Sakai et al. 2019
Acropora intermedia	Acropora	intermedia	Acropora intermedia	Acropora	intermedia	branching	Pacific	High	3	83.3% bleached	Sakai et al. 2019
Acropora robusta	Acropora	robusta	Acropora robusta	Acropora	robusta	branching	Pacific	Severe	4	100% bleached	Sakai et al. 2019
Acropora valida	Acropora	valida	Acropora valida	Acropora	valida	corymbose	Pacific	Severe	4	100% bleached	Sakai et al. 2019
Acropora latistella	Acropora	latistella	Acropora latistella	Acropora	latistella	corymbose	Pacific	Severe	4	100% bleached	Sakai et al. 2019
Acropora	Acropora	spp.	Acropora (table)	Acropora	spp.	table / branching	Pacific	High	3	72.2% bleached	Sakai et al. 2019
Acropora	Acropora	sp.	Acropora	Acropora	sp.	table / branching	Indian	High	3	29.37 ± 19.2 Bleaching Response	Sebastián et al. 2009
Pocillopora	Pocillopora	sp.	Pocillopora	Pocillopora	sp.	branching	Indian	Low	1	8.54 ± 7.13 Bleaching Response	Sebastián et al. 2009
Montipora	Montipora	sp.	Montipora	Montipora	sp.	encrusting / plating	Indian	High	3	56.27 ± 13.3 Bleaching Response	Sebastián et al. 2009
Porites	Porites	sp.	Porites (massive)	Porites	sp.	massive	Indian	Low	1	14.48 ± 8.02 Bleaching Response	Sebastián et al. 2009
Favites	Favites	sp.	Favites	Favites	sp.	massive	Indian	Moderate	2	19.99 ± 18.4 Bleaching Response	Sebastián et al. 2009
Favia	Favia	sp.	Favia	Favia	sp.	massive	Indian	Moderate	2	19.40 ± 18.4 Bleaching Response	Sebastián et al. 2009
Stylophora	Stylophora	sp.	Stylophora	Stylophora	sp.	branching	Indian	High	3	64.45 ± 14.1 Bleaching Response	Sebastián et al. 2009
Galaxea	Galaxea	sp.	Galaxea	Galaxea	sp.	massive	Indian	Low	1	3.79 ± 6.2 Bleaching Response	Sebastián et al. 2009
Astreopora	Astreopora	sp.	Astreopora	Astreopora	sp.	massive / encrusting	Indian	Moderate	2	21.35 ± 16.0 Bleaching Response	Sebastián et al. 2009
Echinopora	Echinopora	sp.	Echinopora	Echinopora	sp.	plating	Indian	Low	1	9.99 ± 10.4 Bleaching Response	Sebastián et al. 2009
Goniastrea	Goniastrea	sp.	Goniastrea	Goniastrea	sp.	massive	Indian	Moderate	2	21.27 ± 15.8 Bleaching Response	Sebastián et al. 2009
Platygyra	Platygyra	sp.	Platygyra	Platygyra	sp.	massive	Indian	Low	1	0.99 ± 2.34 Bleaching Response	Sebastián et al. 2009
Goniopora	Goniopora	sp.	Goniopora	Goniopora	sp.	massive	Indian	Moderate	2	22.41 ± 20.7 Bleaching Response	Sebastián et al. 2009
Porites	Porites	sp.	Porites	Porites	sp.	massive	Indian	None	0	n/a (qualitative)	Spencer et al. 2000
Pavona	Pavona	sp.	Pavona	Pavona	sp.	massive	Indian	None	0	n/a (qualitative)	Spencer et al. 2000
Galaxea	Galaxea	sp.	Galaxea	Galaxea	sp.	massive	Indian	Severe	4	n/a (qualitative)	Spencer et al. 2000
Seriatopora	Seriatopora	sp.	Seriatopora	Seriatopora	sp.	branching	Indian	Severe	4	n/a (qualitative)	Spencer et al. 2000
Acropora	Acropora	sp.	Acropora	Acropora	sp.	table / branching	Indian	Severe	4	n/a (qualitative)	Spencer et al. 2000
Pocillopora	Pocillopora	sp.	Pocillopora	Pocillopora	sp.	branching	Indian	Severe	4	n/a (qualitative)	Spencer et al. 2000
Porites	Porites	sp.	Porites	Porites	sp.	massive	Indian	Low	1	n/a (qualitative)	Spencer et al. 2000
Pavona	Pavona	sp.	Pavona	Pavona	sp.	massive	Indian	Low	1	n/a (qualitative)	Spencer et al. 2000
Dipsastraea pallida	Dipsastraea	pallida	Favia pallida	Favia	pallida	massive	Indian	None	0	n/a (qualitative)	Spencer et al. 2000
Pocillopora damicornis	Pocillopora	damicornis	Pocillopora damicornis	Pocillopora	damicornis	branching	Pacific	High	3	n/a (estimated via field observations)	Stimson et al. 2002
Pocillopora verrucosa	Pocillopora	verrucosa	Pocillopora verrucosa	Pocillopora	verrucosa	branching	Pacific	High	3	n/a (estimated via field observations)	Stimson et al. 2002
Porites sillimaniani	Porites	sillimaniani	Porites sillimaniani	Porites	sillimaniani	branching	Pacific	High	3	n/a (estimated via field observations)	Stimson et al. 2002
Stylophora pistillata	Stylophora	pistillata	Stylophora pistillata	Stylophora	pistillata	branching	Pacific	High	3	n/a (estimated via field observations)	Stimson et al. 2002
Seriatopora hystrix	Seriatopora	hystrix	Seriatopora hystrix	Seriatopora	hystrix	branching	Pacific	High	3	n/a (estimated via field observations)	Stimson et al. 2002
Acropora secale	Acropora	secale	Acropora secale	Acropora	secale	branching	Pacific	High	3	n/a (estimated via field observations)	Stimson et al. 2002
Acropora aspera	Acropora	aspera	Acropora aspera	Acropora	aspera	table / branching	Pacific	High	3	n/a (estimated via field observations)	Stimson et al. 2002
Fungia fungites	Fungia	fungites	Fungia fungites	Fungia	fungites	free-living	Pacific	Moderate	2	n/a (estimated via field observations)	Stimson et al. 2002
Porites cylindrica	Porites	cylindrica	Porites cylindrica	Porites	cylindrica	branching	Pacific	Moderate	2	n/a (estimated via field observations)	Stimson et al. 2002
Cyphastrea	Cyphastrea	spp.	Cyphastrea spp.	Cyphastrea	spp.	massive	Pacific	Low	1	n/a (estimated via field observations)	Stimson et al. 2002
Dipsastraea speciosa	Dipsastraea	speciosa	Favia speciosa	Favia	speciosa	massive	Pacific	Low	1	n/a (estimated via field observations)	Stimson et al. 2002
Galaxea fascicularis	Galaxea	fascicularis	Galaxea fascicularis	Galaxea	fascicularis	massive	Pacific	Low	1	n/a (estimated via field observations)	Stimson et al. 2002
Coelastrea aspera	Coelastrea	aspera	Goniastrea aspera	Goniastrea	aspera	massive	Pacific	Low	1	n/a (estimated via field observations)	Stimson et al. 2002
Hydnophora microconos	Hydnophora	microconos	Hydnophora microconos	Hydnophora	microconos	massive	Pacific	Low	1	n/a (estimated via field observations)	Stimson et al. 2002
Leptastrea	Leptastrea	spp.	Leptastrea spp.	Leptastrea	spp.	encrusting	Pacific	Low	1	n/a (estimated via field observations)	Stimson et al. 2002
Montipora aequituberculata	Montipora	aequituberculata	Montipora aequituberculata	Montipora	aequituberculata	plating	Pacific	Low	1	n/a (estimated via field observations)	Stimson et al. 2002
Montipora digitata	Montipora	digitata	Montipora digitata	Montipora	digitata	columnar	Pacific	Low	1	n/a (estimated via field observations)	Stimson et al. 2002
Pachyseris rugosa	Pachyseris	rugosa	Pachyseris rugosa	Pachyseris	rugosa	encrusting / plating	Pacific	Low	1	n/a (estimated via field observations)	Stimson et al. 2002
Pavona cactus	Pavona	cactus	Pavona cactus	Pavona	cactus	plating	Pacific	Low	1	n/a (estimated via field observations)	Stimson et al. 2002
Platygyra	Platygyra	spp.	Platygyra spp.	Platygyra	spp.	massive	Pacific	Low	1	n/a (estimated via field observations)	Stimson et al. 2002
Porites lutea	Porites	lutea	Porites lutea	Porites	lutea	massive	Pacific	Low	1	n/a (estimated via field observations)	Stimson et al. 2002
Porites rus	Porites	rus	Porites rus	Porites	rus	branching / encrusting	Pacific	Low	1	n/a (estimated via field observations)	Stimson et al. 2002
Psammocora contigua	Psammocora	contigua	Psammocora contigua	Psammocora	contigua	encrusting	Pacific	Low	1	n/a (estimated via field observations)	Stimson et al. 2002
Turbinaria	Turbinaria	spp.	Turbinaria spp.	Turbinaria	spp.	plating	Pacific	Low	1	n/a (estimated via field observations)	Stimson et al. 2002
Agaricia	Agaricia	spp.	Agaricia spp.	Agaricia	spp.	plating	Atlantic	Moderate	2	30.9% partially bleached; 14.3% heavily bleached	Teixeira et al. 2019
Favia gravida	Favia	gravida	Favia gravida	Favia	gravida	massive / encrusting	Atlantic	Severe	4	55.2% partially bleached; 25.6% heavily bleached	Teixeira et al. 2019
Montastraea cavernosa	Montastraea	cavernosa	Montastraea cavernosa	Montastraea	cavernosa	massive	Atlantic	Severe	4	61.4% partially bleached; 18.4% heavily bleached	Teixeira et al. 2019
Mussismilia braziliensis	Mussismilia	braziliensis	Mussismilia braziliensis	Mussismilia	braziliensis	massive	Atlantic	Moderate	2	25.4% partially bleached; 10.2% heavily bleached	Teixeira et al. 2019
Mussismilia harttii	Mussismilia	harttii	Mussismilia harttii	Mussismilia	harttii	encrusting	Atlantic	High	3	38.3% partially bleached; 25.6% heavily bleached	Teixeira et al. 2019
Mussismilia hispida	Mussismilia	hispida	Mussismilia hispida	Mussismilia	hispida	massive / encrusting	Atlantic	Severe	4	46.9% partially bleached; 35.8% heavily bleached	Teixeira et al. 2019
Porites	Porites	spp.	Porites spp.	Porites	spp.	branching / massive	Atlantic	Severe	4	47.6% partially bleached; 33.8% heavily bleached	Teixeira et al. 2019
Siderastrea	Siderastrea	spp.	Siderastrea spp.	Siderastrea	spp.	massive	Atlantic	High	3	45.2% partially bleached; 28.2% heavily bleached	Teixeira et al. 2019
Agaricia	Agaricia	spp.	Agaricia spp.	Agaricia	spp.	plating	Atlantic	Low	1	20.8% partially bleached; 1.5% heavily bleached	Teixeira et al. 2019
Favia gravida	Favia	gravida	Favia gravida	Favia	gravida	massive / encrusting	Atlantic	Severe	4	71.5% partially bleached; 14% heavily bleached	Teixeira et al. 2019
Montastraea cavernosa	Montastraea	cavernosa	Montastraea cavernosa	Montastraea	cavernosa	massive	Atlantic	Severe	4	69.4% partially bleached; 14.2% heavily bleached	Teixeira et al. 2019
Mussismilia braziliensis	Mussismilia	braziliensis	Mussismilia braziliensis	Mussismilia	braziliensis	massive	Atlantic	Low	1	19.4% partially bleached; 3.1% heavily bleached	Teixeira et al. 2019
Mussismilia harttii	Mussismilia	harttii	Mussismilia harttii	Mussismilia	harttii	encrusting	Atlantic	Severe	4	41.8% partially bleached; 50.5% heavily bleached	Teixeira et al. 2019
Mussismilia hispida	Mussismilia	hispida	Mussismilia hispida	Mussismilia	hispida	massive / encrusting	Atlantic	Severe	4	60.6% partially bleached; 31.8% heavily bleached	Teixeira et al. 2019
Porites	Porites	spp.	Porites spp.	Porites	spp.	branching / massive	Atlantic	Severe	4	10.1% partially bleached; 87.3% heavily bleached	Teixeira et al. 2019
Siderastrea	Siderastrea	spp.	Siderastrea spp.	Siderastrea	spp.	massive	Atlantic	Severe	4	2.7% partially bleached; 85.1% heavily bleached	Teixeira et al. 2019
Acropora	Acropora	sp.	Acropora	Acropora	sp.	branching	Indian	Severe	4	86.36% bleaching prevalence	Thinesh et al. 2019
Porites	Porites	sp.	Porites	Porites	sp.	branching / massive	Indian	High	3	65.45% bleaching prevalence	Thinesh et al. 2019
Favites	Favites	sp.	Favites	Favites	sp.	massive	Indian	Low	1	5.88% bleaching prevalence	Thinesh et al. 2019
Lobophyllia	Lobophyllia	sp.	Symphyllia	Symphyllia	sp.	encrusting	Indian	Moderate	2	51.11% bleaching prevalence	Thinesh et al. 2019
Favia	Favia	sp.	Favia	Favia	sp.	massive	Indian	Moderate	2	55.77% bleaching prevalence	Thinesh et al. 2019
Platygyra	Platygyra	sp.	Platygyra	Platygyra	sp.	massive	Indian	Moderate	2	41.67% bleaching prevalence	Thinesh et al. 2019
Goniastrea	Goniastrea	sp.	Goniastrea	Goniastrea	sp.	massive	Indian	Moderate	2	41.83% bleaching prevalence	Thinesh et al. 2019
Acropora	Acropora	sp.	Acropora	Acropora	sp.	branching	Pacific	High	3	n/a (qualitative)	Tkachenko & Soong 2017
Pocillopora	Pocillopora	sp.	Pocillopora	Pocillopora	sp.	branching	Pacific	High	3	n/a (qualitative)	Tkachenko & Soong 2017
Montipora	Montipora	sp.	Montipora	Montipora	sp.	encrusting / plating	Pacific	High	3	n/a (qualitative)	Tkachenko & Soong 2017
Porites	Porites	sp.	Porites (massive)	Porites	sp.	massive	Pacific	Low	1	n/a (qualitative)	Tkachenko & Soong 2017
Echinopora	Echinopora	sp.	Echinopora	Echinopora	sp.	plating	Pacific	Low	1	n/a (qualitative)	Tkachenko & Soong 2017
Pavona	Pavona	sp.	Pavona	Pavona	sp.	encrusting	Pacific	Low	1	n/a (qualitative)	Tkachenko & Soong 2017
Turbinaria	Turbinaria	sp.	Turbinaria	Turbinaria	sp.	plating	Pacific	Low	1	n/a (qualitative)	Tkachenko & Soong 2017
Fungia	Fungia	sp.	Fungia	Fungia	sp.	free-living	Pacific	Low	1	10 Bleaching Index	Valino et al. 2021
Porites	Porites	sp.	Porites	Porites	sp.	branching	Pacific	Low	1	2 Bleaching Index	Valino et al. 2021
Turbinaria	Turbinaria	sp.	Turbinaria	Turbinaria	sp.	plating	Pacific	Low	1	21 Bleaching Index	Valino et al. 2021
Favites	Favites	sp.	Favites	Favites	sp.	massive	Pacific	Low	1	12 Bleaching Index	Valino et al. 2021
Pachyseris	Pachyseris	sp.	Pachyseris	Pachyseris	sp.	plating	Pacific	Moderate	2	40 Bleaching Index	Valino et al. 2021
Porites	Porites	sp.	Porites	Porites	sp.	massive	Pacific	Low	1	19 Bleaching Index	Valino et al. 2021
Montipora	Montipora	sp.	Montipora	Montipora	sp.	plating	Pacific	Low	1	19 Bleaching Index	Valino et al. 2021
Galaxea	Galaxea	sp.	Galaxea	Galaxea	sp.	massive	Pacific	None	0	0 Bleaching Index	Valino et al. 2021
Merulina	Merulina	sp.	Merulina	Merulina	sp.	plating	Pacific	Low	1	36 Bleaching Index	Valino et al. 2021
Porites	Porites	sp.	Porites	Porites	sp.	encrusting	Pacific	Low	1	12 Bleaching Index	Valino et al. 2021
Acropora	Acropora	sp.	Acropora	Acropora	sp.	branching	Pacific	Low	1	37 Bleaching Index	Valino et al. 2021
Oxypora	Oxypora	sp.	Oxypora	Oxypora	sp.	plating	Pacific	Low	1	16 Bleaching Index	Valino et al. 2021
Pavona	Pavona	sp.	Pavona	Pavona	sp.	massive / encrusting	Pacific	High	3	60 Bleaching Index	Valino et al. 2021
Lobophyllia	Lobophyllia	sp.	Symphyllia	Symphyllia	sp.	encrusting	Pacific	Low	1	6 Bleaching Index	Valino et al. 2021
Platygyra	Platygyra	sp.	Platygyra	Platygyra	sp.	massive	Pacific	Low	1	30 Bleaching Index	Valino et al. 2021
Cycloseris	Cycloseris	sp.	Cycloseris	Cycloseris	sp.	free-living	Pacific	Low	1	2 Bleaching Index	Valino et al. 2021
Favia	Favia	sp.	Favia	Favia	sp.	massive	Pacific	Low	1	28 Bleaching Index	Valino et al. 2021
Echinophyllia	Echinophyllia	sp.	Echinophyllia	Echinophyllia	sp.	plating	Pacific	Low	1	37 Bleaching Index	Valino et al. 2021
Lobophyllia	Lobophyllia	sp.	Lobophyllia	Lobophyllia	sp.	encrusting	Pacific	Low	1	39 Bleaching Index	Valino et al. 2021
Porites	Porites	sp.	Porites	Porites	sp.	branching	Pacific	Low	1	7 Bleaching Index	Valino et al. 2021
Fungia	Fungia	sp.	Fungia	Fungia	sp.	free-living	Pacific	Low	1	10 Bleaching Index	Valino et al. 2021
Pavona	Pavona	sp.	Pavona	Pavona	sp.	massive / encrusting	Pacific	Moderate	2	43 Bleaching Index	Valino et al. 2021
Pachyseris	Pachyseris	sp.	Pachyseris	Pachyseris	sp.	plating	Pacific	Low	1	25 Bleaching Index	Valino et al. 2021
Montipora	Montipora	sp.	Montipora	Montipora	sp.	branching	Pacific	None	0	0 Bleaching Index	Valino et al. 2021
Montipora	Montipora	sp.	Montipora	Montipora	sp.	plating	Pacific	Low	1	7 Bleaching Index	Valino et al. 2021
Merulina	Merulina	sp.	Merulina	Merulina	sp.	plating	Pacific	Low	1	29 Bleaching Index	Valino et al. 2021
Porites	Porites	sp.	Porites	Porites	sp.	massive	Pacific	Low	1	31 Bleaching Index	Valino et al. 2021
Porites	Porites	sp.	Porites	Porites	sp.	encrusting	Pacific	Low	1	32 Bleaching Index	Valino et al. 2021
Acropora	Acropora	sp.	Acropora	Acropora	sp.	branching	Pacific	Low	1	6 Bleaching Index	Valino et al. 2021
Oxypora	Oxypora	sp.	Oxypora	Oxypora	sp.	plating	Pacific	Low	1	19 Bleaching Index	Valino et al. 2021
Galaxea	Galaxea	sp.	Galaxea	Galaxea	sp.	massive	Pacific	Low	1	8 Bleaching Index	Valino et al. 2021
Turbinaria	Turbinaria	sp.	Turbinaria	Turbinaria	sp.	plating	Pacific	Moderate	2	54 Bleaching Index	Valino et al. 2021
Pectinia	Pectinia	sp.	Pectinia	Pectinia	sp.	branching / plating	Pacific	Low	1	27 Bleaching Index	Valino et al. 2021
Fungia	Fungia	sp.	Fungia	Fungia	sp.	free-living	Pacific	Low	1	8 Bleaching Index	Valino et al. 2021
Porites	Porites	sp.	Porites	Porites	sp.	branching	Pacific	Low	1	3 Bleaching Index	Valino et al. 2021
Porites	Porites	sp.	Porites	Porites	sp.	encrusting	Pacific	Low	1	8 Bleaching Index	Valino et al. 2021
Echinopora	Echinopora	sp.	Echinopora	Echinopora	sp.	plating	Pacific	High	3	75 Bleaching Index	Valino et al. 2021
Acropora	Acropora	sp.	Acropora	Acropora	sp.	branching	Pacific	Low	1	31 Bleaching Index	Valino et al. 2021
Pavona	Pavona	sp.	Pavona	Pavona	sp.	massive / encrusting	Pacific	Low	1	32 Bleaching Index	Valino et al. 2021
Pachyseris	Pachyseris	sp.	Pachyseris	Pachyseris	sp.	plating	Pacific	Low	1	39 Bleaching Index	Valino et al. 2021
Porites	Porites	sp.	Porites	Porites	sp.	massive	Pacific	Low	1	27 Bleaching Index	Valino et al. 2021
Galaxea	Galaxea	sp.	Galaxea	Galaxea	sp.	massive	Pacific	None	0	0 Bleaching Index	Valino et al. 2021
Turbinaria	Turbinaria	sp.	Turbinaria	Turbinaria	sp.	plating	Pacific	Low	1	31 Bleaching Index	Valino et al. 2021
Seriatopora	Seriatopora	sp.	Seriatopora	Seriatopora	sp.	branching	Pacific	Low	1	7 Bleaching Index	Valino et al. 2021
Merulina	Merulina	sp.	Merulina	Merulina	sp.	plating	Pacific	Moderate	2	46 Bleaching Index	Valino et al. 2021
Favites	Favites	sp.	Favites	Favites	sp.	massive	Pacific	Low	1	32 Bleaching Index	Valino et al. 2021
Acropora	Acropora	sp.	Acropora (table)	Acropora	sp.	table / branching	Pacific	Low	1	33.3% bleached	Vargas-Ángel et al. 2011
Acropora	Acropora	sp.	Acropora (staghorn)	Acropora	sp.	branching	Pacific	Moderate	2	39.4% bleached	Vargas-Ángel et al. 2011
Acropora	Acropora	sp.	Acropora (other)	Acropora	sp.	branching	Pacific	Low	1	12.1% bleached	Vargas-Ángel et al. 2011
Fungia	Fungia	sp.	Fungia	Fungia	sp.	free-living	Pacific	Moderate	2	41.1% bleached	Vargas-Ángel et al. 2011
Pocillopora	Pocillopora	sp.	Pocillopora	Pocillopora	sp.	branching	Pacific	High	3	65% bleached	Vargas-Ángel et al. 2011
Pavona	Pavona	sp.	Pavona	Pavona	sp.	massive / encrusting	Pacific	Low	1	32.1% bleached	Vargas-Ángel et al. 2011
Favia	Favia	sp.	Favia	Favia	sp.	massive	Pacific	Low	1	21.2% bleached	Vargas-Ángel et al. 2011
Montipora	Montipora	sp.	Montipora	Montipora	sp.	encrusting / plating	Pacific	None	0	0% bleached	Vargas-Ángel et al. 2011
Porites	Porites	sp.	Porites	Porites	sp.	massive	Pacific	Low	1	16.1% bleached	Vargas-Ángel et al. 2011
Leptoseris	Leptoseris	sp.	Leptoseris	Leptoseris	sp.	encrusting	Pacific	Moderate	2	57.7% bleached	Vargas-Ángel et al. 2011
Psammocora	Psammocora	sp.	Psammocora	Psammocora	sp.	encrusting	Pacific	Low	1	11.5% bleached	Vargas-Ángel et al. 2011
Leptastrea	Leptastrea	sp.	Leptastrea	Leptastrea	sp.	encrusting	Pacific	Severe	4	88.9% bleached	Vargas-Ángel et al. 2011
Hydnophora	Hydnophora	sp.	Hydnophora	Hydnophora	sp.	massive	Pacific	Low	1	33.3% bleached	Vargas-Ángel et al. 2011
Favites	Favites	sp.	Favites	Favites	sp.	massive	Pacific	Low	1	25% bleached	Vargas-Ángel et al. 2011
Cyphastrea	Cyphastrea	sp.	Cyphastrea	Cyphastrea	sp.	massive	Pacific	Moderate	2	50% bleached	Vargas-Ángel et al. 2011
Acropora	Acropora	sp.	Acropora (table)	Acropora	sp.	table / branching	Pacific	High	3	66.7% bleached	Vargas-Ángel et al. 2011
Acropora	Acropora	sp.	Acropora (staghorn)	Acropora	sp.	branching	Pacific	High	3	75.6% bleached	Vargas-Ángel et al. 2011
Acropora	Acropora	sp.	Acropora (other)	Acropora	sp.	branching	Pacific	High	3	67.3% bleached	Vargas-Ángel et al. 2011
Fungia	Fungia	sp.	Fungia	Fungia	sp.	free-living	Pacific	Moderate	2	56.4% bleached	Vargas-Ángel et al. 2011
Pocillopora	Pocillopora	sp.	Pocillopora	Pocillopora	sp.	branching	Pacific	High	3	62.2% bleached	Vargas-Ángel et al. 2011
Pavona	Pavona	sp.	Pavona	Pavona	sp.	massive / encrusting	Pacific	Low	1	37.3% bleached	Vargas-Ángel et al. 2011
Favia	Favia	sp.	Favia	Favia	sp.	massive	Pacific	Low	1	37.7% bleached	Vargas-Ángel et al. 2011
Montipora	Montipora	sp.	Montipora	Montipora	sp.	encrusting / plating	Pacific	Low	1	4.8% bleached	Vargas-Ángel et al. 2011
Porites	Porites	sp.	Porites	Porites	sp.	massive	Pacific	Low	1	24.6% bleached	Vargas-Ángel et al. 2011
Leptoseris	Leptoseris	sp.	Leptoseris	Leptoseris	sp.	encrusting	Pacific	High	3	64.3% bleached	Vargas-Ángel et al. 2011
Psammocora	Psammocora	sp.	Psammocora	Psammocora	sp.	encrusting	Pacific	Low	1	11.3% bleached	Vargas-Ángel et al. 2011
Leptastrea	Leptastrea	sp.	Leptastrea	Leptastrea	sp.	encrusting	Pacific	Low	1	23.1% bleached	Vargas-Ángel et al. 2011
Hydnophora	Hydnophora	sp.	Hydnophora	Hydnophora	sp.	massive	Pacific	Low	1	5.4% bleached	Vargas-Ángel et al. 2011
Favites	Favites	sp.	Favites	Favites	sp.	massive	Pacific	Low	1	13.3% bleached	Vargas-Ángel et al. 2011
Cyphastrea	Cyphastrea	sp.	Cyphastrea	Cyphastrea	sp.	massive	Pacific	None	0	0% bleached	Vargas-Ángel et al. 2011
Echinopora	Echinopora	sp.	Echinopora	Echinopora	sp.	plating	Pacific	None	0	0% bleached	Vargas-Ángel et al. 2011
Gardineroseris	Gardineroseris	sp.	Gardineroseris	Gardineroseris	sp.	massive	Pacific	None	0	0% bleached	Vargas-Ángel et al. 2011
Sandalolitha	Sandalolitha	sp.	Sandalolitha	Sandalolitha	sp.	free-living	Pacific	Severe	4	100% bleached	Vargas-Ángel et al. 2011
Stylophora	Stylophora	sp.	Stylophora	Stylophora	sp.	branching	Pacific	High	3	45% bleaching prevalence	Williams et al. 2010
Montastraea	Montastraea	sp.	Montastrea	Montastrea	sp.	massive	Pacific	High	3	35% bleaching prevalence	Williams et al. 2010
Halomitra	Halomitra	sp.	Halomitra	Halomitra	sp.	free-living	Pacific	High	3	~30% bleaching prevalence	Williams et al. 2010
Porites	Porites	sp.	Porites	Porites	sp.	massive	Pacific	Moderate	2	~25% bleaching prevalence	Williams et al. 2010
Echinophyllia	Echinophyllia	sp.	Echinophyllia	Echinophyllia	sp.	plating	Pacific	Moderate	2	~25% bleaching prevalence	Williams et al. 2010
Goniastrea	Goniastrea	sp.	Goniastrea	Goniastrea	sp.	massive	Pacific	Moderate	2	~25% bleaching prevalence	Williams et al. 2010
Fungia	Fungia	sp.	Fungia	Fungia	sp.	free-living	Pacific	Moderate	2	20% bleaching prevalence	Williams et al. 2010
Favites	Favites	sp.	Favites	Favites	sp.	massive	Pacific	Moderate	2	20% bleaching prevalence	Williams et al. 2010
Favia	Favia	sp.	Favia	Favia	sp.	massive	Pacific	Moderate	2	~15% bleaching prevalence	Williams et al. 2010
Hydnophora	Hydnophora	sp.	Hydnophora	Hydnophora	sp.	massive	Pacific	Moderate	2	~15% bleaching prevalence	Williams et al. 2010
Merulina	Merulina	sp.	Merulina	Merulina	sp.	plating	Pacific	Moderate	2	~15% bleaching prevalence	Williams et al. 2010
Platygyra	Platygyra	sp.	Platygyra	Platygyra	sp.	massive	Pacific	Low	1	10% bleaching prevalence	Williams et al. 2010
Lobophyllia	Lobophyllia	sp.	Lobophyllia	Lobophyllia	sp.	encrusting	Pacific	Low	1	10% bleaching prevalence	Williams et al. 2010
Gardineroseris	Gardineroseris	sp.	Gardineroseris	Gardineroseris	sp.	massive	Pacific	Low	1	~10% bleaching prevalence	Williams et al. 2010
Montipora	Montipora	sp.	Montipora	Montipora	sp.	encrusting / plating	Pacific	Low	1	~10% bleaching prevalence	Williams et al. 2010
Pavona	Pavona	sp.	Pavona	Pavona	sp.	massive / encrusting	Pacific	Low	1	~5% bleaching prevalence	Williams et al. 2010
Acropora	Acropora	sp.	Acropora	Acropora	sp.	table / branching	Pacific	Low	1	~5% bleaching prevalence	Williams et al. 2010
Pocillopora	Pocillopora	sp.	Pocillopora	Pocillopora	sp.	branching	Pacific	Low	1	<5% bleaching prevalence	Williams et al. 2010
Leptoseris	Leptoseris	sp.	Leptoseris	Leptoseris	sp.	encrusting	Pacific	Low	1	<5% bleaching prevalence	Williams et al. 2010
Psammocora	Psammocora	sp.	Psammocora	Psammocora	sp.	encrusting	Pacific	Low	1	<5% bleaching prevalence	Williams et al. 2010
Leptastrea	Leptastrea	sp.	Leptastrea	Leptastrea	sp.	encrusting	Pacific	Low	1	<5% bleaching prevalence	Williams et al. 2010
Astreopora	Astreopora	sp.	Astreopora	Astreopora	sp.	massive / encrusting	Pacific	Low	1	<5% bleaching prevalence	Williams et al. 2010
Turbinaria	Turbinaria	sp.	Turbinaria	Turbinaria	sp.	plating	Pacific	None	0	0% bleaching prevalence	Williams et al. 2010
Pocillopora	Pocillopora	sp.	Pocillopora	Pocillopora	sp.	branching	Indian	Mixed	n/a	24% slightly bleached; 63% moderately bleached; 13% severely bleached	Floros et al. 2004
Acropora	Acropora	sp.	Acropora (branching)	Acropora	sp.	branching	Indian	Moderate	2	100% moderately bleached	Floros et al. 2004
Astreopora	Astreopora	sp.	Astreopora	Astreopora	sp.	massive / encrusting	Indian	Mixed	n/a	25% slightly bleached; 25% moderately bleached; 50% severely bleached	Floros et al. 2004
Alveopora	Alveopora	sp.	Alveopora	Alveopora	sp.	massive	Indian	Low	1	100% slightly bleached	Floros et al. 2004
Echinophyllia	Echinophyllia	sp.	Echinophyllia	Echinophyllia	sp.	plating	Indian	Low	1	67% slightly bleached; 33% moderately bleached	Floros et al. 2004
Hydnophora	Hydnophora	sp.	Hydnophora	Hydnophora	sp.	massive	Indian	Low	1	100% slightly bleached	Floros et al. 2004
Platygyra	Platygyra	sp.	Platygyra	Platygyra	sp.	massive	Indian	Low	1	100% slightly bleached	Floros et al. 2004
Pocillopora	Pocillopora	sp.	Pocillopora	Pocillopora	sp.	branching	Indian	Mixed	n/a	32% slightly bleached; 38% moderately bleached; 28% severely bleached	Floros et al. 2004
Montipora	Montipora	sp.	Montipora	Montipora	sp.	encrusting / plating	Indian	Mixed	n/a	35% slightly bleached; 29% moderately bleached; 35% severely bleached	Floros et al. 2004
Acropora	Acropora	sp.	Acropora (branching)	Acropora	sp.	branching	Indian	Mixed	n/a	20% slightly bleached; 27% moderately bleached; 53% severely bleached	Floros et al. 2004
Acropora	Acropora	sp.	Acropora (table)	Acropora	sp.	table / branching	Indian	Mixed	n/a	44% slightly bleached; 6% moderately bleached; 38% severely bleached	Floros et al. 2004
Astreopora	Astreopora	sp.	Astreopora	Astreopora	sp.	massive / encrusting	Indian	Mixed	n/a	33% slightly bleached; 40% moderately bleached; 27% severely bleached	Floros et al. 2004
Porites	Porites	sp.	Porites	Porites	sp.	branching / massive	Indian	Severe	4	13% slightly bleached; 13% moderately bleached; 75% severely bleached	Floros et al. 2004
Alveopora	Alveopora	sp.	Alveopora	Alveopora	sp.	massive	Indian	Mixed	n/a	33% slightly bleached; 33% moderately bleached; 33% severely bleached	Floros et al. 2004
Coscinaraea	Coscinaraea	sp.	Coscinarea	Coscinarea	sp.	encrusting / plating	Indian	Mixed	n/a	5% slightly bleached; 42% moderately bleached; 53% severely bleached	Floros et al. 2004
Galaxea	Galaxea	sp.	Galaxea	Galaxea	sp.	massive	Indian	Low	1	100% slightly bleached	Floros et al. 2004
Echinophyllia	Echinophyllia	sp.	Echinophyllia	Echinophyllia	sp.	plating	Indian	Mixed	n/a	33% slightly bleached; 17% moderately bleached; 50% severely bleached	Floros et al. 2004
Acanthastrea	Acanthastrea	sp.	Acanthastrea	Acanthastrea	sp.	encrusting	Indian	Mixed	n/a	31% slightly bleached; 23% moderately bleached; 45% severely bleached	Floros et al. 2004
Hydnophora	Hydnophora	sp.	Hydnophora	Hydnophora	sp.	massive	Indian	Severe	4	100% severely bleached	Floros et al. 2004
Favia	Favia	sp.	Favia	Favia	sp.	massive	Indian	Mixed	n/a	18% slightly bleached; 36% moderately bleached; 45% severely bleached	Floros et al. 2004
Favites	Favites	sp.	Favites	Favites	sp.	massive	Indian	Mixed	n/a	50% slightly bleached; 20% moderately bleached; 30% severely bleached	Floros et al. 2004
Platygyra	Platygyra	sp.	Platygyra	Platygyra	sp.	massive	Indian	Mixed	n/a	50% slightly bleached; 50% severely bleached	Floros et al. 2004
Oulophyllia	Oulophyllia	sp.	Oulophyllia	Oulophyllia	sp.	massive	Indian	Severe	4	100% severely bleached	Floros et al. 2004
Echinopora	Echinopora	sp.	Echinopora	Echinopora	sp.	plating	Indian	Mixed	n/a	33% slightly bleached; 33% moderately bleached; 33% severely bleached	Floros et al. 2004
Pocillopora	Pocillopora	sp.	Pocillopora	Pocillopora	sp.	branching	Indian	Mixed	n/a	58% slightly bleached; 28% moderately bleached; 14% severely bleached	Floros et al. 2004
Montipora	Montipora	sp.	Montipora	Montipora	sp.	encrusting / plating	Indian	Mixed	n/a	54% slightly bleached; 35% moderately bleached; 11% severely bleached	Floros et al. 2004
Acropora	Acropora	sp.	Acropora (branching)	Acropora	sp.	branching	Indian	Low	1	75% slightly bleached; 25% moderately bleached	Floros et al. 2004
Acropora	Acropora	sp.	Acropora (table)	Acropora	sp.	table / branching	Indian	Low	1	100% slightly bleached	Floros et al. 2004
Astreopora	Astreopora	sp.	Astreopora	Astreopora	sp.	massive / encrusting	Indian	Low	1	76% slightly bleached; 21% moderately bleached; 3% severely bleached	Floros et al. 2004
Porites	Porites	sp.	Porites	Porites	sp.	branching / massive	Indian	Low	1	73% slightly bleached; 7% moderately bleached; 20% severely bleached	Floros et al. 2004
Alveopora	Alveopora	sp.	Alveopora	Alveopora	sp.	massive	Indian	Moderate	2	50% slightly bleached; 50% moderately bleached	Floros et al. 2004
Coscinaraea	Coscinaraea	sp.	Coscinarea	Coscinarea	sp.	encrusting / plating	Indian	Mixed	n/a	65% slightly bleached; 24% moderately bleached; 11% severely bleached	Floros et al. 2004
Pavona	Pavona	sp.	Pavona	Pavona	sp.	massive	Indian	Low	1	100% slightly bleached	Floros et al. 2004
Galaxea	Galaxea	sp.	Galaxea	Galaxea	sp.	massive	Indian	Low	1	88% slightly bleached; 13% moderately bleached	Floros et al. 2004
Echinophyllia	Echinophyllia	sp.	Echinophyllia	Echinophyllia	sp.	plating	Indian	Low	1	85% slightly bleached; 15% moderately bleached	Floros et al. 2004
Acanthastrea	Acanthastrea	sp.	Acanthastrea	Acanthastrea	sp.	encrusting	Indian	Low	1	77% slightly bleached; 15% moderately bleached; 18% severely bleached	Floros et al. 2004
Lobophyllia	Lobophyllia	sp.	Symphyllia	Symphyllia	sp.	encrusting	Indian	Moderate	2	100% moderately bleached	Floros et al. 2004
Hydnophora	Hydnophora	sp.	Hydnophora	Hydnophora	sp.	massive	Indian	Low	1	50% slightly bleached	Floros et al. 2004
Favia	Favia	sp.	Favia	Favia	sp.	massive	Indian	Low	1	73% slightly bleached; 24% moderately bleached; 3% severely bleached	Floros et al. 2004
Favites	Favites	sp.	Favites	Favites	sp.	massive	Indian	Low	1	75% slightly bleached; 19% moderately bleached; 7% severely bleached	Floros et al. 2004
Goniastrea	Goniastrea	sp.	Goniastrea	Goniastrea	sp.	massive	Indian	Mixed	n/a	50% slightly bleached; 50% severely bleached	Floros et al. 2004
Platygyra	Platygyra	sp.	Platygyra	Platygyra	sp.	massive	Indian	Low	1	85% slightly bleached; 4% moderately bleached; 11% severely bleached	Floros et al. 2004
Cyphastrea	Cyphastrea	sp.	Cyphastrea	Cyphastrea	sp.	massive	Indian	Low	1	67% slightly bleached	Floros et al. 2004
Echinopora	Echinopora	sp.	Echinopora	Echinopora	sp.	plating	Indian	Low	1	100% slightly bleached	Floros et al. 2004
Astreopora	Astreopora	sp.	Astreopora	Astreopora	sp.	massive / encrusting	Indian	Mixed	n/a	36% slightly bleached; 21% moderately bleached; 43% severely bleached	Floros et al. 2004
Pocillopora	Pocillopora	sp.	Pocillopora	Pocillopora	sp.	branching	Indian	Mixed	n/a	44% slightly bleached; 31% moderately bleached; 25% severely bleached	Floros et al. 2004
Montipora	Montipora	sp.	Montipora	Montipora	sp.	encrusting / plating	Indian	Mixed	n/a	65% slightly bleached; 21% moderately bleached; 13% severely bleached	Floros et al. 2004
Acropora	Acropora	sp.	Acropora (branching)	Acropora	sp.	branching	Indian	Severe	4	100% severely bleached	Floros et al. 2004
Acropora	Acropora	sp.	Acropora (table)	Acropora	sp.	table / branching	Indian	Mixed	n/a	63% slightly bleached; 25% moderately bleached; 13% severely bleached	Floros et al. 2004
Astreopora	Astreopora	sp.	Astreopora	Astreopora	sp.	massive / encrusting	Indian	Low	1	70% slightly bleached; 10% moderately bleached; 20% severely bleached	Floros et al. 2004
Porites	Porites	sp.	Porites	Porites	sp.	branching / massive	Indian	Low	1	100% slightly bleached	Floros et al. 2004
Goniopora	Goniopora	sp.	Goniopora	Goniopora	sp.	massive	Indian	Mixed	n/a	50% slightly bleached; 50% severely bleached	Floros et al. 2004
Alveopora	Alveopora	sp.	Alveopora	Alveopora	sp.	massive	Indian	High	3	50% moderately bleached; 50% severely bleached	Floros et al. 2004
Coscinaraea	Coscinaraea	sp.	Coscinarea	Coscinarea	sp.	encrusting / plating	Indian	Severe	4	100% severely bleached	Floros et al. 2004
Galaxea	Galaxea	sp.	Galaxea	Galaxea	sp.	massive	Indian	Mixed	n/a	33% slightly bleached; 33% moderately bleached; 33% severely bleached	Floros et al. 2004
Echinophyllia	Echinophyllia	sp.	Echinophyllia	Echinophyllia	sp.	plating	Indian	Low	1	100% slightly bleached	Floros et al. 2004
Acanthastrea	Acanthastrea	sp.	Acanthastrea	Acanthastrea	sp.	encrusting	Indian	Moderate	2	100% moderately bleached	Floros et al. 2004
Favia	Favia	sp.	Favia	Favia	sp.	massive	Indian	Low	1	100% slightly bleached	Floros et al. 2004
Favites	Favites	sp.	Favites	Favites	sp.	massive	Indian	Low	1	83% slightly bleached; 17% moderately bleached	Floros et al. 2004
Platygyra	Platygyra	sp.	Platygyra	Platygyra	sp.	massive	Indian	Mixed	n/a	50% slightly bleached; 50% severely bleached	Floros et al. 2004
Echinopora	Echinopora	sp.	Echinopora	Echinopora	sp.	plating	Indian	Low	1	100% slightly bleached	Floros et al. 2004
Pocillopora	Pocillopora	sp.	Pocillopora	Pocillopora	sp.	branching	Indian	Mixed	n/a	43% slightly bleached; 29% moderately bleached; 29% severely bleached	Floros et al. 2004
Montipora	Montipora	sp.	Montipora	Montipora	sp.	encrusting / plating	Indian	Low	1	77% slightly bleached; 18% moderately bleached; 2% severely bleached	Floros et al. 2004
Acropora	Acropora	sp.	Acropora (branching)	Acropora	sp.	branching	Indian	Mixed	n/a	60% slightly bleached; 20% moderately bleached; 20% severely bleached	Floros et al. 2004
Acropora	Acropora	sp.	Acropora (table)	Acropora	sp.	table / branching	Indian	Moderate	2	50% moderately bleached	Floros et al. 2004
Astreopora	Astreopora	sp.	Astreopora	Astreopora	sp.	massive / encrusting	Indian	Low	1	80% slightly bleached; 10% moderately bleached; 10% severely bleached	Floros et al. 2004
Porites	Porites	sp.	Porites	Porites	sp.	branching / massive	Indian	Low	1	86% slightly bleached; 14% moderately bleached	Floros et al. 2004
Goniopora	Goniopora	sp.	Goniopora	Goniopora	sp.	massive	Indian	Low	1	100% slightly bleached	Floros et al. 2004
Coscinaraea	Coscinaraea	sp.	Coscinarea	Coscinarea	sp.	encrusting / plating	Indian	Mixed	n/a	43% slightly bleached; 29% moderately bleached; 29% severely bleached	Floros et al. 2004
Pavona	Pavona	sp.	Pavona	Pavona	sp.	massive	Indian	Low	1	100% slightly bleached	Floros et al. 2004
Gardineroseris	Gardineroseris	sp.	Gardineroseris	Gardineroseris	sp.	massive	Indian	Low	1	100% slightly bleached	Floros et al. 2004
Galaxea	Galaxea	sp.	Galaxea	Galaxea	sp.	massive	Indian	Moderate	2	53% slightly bleached; 47% moderately bleached	Floros et al. 2004
Echinophyllia	Echinophyllia	sp.	Echinophyllia	Echinophyllia	sp.	plating	Indian	Mixed	n/a	88% slightly bleached; 13% severely bleached	Floros et al. 2004
Acanthastrea	Acanthastrea	sp.	Acanthastrea	Acanthastrea	sp.	encrusting	Indian	Low	1	53% slightly bleached; 13% moderately bleached	Floros et al. 2004
Lobophyllia	Lobophyllia	sp.	Symphyllia	Symphyllia	sp.	encrusting	Indian	Low	1	86% slightly bleached; 14% moderately bleached	Floros et al. 2004
Favia	Favia	sp.	Favia	Favia	sp.	massive	Indian	Low	1	90% slightly bleached; 10% moderately bleached	Floros et al. 2004
Favites	Favites	sp.	Favites	Favites	sp.	massive	Indian	Low	1	71% slightly bleached; 29% severely bleached	Floros et al. 2004
Platygyra	Platygyra	sp.	Platygyra	Platygyra	sp.	massive	Indian	Low	1	100% slightly bleached	Floros et al. 2004
Oulophyllia	Oulophyllia	sp.	Oulophyllia	Oulophyllia	sp.	massive	Indian	Moderate	2	33% slightly bleached; 67% moderately bleached	Floros et al. 2004
Cyphastrea	Cyphastrea	sp.	Cyphastrea	Cyphastrea	sp.	massive	Indian	Low	1	100% slightly bleached	Floros et al. 2004
Echinopora	Echinopora	sp.	Echinopora	Echinopora	sp.	plating	Indian	Low	1	100% slightly bleached	Floros et al. 2004
Pocillopora	Pocillopora	sp.	Pocillopora	Pocillopora	sp.	branching	Indian	Moderate	2	50% slightly bleached; 50% moderately bleached	Floros et al. 2004
Montipora	Montipora	sp.	Montipora	Montipora	sp.	encrusting / plating	Indian	High	3	50% severely bleached	Floros et al. 2004
Echinophyllia	Echinophyllia	sp.	Echinophyllia	Echinophyllia	sp.	plating	Indian	Low	1	100% slightly bleached	Floros et al. 2004
Pocillopora	Pocillopora	sp.	Pocillopora	Pocillopora	sp.	branching	Indian	Moderate	2	50% slightly bleached; 50% moderately bleached	Floros et al. 2004
Montipora	Montipora	sp.	Montipora	Montipora	sp.	encrusting / plating	Indian	Mixed	n/a	56% slightly bleached; 31% moderately bleached; 13% severely bleached	Floros et al. 2004
Astreopora	Astreopora	sp.	Astreopora	Astreopora	sp.	massive / encrusting	Indian	Moderate	2	50% slightly bleached; 50% moderately bleached	Floros et al. 2004
Goniopora	Goniopora	sp.	Goniopora	Goniopora	sp.	massive	Indian	Severe	4	100% severely bleached	Floros et al. 2004
Coscinaraea	Coscinaraea	sp.	Coscinarea	Coscinarea	sp.	encrusting / plating	Indian	Mixed	n/a	43% slightly bleached; 28% moderately bleached; 9% severely bleached	Floros et al. 2004
Fungia	Fungia	sp.	Fungia	Fungia	sp.	free-living	Indian	Severe	4	100% severely bleached	Floros et al. 2004
Galaxea	Galaxea	sp.	Galaxea	Galaxea	sp.	massive	Indian	Moderate	2	100% moderately bleached	Floros et al. 2004
Echinophyllia	Echinophyllia	sp.	Echinophyllia	Echinophyllia	sp.	plating	Indian	Low	1	70% slightly bleached; 30% moderately bleached	Floros et al. 2004
Acanthastrea	Acanthastrea	sp.	Acanthastrea	Acanthastrea	sp.	encrusting	Indian	Moderate	2	100% moderately bleached	Floros et al. 2004
Favia	Favia	sp.	Favia	Favia	sp.	massive	Indian	Mixed	n/a	44% slightly bleached; 33% moderately bleached; 22% severely bleached	Floros et al. 2004
Favites	Favites	sp.	Favites	Favites	sp.	massive	Indian	Mixed	n/a	50% slightly bleached; 50% severely bleached	Floros et al. 2004
Platygyra	Platygyra	sp.	Platygyra	Platygyra	sp.	massive	Indian	Mixed	n/a	60% slightly bleached; 20% moderately bleached; 20% severely bleached	Floros et al. 2004
Echinopora	Echinopora	sp.	Echinopora	Echinopora	sp.	plating	Indian	Low	1	100% slightly bleached	Floros et al. 2004
Pocillopora	Pocillopora	sp.	Pocillopora	Pocillopora	sp.	branching	Indian	Mixed	n/a	39% slightly bleached; 39% moderately bleached; 22% severely bleached	Floros et al. 2004
Montipora	Montipora	sp.	Montipora	Montipora	sp.	encrusting / plating	Indian	Mixed	n/a	52% slightly bleached; 36% moderately bleached; 12% severely bleached	Floros et al. 2004
Acropora	Acropora	sp.	Acropora (table)	Acropora	sp.	table / branching	Indian	Moderate	2	50% slightly bleached; 50% moderately bleached	Floros et al. 2004
Astreopora	Astreopora	sp.	Astreopora	Astreopora	sp.	massive / encrusting	Indian	Low	1	60% slightly bleached; 40% moderately bleached	Floros et al. 2004
Porites	Porites	sp.	Porites	Porites	sp.	branching / massive	Indian	Low	1	93% slightly bleached; 7% moderately bleached	Floros et al. 2004
Coscinaraea	Coscinaraea	sp.	Coscinarea	Coscinarea	sp.	encrusting / plating	Indian	Low	1	70% slightly bleached; 21% moderately bleached; 5% severely bleached	Floros et al. 2004
Pavona	Pavona	sp.	Pavona	Pavona	sp.	massive	Indian	Severe	4	100% severely bleached	Floros et al. 2004
Fungia	Fungia	sp.	Fungia	Fungia	sp.	free-living	Indian	Mixed	n/a	67% slightly bleached; 33% severely bleached	Floros et al. 2004
Galaxea	Galaxea	sp.	Galaxea	Galaxea	sp.	massive	Indian	Low	1	79% slightly bleached; 14% moderately bleached; 7% severely bleached	Floros et al. 2004
Echinophyllia	Echinophyllia	sp.	Echinophyllia	Echinophyllia	sp.	plating	Indian	Low	1	100% slightly bleached	Floros et al. 2004
Acanthastrea	Acanthastrea	sp.	Acanthastrea	Acanthastrea	sp.	encrusting	Indian	Low	1	73% slightly bleached; 18% moderately bleached; 9% severely bleached	Floros et al. 2004
Favia	Favia	sp.	Favia	Favia	sp.	massive	Indian	Low	1	73% slightly bleached; 20% moderately bleached; 8% severely bleached	Floros et al. 2004
Favites	Favites	sp.	Favites	Favites	sp.	massive	Indian	Low	1	75% slightly bleached; 6% moderately bleached; 13% severely bleached	Floros et al. 2004
Goniastrea	Goniastrea	sp.	Goniastrea	Goniastrea	sp.	massive	Indian	Low	1	75% slightly bleached; 25% moderately bleached	Floros et al. 2004
Platygyra	Platygyra	sp.	Platygyra	Platygyra	sp.	massive	Indian	Mixed	n/a	62% slightly bleached; 31% moderately bleached; 8% severely bleached	Floros et al. 2004
Oulophyllia	Oulophyllia	sp.	Oulophyllia	Oulophyllia	sp.	massive	Indian	Low	1	100% slightly bleached	Floros et al. 2004
Echinopora	Echinopora	sp.	Echinopora	Echinopora	sp.	plating	Indian	Low	1	100% slightly bleached	Floros et al. 2004
Halomitra	Halomitra	sp.	Halomitra	Halomitra	sp.	free-living	Indian	High	3	62 Bleaching Index	Ibrahim et al. 2017
Cycloseris	Cycloseris	sp.	Cycloseris	Cycloseris	sp.	free-living	Indian	High	3	60 Bleaching Index	Ibrahim et al. 2017
Fungia	Fungia	sp.	Fungia	Fungia	sp.	free-living	Indian	High	3	58 Bleaching Index	Ibrahim et al. 2017
Pectinia	Pectinia	sp.	Pectinia	Pectinia	sp.	branching / plating	Indian	High	3	52 Bleaching Index	Ibrahim et al. 2017
Herpolitha	Herpolitha	sp.	Herpolitha	Herpolitha	sp.	free-living	Indian	High	3	51 Bleaching Index	Ibrahim et al. 2017
Gardineroseris	Gardineroseris	sp.	Gardineroseris	Gardineroseris	sp.	massive	Indian	Moderate	2	50 Bleaching Index	Ibrahim et al. 2017
Merulina	Merulina	sp.	Merulina	Merulina	sp.	plating	Indian	Moderate	2	50 Bleaching Index	Ibrahim et al. 2017
Acropora	Acropora	sp.	Acropora	Acropora	sp.	table / branching	Indian	Moderate	2	47 Bleaching Index	Ibrahim et al. 2017
Galaxea	Galaxea	sp.	Galaxea	Galaxea	sp.	massive	Indian	Moderate	2	44 Bleaching Index	Ibrahim et al. 2017
Echinopora	Echinopora	sp.	Echinopora	Echinopora	sp.	plating	Indian	Moderate	2	43 Bleaching Index	Ibrahim et al. 2017
Psammocora	Psammocora	sp.	Psammocora	Psammocora	sp.	encrusting	Indian	Moderate	2	41 Bleaching Index	Ibrahim et al. 2017
Caulastraea	Caulastraea	sp.	Caulastraea	Caulastraea	sp.	massive / encrusting	Indian	Moderate	2	40 Bleaching Index	Ibrahim et al. 2017
Montipora	Montipora	sp.	Montipora	Montipora	sp.	encrusting / plating	Indian	Moderate	2	39 Bleaching Index	Ibrahim et al. 2017
Cyphastrea	Cyphastrea	sp.	Cyphastrea	Cyphastrea	sp.	massive	Indian	Moderate	2	33 Bleaching Index	Ibrahim et al. 2017
Goniastrea	Goniastrea	sp.	Goniastrea	Goniastrea	sp.	massive	Indian	Moderate	2	33 Bleaching Index	Ibrahim et al. 2017
Pachyseris	Pachyseris	sp.	Pachyseris	Pachyseris	sp.	plating	Indian	Moderate	2	32 Bleaching Index	Ibrahim et al. 2017
Oxypora	Oxypora	sp.	Oxypora	Oxypora	sp.	plating	Indian	Moderate	2	32 Bleaching Index	Ibrahim et al. 2017
Turbinaria	Turbinaria	sp.	Turbinaria	Turbinaria	sp.	plating	Indian	Moderate	2	32 Bleaching Index	Ibrahim et al. 2017
Platygyra	Platygyra	sp.	Platygyra	Platygyra	sp.	massive	Indian	Moderate	2	31 Bleaching Index	Ibrahim et al. 2017
Favia	Favia	sp.	Favia	Favia	sp.	massive	Indian	Moderate	2	30 Bleaching Index	Ibrahim et al. 2017
Pocillopora	Pocillopora	sp.	Pocillopora	Pocillopora	sp.	branching	Indian	Moderate	2	28 Bleaching Index	Ibrahim et al. 2017
Plesiastrea	Plesiastrea	sp.	Plesiastrea	Plesiastrea	sp.	encrusting	Indian	Moderate	2	27 Bleaching Index	Ibrahim et al. 2017
Podabacia	Podabacia	sp.	Podabacia	Podabacia	sp.	encrusting / plating	Indian	Moderate	2	27 Bleaching Index	Ibrahim et al. 2017
Leptoseris	Leptoseris	sp.	Leptoseris	Leptoseris	sp.	encrusting	Indian	Moderate	2	27 Bleaching Index	Ibrahim et al. 2017
Hydnophora	Hydnophora	sp.	Hydnophora	Hydnophora	sp.	massive	Indian	Moderate	2	27 Bleaching Index	Ibrahim et al. 2017
Echinophyllia	Echinophyllia	sp.	Echinophyllia	Echinophyllia	sp.	plating	Indian	Moderate	2	26 Bleaching Index	Ibrahim et al. 2017
Lobophyllia	Lobophyllia	sp.	Symphyllia	Symphyllia	sp.	encrusting	Indian	Moderate	2	26 Bleaching Index	Ibrahim et al. 2017
Montastraea	Montastraea	sp.	Montastraea	Montastraea	sp.	massive	Indian	Moderate	2	25 Bleaching Index	Ibrahim et al. 2017
Mycedium	Mycedium	sp.	Mycedium	Mycedium	sp.	plating	Indian	Moderate	2	23 Bleaching Index	Ibrahim et al. 2017
Ctenactis	Ctenactis	sp.	Ctenactis	Ctenactis	sp.	free-living	Indian	Moderate	2	23 Bleaching Index	Ibrahim et al. 2017
Porites	Porites	sp.	Porites (massive)	Porites	sp.	massive	Indian	Moderate	2	22 Bleaching Index	Ibrahim et al. 2017
Lobophyllia	Lobophyllia	sp.	Lobophyllia	Lobophyllia	sp.	plating	Indian	Moderate	2	21 Bleaching Index	Ibrahim et al. 2017
Diploastrea	Diploastrea	sp.	Diploastrea	Diploastrea	sp.	massive	Indian	Low	1	20 Bleaching Index	Ibrahim et al. 2017
Leptoria	Leptoria	sp.	Leptoria	Leptoria	sp.	massive	Indian	Low	1	20 Bleaching Index	Ibrahim et al. 2017
Astreopora	Astreopora	sp.	Astreopora	Astreopora	sp.	massive / encrusting	Indian	Low	1	20 Bleaching Index	Ibrahim et al. 2017
Pavona	Pavona	sp.	Pavona	Pavona	sp.	massive / encrusting	Indian	Low	1	19 Bleaching Index	Ibrahim et al. 2017
Alveopora	Alveopora	sp.	Alveopora	Alveopora	sp.	massive	Indian	Low	1	17 Bleaching Index	Ibrahim et al. 2017
Goniopora	Goniopora	sp.	Goniopora	Goniopora	sp.	massive	Indian	Low	1	16 Bleaching Index	Ibrahim et al. 2017
Acanthastrea	Acanthastrea	sp.	Acanthastrea	Acanthastrea	sp.	encrusting	Indian	Low	1	16 Bleaching Index	Ibrahim et al. 2017
Coscinaraea	Coscinaraea	sp.	Coscinaraea	Coscinaraea	sp.	encrusting / plating	Indian	Low	1	15 Bleaching Index	Ibrahim et al. 2017
Leptastrea	Leptastrea	sp.	Leptastrea	Leptastrea	sp.	encrusting	Indian	Low	1	12 Bleaching Index	Ibrahim et al. 2017
Porites	Porites	sp.	Porites (branching)	Porites	sp.	branching	Indian	Low	1	12 Bleaching Index	Ibrahim et al. 2017
Favites	Favites	sp.	Favites	Favites	sp.	massive	Indian	Low	1	12 Bleaching Index	Ibrahim et al. 2017
Coscinaraea	Coscinaraea	sp.	Coscinaraea	Coscinaraea	sp.	encrusting / plating	Indian	Low	1	100% slightly bleached	Kavousi et al. 2014
Dipsastraea	Dipsastraea	sp.	Dipsastraea	Dipsastraea	sp.	massive	Indian	Severe	4	100% fully bleached	Kavousi et al. 2014
Favites	Favites	sp.	Favites	Favites	sp.	massive	Indian	High	3	81.4% fully bleached; 13.7% slightly bleached; 4.9% healthy	Kavousi et al. 2014
Montipora	Montipora	sp.	Montipora	Montipora	sp.	encrusting / plating	Indian	None	0	100% healthy	Kavousi et al. 2014
Porites	Porites	sp.	Porites	Porites	sp.	massive	Indian	Moderate	2	46.7% fully bleached; 53.3% mostly bleached	Kavousi et al. 2014
Dipsastraea	Dipsastraea	sp.	Dipsastraea	Dipsastraea	sp.	massive	Indian	Severe	4	100% fully bleached	Kavousi et al. 2014
Platygyra	Platygyra	sp.	Platygyra	Platygyra	sp.	massive	Indian	Severe	4	100% fully bleached	Kavousi et al. 2014
Porites	Porites	sp.	Porites	Porites	sp.	massive	Indian	Mixed	n/a	5.1% fully bleached; 25% mostly bleached; 69.6% slightly bleached	Kavousi et al. 2014
Siderastrea	Siderastrea	sp.	Siderastrea	Siderastrea	sp.	massive	Indian	High	3	71.4% fully bleached; 28.6% mostly bleached	Kavousi et al. 2014
Acropora	Acropora	sp.	Acropora	Acropora	sp.	branching	Indian	Mixed	n/a	2.4% mostly bleached; 66.6% slightly bleached; 31% healthy	Kavousi et al. 2014
Cyphastrea	Cyphastrea	sp.	Cyphastrea	Cyphastrea	sp.	massive	Indian	Low	1	100% slightly bleached	Kavousi et al. 2014
Dipsastraea	Dipsastraea	sp.	Dipsastraea	Dipsastraea	sp.	massive	Indian	Mixed	n/a	9.4% fully bleached; 6.3% mostly bleached; 68.7% slightly bleached; 15.6% healthy	Kavousi et al. 2014
Favites	Favites	sp.	Favites	Favites	sp.	massive	Indian	Mixed	n/a	20% mostly bleached; 60% slightly bleached; 20% healthy	Kavousi et al. 2014
Goniopora	Goniopora	sp.	Goniopora	Goniopora	sp.	massive	Indian	Low	1	3% fully bleached; 97% slightly bleached	Kavousi et al. 2014
Montipora	Montipora	sp.	Montipora	Montipora	sp.	encrusting / plating	Indian	Mixed	n/a	13.3% fully bleached; 26.7% mostly bleached; 50% slightly bleached; 10% healthy	Kavousi et al. 2014
Platygyra	Platygyra	sp.	Platygyra	Platygyra	sp.	massive	Indian	Mixed	n/a	6.5% mostly bleached; 71% slightly bleached; 22.5% healthy	Kavousi et al. 2014
Pocillopora	Pocillopora	sp.	Pocillopora	Pocillopora	sp.	branching	Indian	Mixed	n/a	25% fully bleached; 53.6% mostly bleached; 10.7% slightly bleached; 10.7% healthy	Kavousi et al. 2014
Porites	Porites	sp.	Porites	Porites	sp.	massive	Indian	Mixed	n/a	7.4% fully bleached; 10.7% mostly bleached; 73.8% slightly bleached; 8.1% healthy	Kavousi et al. 2014
Psammocora	Psammocora	sp.	Psammocora	Psammocora	sp.	encrusting	Indian	Low	1	50% slightly bleached; 50% healthy	Kavousi et al. 2014
Stylophora	Stylophora	sp.	Stylophora	Stylophora	sp.	branching	Indian	Low	1	28.6% slightly bleached; 71.4% healthy	Kavousi et al. 2014
Acanthastrea	Acanthastrea	sp.	Acanthastrea	Acanthastrea	sp.	encrusting	Indian	Mixed	n/a	50% fully bleached; 50% healthy	Kavousi et al. 2014
Acropora	Acropora	sp.	Acropora	Acropora	sp.	branching	Indian	Mixed	n/a	9.1% fully bleached; 19.4% mostly bleached; 41.6% slightly bleached; 29.9% healthy	Kavousi et al. 2014
Cyphastrea	Cyphastrea	sp.	Cyphastrea	Cyphastrea	sp.	massive	Indian	Mixed	n/a	20% mostly bleached; 30% slightly bleached; 50% healthy	Kavousi et al. 2014
Echinopora	Echinopora	sp.	Echinopora	Echinopora	sp.	plating	Indian	Mixed	n/a	16.7% fully bleached; 33.3% mostly bleached; 50% slightly bleached	Kavousi et al. 2014
Dipsastraea	Dipsastraea	sp.	Dipsastraea	Dipsastraea	sp.	massive	Indian	Mixed	n/a	22.7% fully bleached; 22.7% mostly bleached; 31.8% slightly bleached; 22.8% healthy	Kavousi et al. 2014
Favites	Favites	sp.	Favites	Favites	sp.	massive	Indian	Mixed	n/a	26.4% fully bleached; 21.2% mostly bleached; 26.4% slightly bleached; 26% healthy	Kavousi et al. 2014
Goniopora	Goniopora	sp.	Goniopora	Goniopora	sp.	massive	Indian	Mixed	n/a	53.3% fully bleached; 13.3% mostly bleached; 33.4% slightly bleached	Kavousi et al. 2014
Montipora	Montipora	sp.	Montipora	Montipora	sp.	encrusting / plating	Indian	High	3	100% mostly bleached	Kavousi et al. 2014
Pavona	Pavona	sp.	Pavona	Pavona	sp.	massive / encrusting	Indian	Mixed	n/a	50% mostly bleached; 50% healthy	Kavousi et al. 2014
Platygyra	Platygyra	sp.	Platygyra	Platygyra	sp.	massive	Indian	Mixed	n/a	3.4% fully bleached; 69.5% mostly bleached; 23.7% slightly bleached; 3.4% healthy	Kavousi et al. 2014
Pocillopora	Pocillopora	sp.	Pocillopora	Pocillopora	sp.	branching	Indian	Severe	4	100% fully bleached	Kavousi et al. 2014
Porites	Porites	sp.	Porites	Porites	sp.	massive	Indian	Mixed	n/a	14.3% fully bleached; 17.9% mostly bleached; 42.8% slightly bleached; 25% healthy	Kavousi et al. 2014
Lobophyllia	Lobophyllia	sp.	Symphyllia	Symphyllia	sp.	encrusting	Indian	None	0	100% healthy	Kavousi et al. 2014
Turbinaria	Turbinaria	sp.	Turbinaria	Turbinaria	sp.	plating	Indian	Low	1	100% slightly bleached	Kavousi et al. 2014
Favites	Favites	sp.	Favites	Favites	sp.	massive	Indian	High	3	100% mostly bleached	Kavousi et al. 2014
Leptastrea	Leptastrea	sp.	Leptastrea	Leptastrea	sp.	encrusting	Indian	None	0	100% healthy	Kavousi et al. 2014
Pavona	Pavona	sp.	Pavona	Pavona	sp.	massive / encrusting	Indian	None	0	100% healthy	Kavousi et al. 2014
Platygyra	Platygyra	sp.	Platygyra	Platygyra	sp.	massive	Indian	Mixed	n/a	44.9% fully bleached; 11.2% mostly bleached; 43.9% slightly bleached	Kavousi et al. 2014
Acropora	Acropora	sp.	Acropora	Acropora	sp.	branching	Indian	Mixed	n/a	50% mostly bleached; 50% healthy	Kavousi et al. 2014
Dipsastraea	Dipsastraea	sp.	Dipsastraea	Dipsastraea	sp.	massive	Indian	Mixed	n/a	25% fully bleached; 75% healthy	Kavousi et al. 2014
Platygyra	Platygyra	sp.	Platygyra	Platygyra	sp.	massive	Indian	Low	1	25% slightly bleached; 75% healthy	Kavousi et al. 2014
Porites	Porites	sp.	Porites	Porites	sp.	massive	Indian	Mixed	n/a	5.7% mostly bleached; 94.3% healthy	Kavousi et al. 2014
Fungia	Fungia	sp.	Fungia	Fungia	sp.	free-living	Pacific	Severe	4	100% bleached	Vo et al. 2020
Pachyseris	Pachyseris	sp.	Pachyseris	Pachyseris	sp.	plating	Pacific	Severe	4	100% bleached	Vo et al. 2020
Pavona	Pavona	sp.	Pavona	Pavona	sp.	massive / encrusting	Pacific	Severe	4	100% bleached	Vo et al. 2020
Pectinia	Pectinia	sp.	Pectinia	Pectinia	sp.	branching / plating	Pacific	Severe	4	93.8 ± 10.2% bleached	Vo et al. 2020
Porites	Porites	sp.	Porites (massive)	Porites	sp.	massive	Pacific	High	3	69.9 ± 15.2% bleached	Vo et al. 2020
Favites	Favites	sp.	Favites	Favites	sp.	massive	Pacific	Moderate	2	30.0 ± 26.7% bleached	Vo et al. 2020
Goniastrea	Goniastrea	sp.	Goniastrea	Goniastrea	sp.	massive	Pacific	Moderate	2	23.8 ± 26.1% bleached	Vo et al. 2020
Montipora	Montipora	sp.	Montipora	Montipora	sp.	encrusting / plating	Pacific	Moderate	2	10.1 ± 5.7% bleached	Vo et al. 2020
Galaxea	Galaxea	sp.	Galaxea	Galaxea	sp.	massive	Pacific	None	0	0% bleached	Vo et al. 2020
Diploastrea	Diploastrea	sp.	Diploastrea	Diploastrea	sp.	massive	Pacific	None	0	0% bleached	Vo et al. 2020
Acropora	Acropora	sp.	Acropora	Acropora	sp.	table / branching	Pacific	Low	1	0.9 ± 1.3% bleached	Vo et al. 2020
Astreopora cucullata	Astreopora	cucullata	Astreopora cucullata	Astreopora	cucullata	encrusting / plating	Pacific	High	3	97.2% bleached, pale or mottled	Carilli et al. 2017
Astreopora myriophthalma	Astreopora	myriophthalma	Astreopora myriophthalama	Astreopora	myriophthalma	massive / encrusting	Pacific	High	3	96.9% bleached, pale or mottled	Carilli et al. 2017
Leptastrea purpurea	Leptastrea	purpurea	Leptastrea purpurea	Leptastrea	purpurea	encrusting	Pacific	High	3	92.1% bleached, pale or mottled	Carilli et al. 2017
Pocillopora meandrina	Pocillopora	meandrina	Pocillopora meandrina	Pocillopora	meandrina	branching	Pacific	High	3	97.2% bleached, pale or mottled	Carilli et al. 2017
Pocillopora verrucosa	Pocillopora	verrucosa	Pocillopora verrucosa	Pocillopora	verrucosa	branching	Pacific	High	3	93.9% bleached, pale or mottled	Carilli et al. 2017
Pocillopora	Pocillopora	sp.	Pocillopora	Pocillopora	sp.	branching	Pacific	High	3	97.6% bleached, pale or mottled	Carilli et al. 2017
Dipsastraea matthaii	Dipsastraea	matthaii	Favia matthaii	Favia	matthaii	massive	Pacific	Moderate	2	39.4% bleached, pale or mottled	Carilli et al. 2017
Favia	Dipsastraea	sp.	Favia	Favia	sp.	massive	Pacific	Low	1	18.2% bleached, pale or mottled	Carilli et al. 2017
Favites	Favites	sp.	Favites	Favites	sp.	massive	Pacific	Low	1	19% bleached, pale or mottled	Carilli et al. 2017
Porites rus	Porites	rus	Porites rus	Porites	rus	branching / encrusting	Pacific	Low	1	6.9% bleached, pale or mottled	Carilli et al. 2017
Porites solida	Porites	solida	Porites solida	Porites	solida	massive	Pacific	Moderate	2	49.3% bleached, pale or mottled	Carilli et al. 2017
Porites	Porites	sp.	Porites (massive)	Porites	sp.	massive	Pacific	Moderate	2	68.3% bleached, pale or mottled	Carilli et al. 2017
Montipora patula	Montipora	patula	Montipora patula	Montipora	patula	encrusting	Pacific	None	0	0% bleached	Kenyon & Brainard 2006
Montipora capitata	Montipora	capitata	Montipora capitata	Montipora	capitata	branching / encrusting	Pacific	None	0	0% bleached	Kenyon & Brainard 2006
Montipora flabellata	Montipora	flabellata	Montipora flabellata	Montipora	flabellata	encrusting	Pacific	None	0	0% bleached	Kenyon & Brainard 2006
Porites evermanni	Porites	evermanni	Porites evermanni	Porites	evermanni	massive / columnar	Pacific	None	0	0% bleached	Kenyon & Brainard 2006
Porites compressa	Porites	compressa	Porites compressa	Porites	compressa	branching	Pacific	None	0	0% bleached	Kenyon & Brainard 2006
Porites lobata	Porites	lobata	Porites lobata	Porites	lobata	massive	Pacific	None	0	0% bleached	Kenyon & Brainard 2006
Pocillopora damicornis	Pocillopora	damicornis	Pocillopora damicornis	Pocillopora	damicornis	branching	Pacific	None	0	0% bleached	Kenyon & Brainard 2006
Pocillopora ligulata	Pocillopora	ligulata	Pocillopora ligulata	Pocillopora	ligulata	branching	Pacific	None	0	0% bleached	Kenyon & Brainard 2006
Pocillopora meandrina	Pocillopora	meandrina	Pocillopora meandrina	Pocillopora	meandrina	branching	Pacific	None	0	0% bleached	Kenyon & Brainard 2006
Montipora patula	Montipora	patula	Montipora patula	Montipora	patula	encrusting	Pacific	None	0	0% bleached	Kenyon & Brainard 2006
Montipora capitata	Montipora	capitata	Montipora capitata	Montipora	capitata	branching / encrusting	Pacific	None	0	0% bleached	Kenyon & Brainard 2006
Porites evermanni	Porites	evermanni	Porites evermanni	Porites	evermanni	massive / columnar	Pacific	None	0	0% bleached	Kenyon & Brainard 2006
Porites compressa	Porites	compressa	Porites compressa	Porites	compressa	branching	Pacific	None	0	0% bleached	Kenyon & Brainard 2006
Porites lobata	Porites	lobata	Porites lobata	Porites	lobata	massive	Pacific	None	0	0% bleached	Kenyon & Brainard 2006
Montipora patula	Montipora	patula	Montipora patula	Montipora	patula	encrusting	Pacific	None	0	0% bleached	Kenyon & Brainard 2006
Porites evermanni	Porites	evermanni	Porites evermanni	Porites	evermanni	massive / columnar	Pacific	None	0	0% bleached	Kenyon & Brainard 2006
Porites compressa	Porites	compressa	Porites compressa	Porites	compressa	branching	Pacific	None	0	0% bleached	Kenyon & Brainard 2006
Porites lobata	Porites	lobata	Porites lobata	Porites	lobata	massive	Pacific	None	0	0% bleached	Kenyon & Brainard 2006
Pocillopora damicornis	Pocillopora	damicornis	Pocillopora damicornis	Pocillopora	damicornis	branching	Pacific	Low	1	23.6% bleached	Kenyon & Brainard 2006
Pocillopora ligulata	Pocillopora	ligulata	Pocillopora ligulata	Pocillopora	ligulata	branching	Pacific	None	0	0% bleached	Kenyon & Brainard 2006
Pocillopora meandrina	Pocillopora	meandrina	Pocillopora meandrina	Pocillopora	meandrina	branching	Pacific	Low	1	9.5% bleached	Kenyon & Brainard 2006
Montipora patula	Montipora	patula	Montipora patula	Montipora	patula	encrusting	Pacific	None	0	0% bleached	Kenyon & Brainard 2006
Montipora flabellata	Montipora	flabellata	Montipora flabellata	Montipora	flabellata	encrusting	Pacific	None	0	0% bleached	Kenyon & Brainard 2006
Porites lobata	Porites	lobata	Porites lobata	Porites	lobata	massive	Pacific	None	0	0% bleached	Kenyon & Brainard 2006
Pocillopora damicornis	Pocillopora	damicornis	Pocillopora damicornis	Pocillopora	damicornis	branching	Pacific	None	0	0% bleached	Kenyon & Brainard 2006
Pocillopora meandrina	Pocillopora	meandrina	Pocillopora meandrina	Pocillopora	meandrina	branching	Pacific	None	0	0% bleached	Kenyon & Brainard 2006
Montipora capitata	Montipora	capitata	Montipora capitata	Montipora	capitata	branching / encrusting	Pacific	None	0	0% bleached	Kenyon & Brainard 2006
Pocillopora damicornis	Pocillopora	damicornis	Pocillopora damicornis	Pocillopora	damicornis	branching	Pacific	None	0	0% bleached	Kenyon & Brainard 2006
Pocillopora meandrina	Pocillopora	meandrina	Pocillopora meandrina	Pocillopora	meandrina	branching	Pacific	None	0	0% bleached	Kenyon & Brainard 2006
Montipora patula	Montipora	patula	Montipora patula	Montipora	patula	encrusting	Pacific	Moderate	2	68.8% bleached	Kenyon & Brainard 2006
Montipora capitata	Montipora	capitata	Montipora capitata	Montipora	capitata	branching / encrusting	Pacific	Low	1	6.2% bleached	Kenyon & Brainard 2006
Porites evermanni	Porites	evermanni	Porites evermanni	Porites	evermanni	massive / columnar	Pacific	Low	1	35.2% bleached	Kenyon & Brainard 2006
Porites compressa	Porites	compressa	Porites compressa	Porites	compressa	branching	Pacific	Low	1	6.5% bleached	Kenyon & Brainard 2006
Pocillopora damicornis	Pocillopora	damicornis	Pocillopora damicornis	Pocillopora	damicornis	branching	Pacific	Low	1	27.5% bleached	Kenyon & Brainard 2006
Pocillopora ligulata	Pocillopora	ligulata	Pocillopora ligulata	Pocillopora	ligulata	branching	Pacific	None	0	0% bleached	Kenyon & Brainard 2006
Pocillopora meandrina	Pocillopora	meandrina	Pocillopora meandrina	Pocillopora	meandrina	branching	Pacific	Low	1	8% bleached	Kenyon & Brainard 2006
Montipora patula	Montipora	patula	Montipora patula	Montipora	patula	encrusting	Pacific	Low	1	35.5% bleached	Kenyon & Brainard 2006
Montipora capitata	Montipora	capitata	Montipora capitata	Montipora	capitata	branching / encrusting	Pacific	Low	1	13.2% bleached	Kenyon & Brainard 2006
Porites evermanni	Porites	evermanni	Porites evermanni	Porites	evermanni	massive / columnar	Pacific	None	0	0% bleached	Kenyon & Brainard 2006
Porites compressa	Porites	compressa	Porites compressa	Porites	compressa	branching	Pacific	None	0	0% bleached	Kenyon & Brainard 2006
Pocillopora damicornis	Pocillopora	damicornis	Pocillopora damicornis	Pocillopora	damicornis	branching	Pacific	None	0	0% bleached	Kenyon & Brainard 2006
Pocillopora ligulata	Pocillopora	ligulata	Pocillopora ligulata	Pocillopora	ligulata	branching	Pacific	None	0	0% bleached	Kenyon & Brainard 2006
Pocillopora meandrina	Pocillopora	meandrina	Pocillopora meandrina	Pocillopora	meandrina	branching	Pacific	None	0	0% bleached	Kenyon & Brainard 2006
Montipora patula	Montipora	patula	Montipora patula	Montipora	patula	encrusting	Pacific	Moderate	2	56.3% bleached	Kenyon & Brainard 2006
Montipora capitata	Montipora	capitata	Montipora capitata	Montipora	capitata	branching / encrusting	Pacific	Low	1	2.4% bleached	Kenyon & Brainard 2006
Porites evermanni	Porites	evermanni	Porites evermanni	Porites	evermanni	massive / columnar	Pacific	Moderate	2	52.6% bleached	Kenyon & Brainard 2006
Porites compressa	Porites	compressa	Porites compressa	Porites	compressa	branching	Pacific	Low	1	9.1% bleached	Kenyon & Brainard 2006
Porites lobata	Porites	lobata	Porites lobata	Porites	lobata	massive	Pacific	Low	1	23.1% bleached	Kenyon & Brainard 2006
Pocillopora damicornis	Pocillopora	damicornis	Pocillopora damicornis	Pocillopora	damicornis	branching	Pacific	Low	1	27.3% bleached	Kenyon & Brainard 2006
Pocillopora ligulata	Pocillopora	ligulata	Pocillopora ligulata	Pocillopora	ligulata	branching	Pacific	None	0	0% bleached	Kenyon & Brainard 2006
Pocillopora meandrina	Pocillopora	meandrina	Pocillopora meandrina	Pocillopora	meandrina	branching	Pacific	Low	1	20% bleached	Kenyon & Brainard 2006
Montipora patula	Montipora	patula	Montipora patula	Montipora	patula	encrusting	Pacific	None	0	0% bleached	Kenyon & Brainard 2006
Montipora capitata	Montipora	capitata	Montipora capitata	Montipora	capitata	branching / encrusting	Pacific	None	0	0% bleached	Kenyon & Brainard 2006
Porites evermanni	Porites	evermanni	Porites evermanni	Porites	evermanni	massive / columnar	Pacific	None	0	0% bleached	Kenyon & Brainard 2006
Porites compressa	Porites	compressa	Porites compressa	Porites	compressa	branching	Pacific	None	0	0% bleached	Kenyon & Brainard 2006
Porites lobata	Porites	lobata	Porites lobata	Porites	lobata	massive	Pacific	None	0	0% bleached	Kenyon & Brainard 2006
Pocillopora damicornis	Pocillopora	damicornis	Pocillopora damicornis	Pocillopora	damicornis	branching	Pacific	None	0	0% bleached	Kenyon & Brainard 2006
Pocillopora meandrina	Pocillopora	meandrina	Pocillopora meandrina	Pocillopora	meandrina	branching	Pacific	Low	1	4.1% bleached	Kenyon & Brainard 2006
Montipora patula	Montipora	patula	Montipora patula	Montipora	patula	encrusting	Pacific	Severe	4	100% bleached	Kenyon & Brainard 2006
Montipora capitata	Montipora	capitata	Montipora capitata	Montipora	capitata	branching / encrusting	Pacific	High	3	75.5% bleached	Kenyon & Brainard 2006
Montipora flabellata	Montipora	flabellata	Montipora flabellata	Montipora	flabellata	encrusting	Pacific	Low	1	1.2% bleached	Kenyon & Brainard 2006
Montipora turgescens	Montipora	turgescens	Montipora turgescens	Montipora	turgescens	encrusting	Pacific	Severe	4	83.9% bleached	Kenyon & Brainard 2006
Porites evermanni	Porites	evermanni	Porites evermanni	Porites	evermanni	massive / columnar	Pacific	None	0	0% bleached	Kenyon & Brainard 2006
Porites compressa	Porites	compressa	Porites compressa	Porites	compressa	branching	Pacific	None	0	0% bleached	Kenyon & Brainard 2006
Porites lobata	Porites	lobata	Porites lobata	Porites	lobata	massive	Pacific	Low	1	1.1% bleached	Kenyon & Brainard 2006
Pocillopora damicornis	Pocillopora	damicornis	Pocillopora damicornis	Pocillopora	damicornis	branching	Pacific	Moderate	2	43.9% bleached	Kenyon & Brainard 2006
Pocillopora meandrina	Pocillopora	meandrina	Pocillopora meandrina	Pocillopora	meandrina	branching	Pacific	Moderate	2	60.2% bleached	Kenyon & Brainard 2006
Montipora capitata	Montipora	capitata	Montipora capitata	Montipora	capitata	branching / encrusting	Pacific	Severe	4	100% bleached	Kenyon & Brainard 2006
Porites compressa	Porites	compressa	Porites compressa	Porites	compressa	branching	Pacific	Low	1	9.4% bleached	Kenyon & Brainard 2006
Pocillopora damicornis	Pocillopora	damicornis	Pocillopora damicornis	Pocillopora	damicornis	branching	Pacific	Moderate	2	66.7% bleached	Kenyon & Brainard 2006
Pocillopora meandrina	Pocillopora	meandrina	Pocillopora meandrina	Pocillopora	meandrina	branching	Pacific	High	3	74.8% bleached	Kenyon & Brainard 2006
Montipora capitata	Montipora	capitata	Montipora capitata	Montipora	capitata	branching / encrusting	Pacific	Moderate	2	50% bleached	Kenyon & Brainard 2006
Porites lobata	Porites	lobata	Porites lobata	Porites	lobata	massive	Pacific	None	0	0% bleached	Kenyon & Brainard 2006
Pocillopora meandrina	Pocillopora	meandrina	Pocillopora meandrina	Pocillopora	meandrina	branching	Pacific	None	0	0% bleached	Kenyon & Brainard 2006
Montipora capitata	Montipora	capitata	Montipora capitata	Montipora	capitata	branching / encrusting	Pacific	Severe	4	100% bleached	Kenyon & Brainard 2006
Montipora flabellata	Montipora	flabellata	Montipora flabellata	Montipora	flabellata	encrusting	Pacific	Low	1	7.4% bleached	Kenyon & Brainard 2006
Montipora turgescens	Montipora	turgescens	Montipora turgescens	Montipora	turgescens	encrusting	Pacific	Moderate	2	66.7% bleached	Kenyon & Brainard 2006
Porites evermanni	Porites	evermanni	Porites evermanni	Porites	evermanni	massive / columnar	Pacific	Low	1	33.3% bleached	Kenyon & Brainard 2006
Porites lobata	Porites	lobata	Porites lobata	Porites	lobata	massive	Pacific	Low	1	1.9% bleached	Kenyon & Brainard 2006
Pocillopora damicornis	Pocillopora	damicornis	Pocillopora damicornis	Pocillopora	damicornis	branching	Pacific	Low	1	18.8% bleached	Kenyon & Brainard 2006
Pocillopora meandrina	Pocillopora	meandrina	Pocillopora meandrina	Pocillopora	meandrina	branching	Pacific	Low	1	11.1% bleached	Kenyon & Brainard 2006
Porites lobata	Porites	lobata	Porites lobata	Porites	lobata	massive	Pacific	None	0	0% bleached	Kenyon & Brainard 2006
Pocillopora damicornis	Pocillopora	damicornis	Pocillopora damicornis	Pocillopora	damicornis	branching	Pacific	Low	1	9.1% bleached	Kenyon & Brainard 2006
Pocillopora meandrina	Pocillopora	meandrina	Pocillopora meandrina	Pocillopora	meandrina	branching	Pacific	Low	1	31.3% bleached	Kenyon & Brainard 2006
Porites lobata	Porites	lobata	Porites lobata	Porites	lobata	massive	Pacific	None	0	0% bleached	Kenyon & Brainard 2006
Pocillopora damicornis	Pocillopora	damicornis	Pocillopora damicornis	Pocillopora	damicornis	branching	Pacific	None	0	0% bleached	Kenyon & Brainard 2006
Pocillopora meandrina	Pocillopora	meandrina	Pocillopora meandrina	Pocillopora	meandrina	branching	Pacific	Low	1	4.1% bleached	Kenyon & Brainard 2006
Montipora capitata	Montipora	capitata	Montipora capitata	Montipora	capitata	branching / encrusting	Pacific	Moderate	2	61.5% bleached	Kenyon & Brainard 2006
Montipora flabellata	Montipora	flabellata	Montipora flabellata	Montipora	flabellata	encrusting	Pacific	Low	1	1.4% bleached	Kenyon & Brainard 2006
Montipora turgescens	Montipora	turgescens	Montipora turgescens	Montipora	turgescens	encrusting	Pacific	None	0	0% bleached	Kenyon & Brainard 2006
Porites lobata	Porites	lobata	Porites lobata	Porites	lobata	massive	Pacific	None	0	0% bleached	Kenyon & Brainard 2006
Pocillopora damicornis	Pocillopora	damicornis	Pocillopora damicornis	Pocillopora	damicornis	branching	Pacific	Low	1	3.7% bleached	Kenyon & Brainard 2006
Pocillopora ligulata	Pocillopora	ligulata	Pocillopora ligulata	Pocillopora	ligulata	branching	Pacific	None	0	0% bleached	Kenyon & Brainard 2006
Pocillopora meandrina	Pocillopora	meandrina	Pocillopora meandrina	Pocillopora	meandrina	branching	Pacific	Low	1	6.2% bleached	Kenyon & Brainard 2006
Porites compressa	Porites	compressa	Porites compressa	Porites	compressa	branching	Pacific	None	0	0% bleached	Kenyon & Brainard 2006
Pocillopora damicornis	Pocillopora	damicornis	Pocillopora damicornis	Pocillopora	damicornis	branching	Pacific	Low	1	6.7% bleached	Kenyon & Brainard 2006
Pocillopora ligulata	Pocillopora	ligulata	Pocillopora ligulata	Pocillopora	ligulata	branching	Pacific	Moderate	2	40% bleached	Kenyon & Brainard 2006
Pocillopora meandrina	Pocillopora	meandrina	Pocillopora meandrina	Pocillopora	meandrina	branching	Pacific	Moderate	2	42.9% bleached	Kenyon & Brainard 2006
Acropora	Acropora	sp.	Acropora	Acropora	sp.	branching	Pacific	Severe	4	93% bleached	Nolan et al. 2021
Anacropora	Anacropora	sp.	Anacropora	Anacropora	sp.	branching	Pacific	Severe	4	100% bleached	Nolan et al. 2021
Astreopora	Astreopora	sp.	Astreopora	Astreopora	sp.	massive / encrusting	Pacific	Low	1	20% bleached	Nolan et al. 2021
Dipsastraea	Dipsastraea	sp.	Dipsastraea	Dipsastraea	sp.	massive	Pacific	None	0	0% bleached	Nolan et al. 2021
Echinopora	Echinopora	sp.	Echinopora	Echinopora	sp.	plating	Pacific	None	0	0% bleached	Nolan et al. 2021
Favites	Favites	sp.	Favites	Favites	sp.	massive	Pacific	Low	1	10% bleached	Nolan et al. 2021
Fungia	Fungia	sp.	Fungia	Fungia	sp.	free-living	Pacific	None	0	0% bleached	Nolan et al. 2021
Galaxea	Galaxea	sp.	Galaxea	Galaxea	sp.	massive	Pacific	Low	1	33% bleached	Nolan et al. 2021
Goniastrea	Goniastrea	sp.	Goniastrea	Goniastrea	sp.	massive	Pacific	Low	1	5% bleached	Nolan et al. 2021
Goniopora	Goniopora	sp.	Goniopora / Alveopora	Goniopora	sp.	massive	Pacific	Low	1	38% bleached	Nolan et al. 2021
Hydnophora	Hydnophora	sp.	Hydnophora	Hydnophora	sp.	massive	Pacific	Moderate	2	50% bleached	Nolan et al. 2021
Lobophyllia	Lobophyllia	sp.	Lobophyllia	Lobophyllia	sp.	encrusting	Pacific	Low	1	4% bleached	Nolan et al. 2021
Montipora	Montipora	sp.	Montipora	Montipora	sp.	encrusting / plating	Pacific	High	3	83% bleached	Nolan et al. 2021
Pectinia	Pectinia	sp.	Pectinia	Pectinia	sp.	branching / plating	Pacific	Severe	4	100% bleached	Nolan et al. 2021
Platygyra	Platygyra	sp.	Platygyra	Platygyra	sp.	massive	Pacific	None	0	0% bleached	Nolan et al. 2021
Pocillopora	Pocillopora	sp.	Pocillopora	Pocillopora	sp.	branching	Pacific	High	3	71% bleached	Nolan et al. 2021
Porites	Porites	sp.	Porites	Porites	sp.	branching / massive	Pacific	Low	1	11% bleached	Nolan et al. 2021
Seriatopora	Seriatopora	sp.	Seriatopora	Seriatopora	sp.	branching	Pacific	Severe	4	99% bleached	Nolan et al. 2021
Stylophora	Stylophora	sp.	Stylophora	Stylophora	sp.	branching	Pacific	High	3	68% bleached	Nolan et al. 2021
Lobophyllia	Lobophyllia	sp.	Symphyllia	Symphyllia	sp.	encrusting	Pacific	Moderate	2	50% bleached	Nolan et al. 2021
Favia	Favia	sp.	Favia	Favia	sp.	massive	Indian	None	0	0% bleached	Riegl et al. 2012
Cyphastrea	Cyphastrea	sp.	Cyphastrea	Cyphastrea	sp.	massive	Indian	None	0	0% bleached	Riegl et al. 2012
Favites	Favites	sp.	Favites	Favites	sp.	massive	Indian	None	0	0% bleached	Riegl et al. 2012
Platygyra	Platygyra	sp.	Platygyra	Platygyra	sp.	massive	Indian	None	0	0% bleached	Riegl et al. 2012
Porites	Porites	sp.	Porites	Porites	sp.	branching / massive	Indian	Low	1	33% bleached	Riegl et al. 2012
Favites	Favites	sp.	Favites	Favites	sp.	massive	Indian	None	0	0% bleached	Riegl et al. 2012
Acropora	Acropora	sp.	Acropora	Acropora	sp.	branching	Indian	Severe	4	100% bleached	Riegl et al. 2012
Favia	Favia	sp.	Favia	Favia	sp.	massive	Indian	Low	1	25% bleached	Riegl et al. 2012
Porites	Porites	sp.	Porites	Porites	sp.	branching / massive	Indian	Moderate	2	55% bleached	Riegl et al. 2012
Coscinaraea	Coscinaraea	sp.	Coscinaraea	Coscinaraea	sp.	encrusting / plating	Indian	Moderate	2	53% bleached	Riegl et al. 2012
Platygyra	Platygyra	sp.	Platygyra	Platygyra	sp.	massive	Indian	Low	1	26% bleached	Riegl et al. 2012
Cyphastrea	Cyphastrea	sp.	Cyphastrea	Cyphastrea	sp.	massive	Indian	Low	1	10% bleached	Riegl et al. 2012
Porites lutea	Porites	lutea	Porites lutea	Porites	lutea	massive	Indian	Low	1	25% bleached	Riegl et al. 2012
Turbinaria reniformis	Turbinaria	reniformis	Turbinaria reniformis	Turbinaria	reniformis	plating	Indian	Low	1	20% bleached	Riegl et al. 2012
Favia	Favia	spp.	Favia	Favia	spp.	massive	Indian	Low	1	10% bleached	Riegl et al. 2012
Cyphastrea	Cyphastrea	spp.	Cyphastrea	Cyphastrea	spp.	massive	Indian	Low	1	12% bleached	Riegl et al. 2012
Platygyra daedalea	Platygyra	daedalea	Platygyra daedalea	Platygyra	daedalea	massive	Indian	Low	1	35% bleached	Riegl et al. 2012
Coscinaraea	Coscinaraea	spp.	Coscinaraea	Coscinaraea	spp.	encrusting / plating	Indian	Low	1	33% bleached	Riegl et al. 2012
Porites harrisoni	Porites	harrisoni	Porites harrisoni	Porites	harrisoni	massive / columnar	Indian	Moderate	2	50% bleached	Riegl et al. 2012
Acropora downingi	Acropora	downingi	Acropora downingi	Acropora	downingi	table / branching	Indian	Severe	4	90% bleached	Riegl et al. 2012
Favia	Favia	spp.	Favia	Favia	spp.	massive	Indian	Severe	4	88% bleached	Riegl et al. 2012
Porites harrisoni	Porites	harrisoni	Porites harrisoni	Porites	harrisoni	massive / columnar	Indian	Severe	4	100% bleached	Riegl et al. 2012
Psammocora columna	Psammocora	columna	Coscinaraea columna	Coscinaraea	columna	massive / encrusting	Indian	Severe	4	100% bleached	Riegl et al. 2012
Platygyra daedalea	Platygyra	daedalea	Platygyra daedalea	Platygyra	daedalea	massive	Indian	High	3	71% bleached	Riegl et al. 2012
Cyphastrea microphthalma	Cyphastrea	microphthalma	Cyphastrea microphthalma	Cyphastrea	microphthalma	massive	Indian	Moderate	2	40% bleached	Riegl et al. 2012
Anomastraea irregularis	Anomastraea	irregularis	Anomastraea irregularis	Anomastraea	irregularis	massive	Indian	Severe	4	100% bleached	Riegl et al. 2012
Porites lutea	Porites	lutea	Porites lutea	Porites	lutea	massive	Indian	Low	1	10% bleached	Riegl et al. 2012
Turbinaria reniformis	Turbinaria	reniformis	Turbinaria reniformis	Turbinaria	reniformis	plating	Indian	Low	1	5% bleached	Riegl et al. 2012
Favia	Favia	spp.	Favia	Favia	spp.	massive	Indian	Low	1	3% bleached	Riegl et al. 2012
Cyphastrea	Cyphastrea	spp.	Cyphastrea	Cyphastrea	spp.	massive	Indian	Low	1	2% bleached	Riegl et al. 2012
Platygyra daedalea	Platygyra	daedalea	Platygyra daedalea	Platygyra	daedalea	massive	Indian	Low	1	10% bleached	Riegl et al. 2012
Coscinaraea	Coscinaraea	spp.	Coscinaraea	Coscinaraea	spp.	encrusting / plating	Indian	Low	1	14% bleached	Riegl et al. 2012
Porites harrisoni	Porites	harrisoni	Porites harrisoni	Porites	harrisoni	massive / columnar	Indian	Low	1	27% bleached	Riegl et al. 2012
Acropora downingi	Acropora	downingi	Acropora downingi	Acropora	downingi	table / branching	Indian	Moderate	2	52% bleached	Riegl et al. 2012
Pocillopora	Pocillopora	sp.	Pocillopora	Pocillopora	sp.	branching	Indian	Low	1	1-10% bleaching	Hardman et al. 2007
Stylophora	Stylophora	sp.	Stylophora	Stylophora	sp.	branching	Indian	Low	1	11-30% bleaching	Hardman et al. 2007
Montipora	Montipora	sp.	Montipora	Montipora	sp.	encrusting / plating	Indian	Moderate	2	31-50% bleaching	Hardman et al. 2007
Acropora	Acropora	sp.	Acropora (branching)	Acropora	sp.	branching	Indian	High	3	51-75% bleaching	Hardman et al. 2007
Acropora	Acropora	sp.	Acropora (table)	Acropora	sp.	table / branching	Indian	Low	1	11-30% bleaching	Hardman et al. 2007
Acropora	Acropora	sp.	Acropora (digitate)	Acropora	sp.	digitate	Indian	Low	1	11-30% bleaching	Hardman et al. 2007
Acropora	Acropora	sp.	Acropora (encrusting)	Acropora	sp.	encrusting	Indian	Moderate	2	51-75% bleaching	Hardman et al. 2007
Porites rus	Porites	rus	Porites rus	Porites	rus	branching / encrusting	Indian	Moderate	2	51-75% bleaching	Hardman et al. 2007
Galaxea	Galaxea	sp.	Galaxea	Galaxea	sp.	massive	Indian	Low	1	31-50% bleaching	Hardman et al. 2007
Lobophyllia	Lobophyllia	sp.	Symphyllia	Symphyllia	sp.	encrusting	Indian	Severe	4	76-100% bleaching	Hardman et al. 2007
Hydnophora	Hydnophora	sp.	Hydnophora	Hydnophora	sp.	massive	Indian	Low	1	11-30% bleaching	Hardman et al. 2007
Favia	Favia	sp.	Favia	Favia	sp.	massive	Indian	Low	1	1-10% bleaching	Hardman et al. 2007
Platygyra	Platygyra	sp.	Platygyra	Platygyra	sp.	massive	Indian	Low	1	1-10% bleaching	Hardman et al. 2007
Acropora	Acropora	sp.	Acropora (staghorn)	Acropora	sp.	branching	Pacific	None	0	0% bleached	Kennedy et al. 2017
Acropora	Acropora	sp.	Acropora (digitate)	Acropora	sp.	digitate	Pacific	None	0	0% bleached	Kennedy et al. 2017
Acropora	Acropora	sp.	Acropora (table)	Acropora	sp.	table / branching	Pacific	None	0	0% bleached	Kennedy et al. 2017
Pocillopora	Pocillopora	sp.	Pocillopora	Pocillopora	sp.	branching	Pacific	Moderate	2	43% bleached	Kennedy et al. 2017
Montipora	Montipora	sp.	Montipora	Montipora	sp.	encrusting / plating	Pacific	None	0	0% bleached	Kennedy et al. 2017
Favia	Favia	sp.	Faviidae	Favia	sp.	massive	Pacific	None	0	0% bleached	Kennedy et al. 2017
Porites	Porites	sp.	Poritidae	Porites	sp.	branching / massive	Pacific	None	0	0% bleached	Kennedy et al. 2017
Fungia	Fungia	sp.	Fungia	Fungia	sp.	free-living	Pacific	None	0	0% bleached	Kennedy et al. 2017
Acropora	Acropora	sp.	Acropora (staghorn)	Acropora	sp.	branching	Pacific	Low	1	0.7% bleached	Kennedy et al. 2017
Acropora	Acropora	sp.	Acropora (digitate)	Acropora	sp.	digitate	Pacific	Low	1	4% bleached	Kennedy et al. 2017
Acropora	Acropora	sp.	Acropora (table)	Acropora	sp.	table / branching	Pacific	None	0	0% bleached	Kennedy et al. 2017
Pocillopora	Pocillopora	sp.	Pocillopora	Pocillopora	sp.	branching	Pacific	Moderate	2	25% bleached	Kennedy et al. 2017
Montipora	Montipora	sp.	Montipora	Montipora	sp.	encrusting / plating	Pacific	None	0	0% bleached	Kennedy et al. 2017
Favia	Favia	sp.	Faviidae	Favia	sp.	massive	Pacific	None	0	0% bleached	Kennedy et al. 2017
Porites	Porites	sp.	Poritidae	Porites	sp.	branching / massive	Pacific	None	0	0% bleached	Kennedy et al. 2017
Fungia	Fungia	sp.	Fungia	Fungia	sp.	free-living	Pacific	None	0	0% bleached	Kennedy et al. 2017
Acropora	Acropora	sp.	Acropora (staghorn)	Acropora	sp.	branching	Pacific	Low	1	3.8% bleached	Kennedy et al. 2017
Acropora	Acropora	sp.	Acropora (digitate)	Acropora	sp.	digitate	Pacific	None	0	0% bleached	Kennedy et al. 2017
Acropora	Acropora	sp.	Acropora (table)	Acropora	sp.	table / branching	Pacific	None	0	0% bleached	Kennedy et al. 2017
Pocillopora	Pocillopora	sp.	Pocillopora	Pocillopora	sp.	branching	Pacific	Moderate	2	25% bleached	Kennedy et al. 2017
Montipora	Montipora	sp.	Montipora	Montipora	sp.	encrusting / plating	Pacific	None	0	0% bleached	Kennedy et al. 2017
Favia	Favia	sp.	Faviidae	Favia	sp.	massive	Pacific	None	0	0% bleached	Kennedy et al. 2017
Porites	Porites	sp.	Poritidae	Porites	sp.	branching / massive	Pacific	None	0	0% bleached	Kennedy et al. 2017
Fungia	Fungia	sp.	Fungia	Fungia	sp.	free-living	Pacific	None	0	0% bleached	Kennedy et al. 2017
Acropora	Acropora	sp.	Acropora (staghorn)	Acropora	sp.	branching	Pacific	Low	1	3.3% bleached	Kennedy et al. 2017
Acropora	Acropora	sp.	Acropora (digitate)	Acropora	sp.	digitate	Pacific	None	0	0% bleached	Kennedy et al. 2017
Acropora	Acropora	sp.	Acropora (table)	Acropora	sp.	table / branching	Pacific	Low	1	6.9% bleached	Kennedy et al. 2017
Pocillopora	Pocillopora	sp.	Pocillopora	Pocillopora	sp.	branching	Pacific	Moderate	2	30.8% bleached	Kennedy et al. 2017
Montipora	Montipora	sp.	Montipora	Montipora	sp.	encrusting / plating	Pacific	None	0	0% bleached	Kennedy et al. 2017
Favia	Favia	sp.	Faviidae	Favia	sp.	massive	Pacific	None	0	0% bleached	Kennedy et al. 2017
Porites	Porites	sp.	Poritidae	Porites	sp.	branching / massive	Pacific	None	0	0% bleached	Kennedy et al. 2017
Fungia	Fungia	sp.	Fungia	Fungia	sp.	free-living	Pacific	Low	1	10% bleached	Kennedy et al. 2017
Acropora	Acropora	sp.	Acropora (staghorn)	Acropora	sp.	branching	Pacific	None	0	0% bleached	Kennedy et al. 2017
Acropora	Acropora	sp.	Acropora (digitate)	Acropora	sp.	digitate	Pacific	None	0	0% bleached	Kennedy et al. 2017
Acropora	Acropora	sp.	Acropora (table)	Acropora	sp.	table / branching	Pacific	None	0	0% bleached	Kennedy et al. 2017
Pocillopora	Pocillopora	sp.	Pocillopora	Pocillopora	sp.	branching	Pacific	Moderate	2	25% bleached	Kennedy et al. 2017
Montipora	Montipora	sp.	Montipora	Montipora	sp.	encrusting / plating	Pacific	None	0	0% bleached	Kennedy et al. 2017
Favia	Favia	sp.	Faviidae	Favia	sp.	massive	Pacific	None	0	0% bleached	Kennedy et al. 2017
Porites	Porites	sp.	Poritidae	Porites	sp.	branching / massive	Pacific	None	0	0% bleached	Kennedy et al. 2017
Fungia	Fungia	sp.	Fungia	Fungia	sp.	free-living	Pacific	None	0	0% bleached	Kennedy et al. 2017
Acropora	Acropora	sp.	Acropora (staghorn)	Acropora	sp.	branching	Pacific	None	0	0% bleached	Kennedy et al. 2017
Acropora	Acropora	sp.	Acropora (digitate)	Acropora	sp.	digitate	Pacific	None	0	0% bleached	Kennedy et al. 2017
Acropora	Acropora	sp.	Acropora (table)	Acropora	sp.	table / branching	Pacific	None	0	0% bleached	Kennedy et al. 2017
Pocillopora	Pocillopora	sp.	Pocillopora	Pocillopora	sp.	branching	Pacific	None	0	0% bleached	Kennedy et al. 2017
Montipora	Montipora	sp.	Montipora	Montipora	sp.	encrusting / plating	Pacific	None	0	0% bleached	Kennedy et al. 2017
Favia	Favia	sp.	Faviidae	Favia	sp.	massive	Pacific	Moderate	2	16.7% bleached	Kennedy et al. 2017
Porites	Porites	sp.	Poritidae	Porites	sp.	branching / massive	Pacific	None	0	0% bleached	Kennedy et al. 2017
Fungia	Fungia	sp.	Fungia	Fungia	sp.	free-living	Pacific	None	0	0% bleached	Kennedy et al. 2017
Acropora	Acropora	sp.	Acropora (staghorn)	Acropora	sp.	branching	Pacific	Low	1	1.3% bleached	Kennedy et al. 2017
Acropora	Acropora	sp.	Acropora (digitate)	Acropora	sp.	digitate	Pacific	Moderate	2	20.7% bleached	Kennedy et al. 2017
Acropora	Acropora	sp.	Acropora (table)	Acropora	sp.	table / branching	Pacific	None	0	0% bleached	Kennedy et al. 2017
Pocillopora	Pocillopora	sp.	Pocillopora	Pocillopora	sp.	branching	Pacific	None	0	0% bleached	Kennedy et al. 2017
Montipora	Montipora	sp.	Montipora	Montipora	sp.	encrusting / plating	Pacific	None	0	0% bleached	Kennedy et al. 2017
Favia	Favia	sp.	Faviidae	Favia	sp.	massive	Pacific	None	0	0% bleached	Kennedy et al. 2017
Porites	Porites	sp.	Poritidae	Porites	sp.	branching / massive	Pacific	None	0	0% bleached	Kennedy et al. 2017
Fungia	Fungia	sp.	Fungia	Fungia	sp.	free-living	Pacific	None	0	0% bleached	Kennedy et al. 2017
Acropora	Acropora	sp.	Acropora (staghorn)	Acropora	sp.	branching	Pacific	Low	1	1.7% bleached	Kennedy et al. 2017
Acropora	Acropora	sp.	Acropora (digitate)	Acropora	sp.	digitate	Pacific	None	0	0% bleached	Kennedy et al. 2017
Acropora	Acropora	sp.	Acropora (table)	Acropora	sp.	table / branching	Pacific	None	0	0% bleached	Kennedy et al. 2017
Pocillopora	Pocillopora	sp.	Pocillopora	Pocillopora	sp.	branching	Pacific	None	0	0% bleached	Kennedy et al. 2017
Montipora	Montipora	sp.	Montipora	Montipora	sp.	encrusting / plating	Pacific	None	0	0% bleached	Kennedy et al. 2017
Favia	Favia	sp.	Faviidae	Favia	sp.	massive	Pacific	Low	1	10% bleached	Kennedy et al. 2017
Porites	Porites	sp.	Poritidae	Porites	sp.	branching / massive	Pacific	None	0	0% bleached	Kennedy et al. 2017
Fungia	Fungia	sp.	Fungia	Fungia	sp.	free-living	Pacific	None	0	0% bleached	Kennedy et al. 2017
Acropora	Acropora	sp.	Acropora (staghorn)	Acropora	sp.	branching	Pacific	None	0	0% bleached	Kennedy et al. 2017
Acropora	Acropora	sp.	Acropora (digitate)	Acropora	sp.	digitate	Pacific	Moderate	2	18.2% bleached	Kennedy et al. 2017
Acropora	Acropora	sp.	Acropora (table)	Acropora	sp.	table / branching	Pacific	Low	1	5.5% bleached	Kennedy et al. 2017
Pocillopora	Pocillopora	sp.	Pocillopora	Pocillopora	sp.	branching	Pacific	None	0	0% bleached	Kennedy et al. 2017
Montipora	Montipora	sp.	Montipora	Montipora	sp.	encrusting / plating	Pacific	Low	1	7.5% bleached	Kennedy et al. 2017
Favia	Favia	sp.	Faviidae	Favia	sp.	massive	Pacific	High	3	49.4% bleached	Kennedy et al. 2017
Porites	Porites	sp.	Poritidae	Porites	sp.	branching / massive	Pacific	None	0	0% bleached	Kennedy et al. 2017
Fungia	Fungia	sp.	Fungia	Fungia	sp.	free-living	Pacific	None	0	0% bleached	Kennedy et al. 2017
Acropora	Acropora	sp.	Acropora (staghorn)	Acropora	sp.	branching	Pacific	Low	1	8.6% bleached	Kennedy et al. 2017
Acropora	Acropora	sp.	Acropora (digitate)	Acropora	sp.	digitate	Pacific	None	0	0% bleached	Kennedy et al. 2017
Acropora	Acropora	sp.	Acropora (table)	Acropora	sp.	table / branching	Pacific	Low	1	11.8% bleached	Kennedy et al. 2017
Pocillopora	Pocillopora	sp.	Pocillopora	Pocillopora	sp.	branching	Pacific	None	0	0% bleached	Kennedy et al. 2017
Montipora	Montipora	sp.	Montipora	Montipora	sp.	encrusting / plating	Pacific	None	0	0% bleached	Kennedy et al. 2017
Favia	Favia	sp.	Faviidae	Favia	sp.	massive	Pacific	None	0	0% bleached	Kennedy et al. 2017
Porites	Porites	sp.	Poritidae	Porites	sp.	branching / massive	Pacific	None	0	0% bleached	Kennedy et al. 2017
Fungia	Fungia	sp.	Fungia	Fungia	sp.	free-living	Pacific	None	0	0% bleached	Kennedy et al. 2017
Acropora	Acropora	sp.	Acropora (staghorn)	Acropora	sp.	branching	Pacific	Low	1	13.8% bleached	Kennedy et al. 2017
Acropora	Acropora	sp.	Acropora (digitate)	Acropora	sp.	digitate	Pacific	None	0	0% bleached	Kennedy et al. 2017
Acropora	Acropora	sp.	Acropora (table)	Acropora	sp.	table / branching	Pacific	None	0	0% bleached	Kennedy et al. 2017
Pocillopora	Pocillopora	sp.	Pocillopora	Pocillopora	sp.	branching	Pacific	None	0	0% bleached	Kennedy et al. 2017
Montipora	Montipora	sp.	Montipora	Montipora	sp.	encrusting / plating	Pacific	None	0	0% bleached	Kennedy et al. 2017
Favia	Favia	sp.	Faviidae	Favia	sp.	massive	Pacific	None	0	0% bleached	Kennedy et al. 2017
Porites	Porites	sp.	Poritidae	Porites	sp.	branching / massive	Pacific	None	0	0% bleached	Kennedy et al. 2017
Fungia	Fungia	sp.	Fungia	Fungia	sp.	free-living	Pacific	None	0	0% bleached	Kennedy et al. 2017
Acropora	Acropora	sp.	Acropora (staghorn)	Acropora	sp.	branching	Pacific	Moderate	2	21.9% bleached	Kennedy et al. 2017
[truncated: 138 more rows]
